# Supplementary material
Source: MDPI journal article supplement (https://www.mdpi.com/2073-4441/15/24/4267)

**Table S-D01** *Penilia avirrostris* trends in the western Mediterranean Sea (2007-2017)

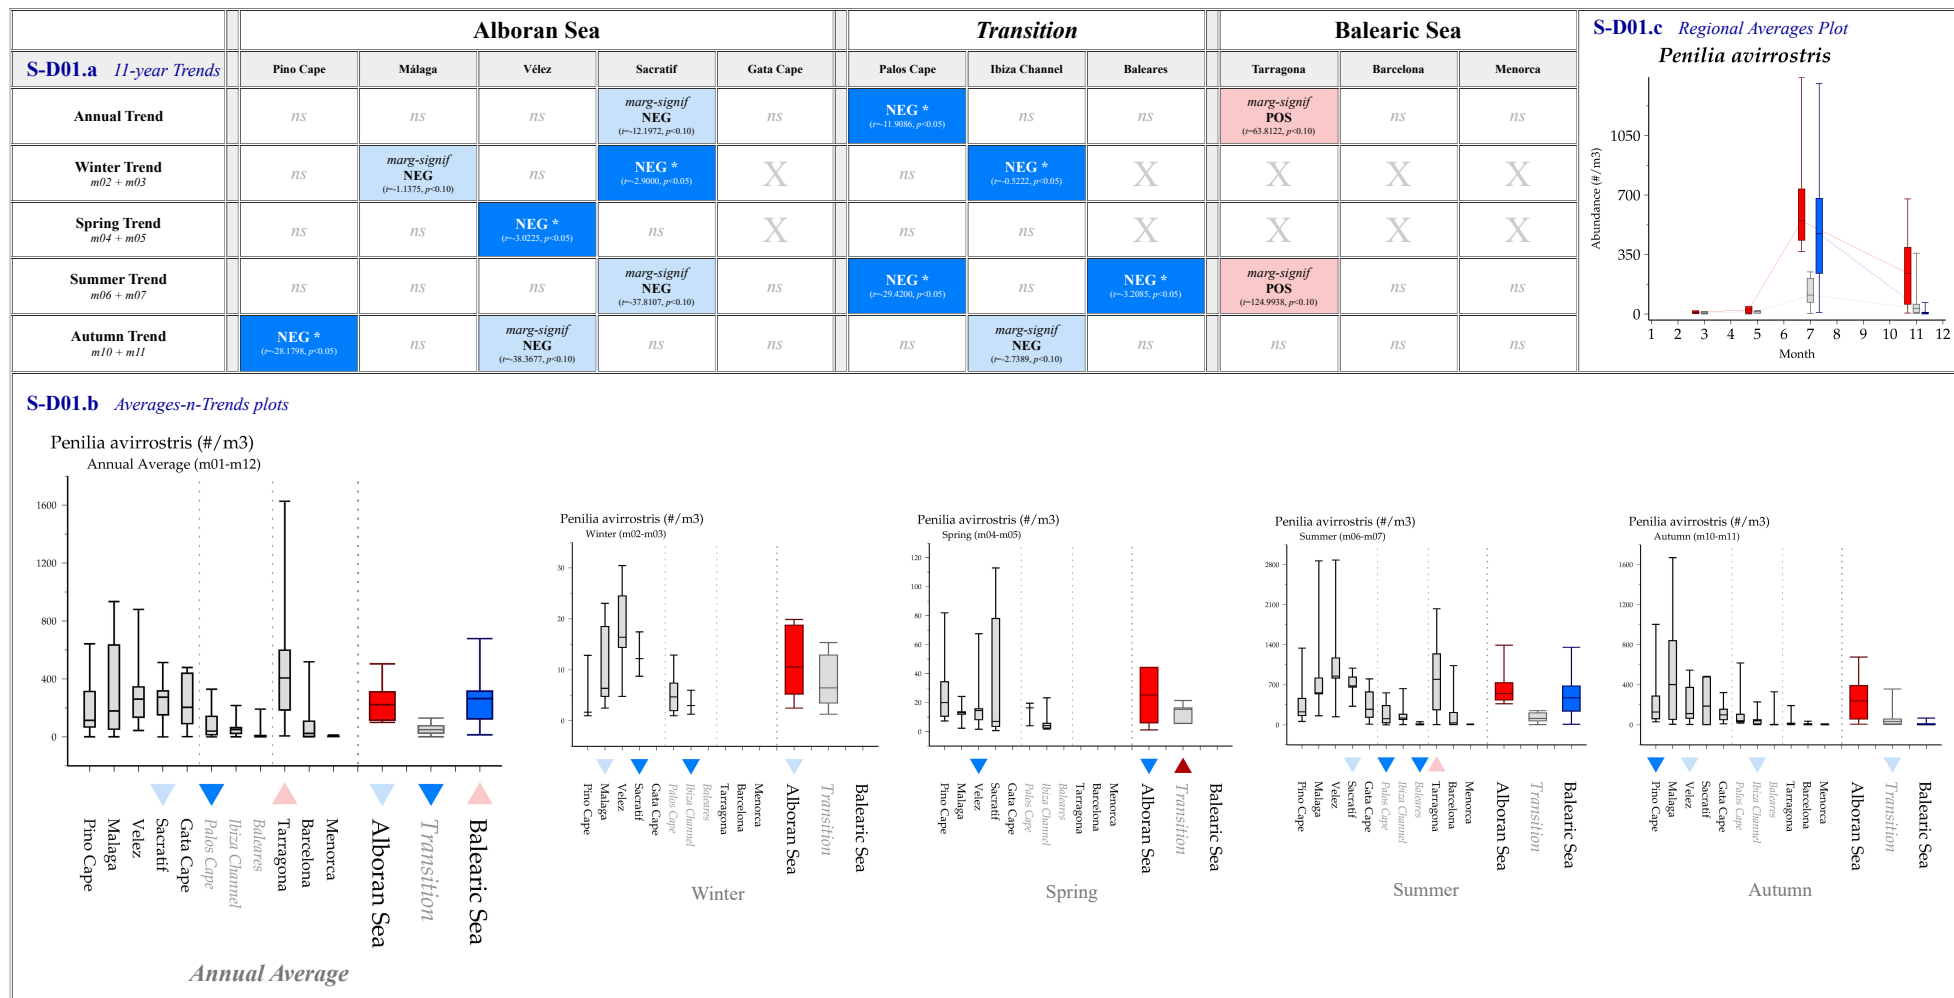

**Table S-D02** *Evadne spinifera* trends in the western Mediterranean Sea (2007-2017)

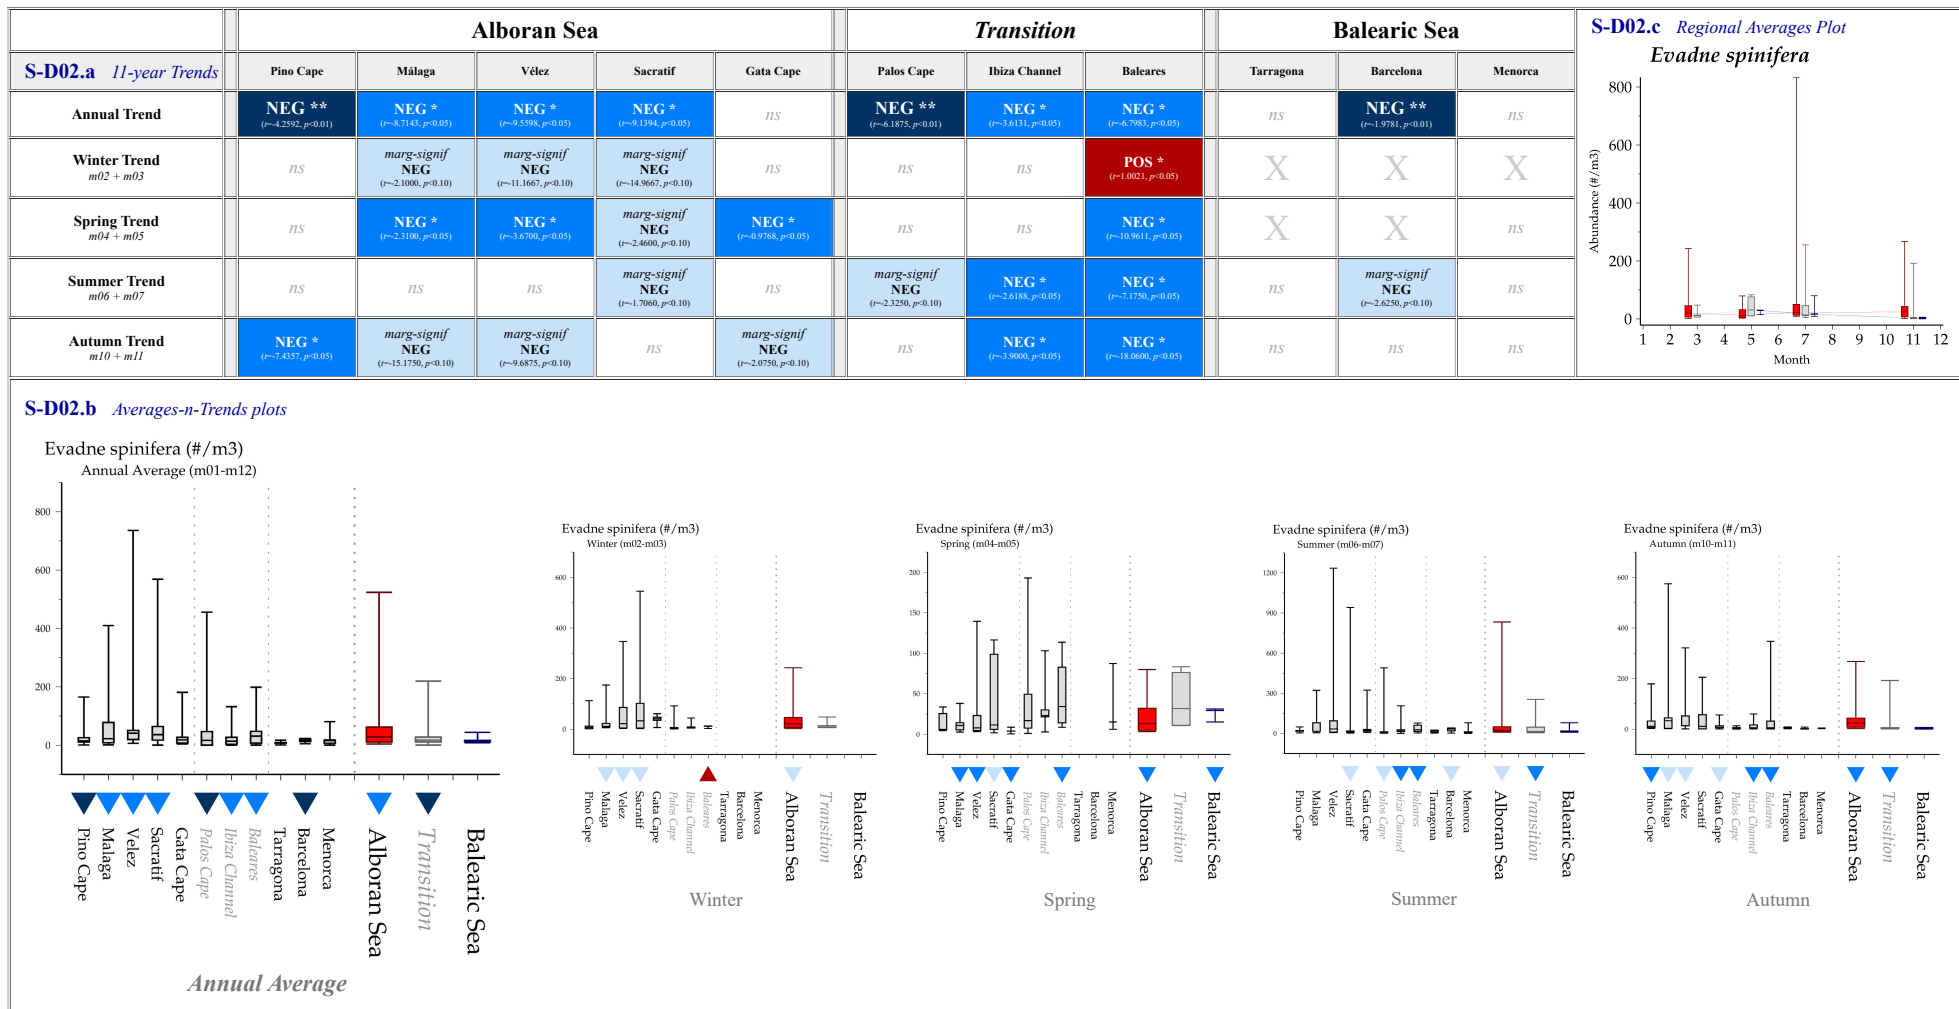

**Table S-D03** *Clausocalanus arcuicornis* trends in the western Mediterranean Sea (2007-2017)

|                                      | Alboran Sea                                         |                                                                          |                                                      |                                                     |            | Transition |                                                                          |                                                                        | Balearic Sea                                         |                                                     |            | <b>S-D03.c</b> <i>Regional Averages Plot</i><br><i>Clausocalanus arcuicornis</i> |
|--------------------------------------|-----------------------------------------------------|--------------------------------------------------------------------------|------------------------------------------------------|-----------------------------------------------------|------------|------------|--------------------------------------------------------------------------|------------------------------------------------------------------------|------------------------------------------------------|-----------------------------------------------------|------------|----------------------------------------------------------------------------------|
| <b>S-D03.a</b> <i>11-year Trends</i> | Pino Cape                                           | Málaga                                                                   | Yélez                                                | Sacratif                                            | Gata Cape  | Palos Cape | Ibiza Channel                                                            | Baleares                                                               | Tarragona                                            | Barcelona                                           | Menorca    |                                                                                  |
| Annual Trend                         | <i>n/s</i>                                          | <i>n/s</i>                                                               | <i>n/s</i>                                           | <i>n/s</i>                                          | <i>n/s</i> | <i>n/s</i> | <i>n/s</i>                                                               | <i>n/s</i>                                                             | <i>n/s</i>                                           | <i>n/s</i>                                          | <i>n/s</i> |                                                                                  |
| Winter Trend<br><i>m02 + m03</i>     | <i>n/s</i>                                          | <i>n/s</i>                                                               | <i>n/s</i>                                           | POS *<br><i>(<math>r=19.6000, p&lt;0.05</math>)</i> | <i>n/s</i> | <i>n/s</i> | <i>marg-signif</i><br>NEG<br><i>(<math>r=-26.6757, p&lt;0.10</math>)</i> | <i>n/s</i>                                                             | POS **<br><i>(<math>r=44.3500, p&lt;0.01</math>)</i> | <i>n/s</i>                                          | <i>n/s</i> |                                                                                  |
| Spring Trend<br><i>m04 + m05</i>     | POS *<br><i>(<math>r=9.7700, p&lt;0.05</math>)</i>  | <i>n/s</i>                                                               | <i>n/s</i>                                           | <i>n/s</i>                                          | <i>n/s</i> | <i>n/s</i> | <i>n/s</i>                                                               | <i>n/s</i>                                                             | <i>n/s</i>                                           | <i>n/s</i>                                          | <i>n/s</i> |                                                                                  |
| Summer Trend<br><i>m06 + m07</i>     | <i>n/s</i>                                          | <i>n/s</i>                                                               | <i>n/s</i>                                           | <i>n/s</i>                                          | <i>n/s</i> | <i>n/s</i> | <i>n/s</i>                                                               | <i>marg-signif</i><br>POS<br><i>(<math>r=5.1292, p&lt;0.10</math>)</i> | <i>n/s</i>                                           | NEG *<br><i>(<math>r=-6.3000, p&lt;0.05</math>)</i> | <i>n/s</i> |                                                                                  |
| Autumn Trend<br><i>m10 + m11</i>     | NEG *<br><i>(<math>r=-6.4125, p&lt;0.05</math>)</i> | <i>marg-signif</i><br>NEG<br><i>(<math>r=-14.6214, p&lt;0.10</math>)</i> | NEG *<br><i>(<math>r=-10.0250, p&lt;0.05</math>)</i> | NEG *<br><i>(<math>r=-9.9200, p&lt;0.05</math>)</i> | <i>n/s</i> | <i>n/s</i> | <i>n/s</i>                                                               | <i>n/s</i>                                                             | NEG **<br><i>(<math>r=-2.9719, p&lt;0.01</math>)</i> | <i>n/s</i>                                          | <i>n/s</i> |                                                                                  |

| Month | Alboran Sea (red) | Transition (blue) | Balearic Sea (green) | S-D03.c (grey) |
|-------|-------------------|-------------------|----------------------|----------------|
| 3     | 180               | 320               | 100                  | 200            |
| 4     | 100               | 180               | 100                  | 100            |
| 5     | 100               | 180               | 100                  | 100            |
| 6     | 100               | 100               | 100                  | 100            |
| 7     | 100               | 100               | 100                  | 100            |
| 8     | 100               | 100               | 100                  | 100            |
| 9     | 100               | 100               | 100                  | 100            |
| 10    | 100               | 100               | 100                  | 100            |
| 11    | 100               | 100               | 100                  | 100            |
| 12    | 100               | 100               | 100                  | 100            |

### S-D03.b *Averages-n-Trends plots*

Clausocalanus arcuicornis (#/m3)  
Annual Average (m01-m12)

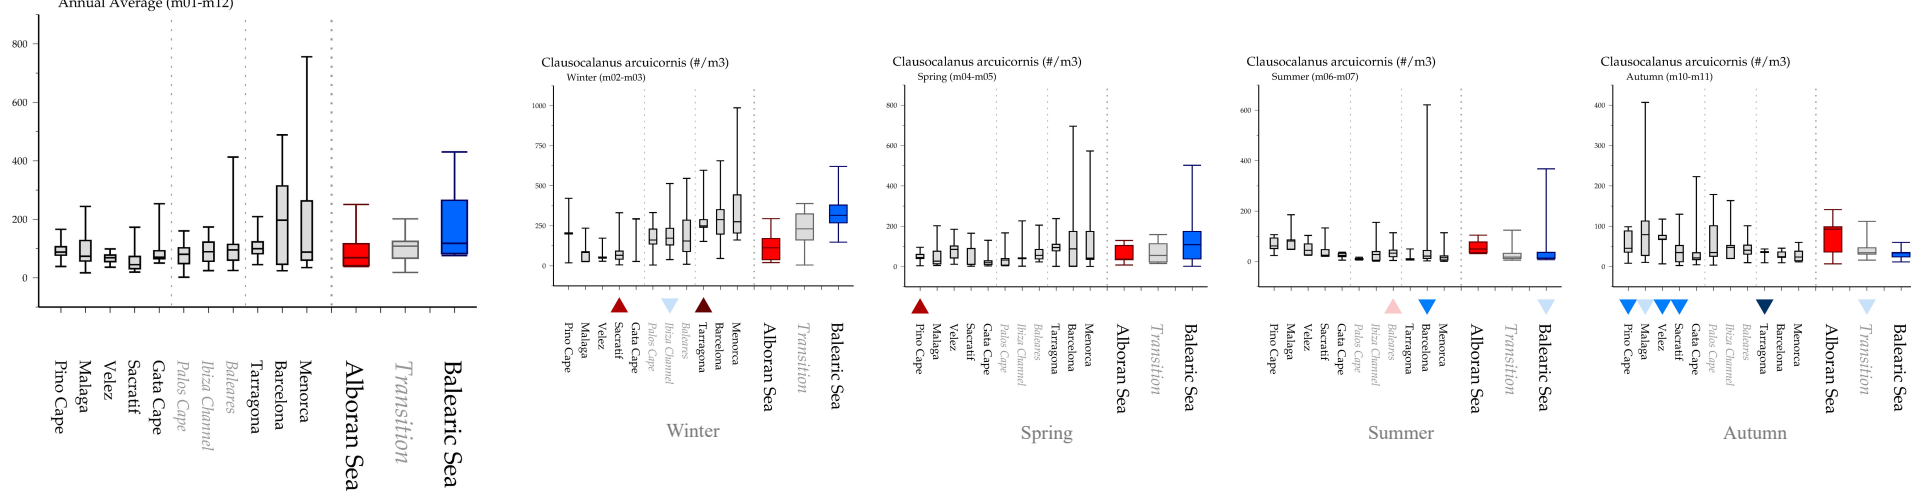

*Annual Average*

**Table S-D04** *Clausocalanus lividus* trends in the western Mediterranean Sea (2007-2017)

|                                           | Alboran Sea      |            |                                                                   |                                                                    |            | Transition |                                               |                                                                    | Balearic Sea                                   |                                                                     |            | <div><div>S-D04.c</div><div>Regional Averages Plot</div><div>Clausocalanus lividus</div><table><caption>Regional Averages Plot Data (Estimated)</caption><tr><th>Month</th><th>Abundance (#/m³)</th></tr><tr><td>1</td><td>~10</td></tr><tr><td>2</td><td>~20</td></tr><tr><td>3</td><td>~100</td></tr><tr><td>4</td><td>~140</td></tr><tr><td>5</td><td>~180</td></tr><tr><td>6</td><td>~170</td></tr><tr><td>7</td><td>~50</td></tr><tr><td>8</td><td>~30</td></tr><tr><td>9</td><td>~20</td></tr><tr><td>10</td><td>~10</td></tr><tr><td>11</td><td>~20</td></tr><tr><td>12</td><td>~30</td></tr></table></div> | Month | Abundance (#/m³) | 1 | ~10 | 2 | ~20 | 3 | ~100 | 4 | ~140 | 5 | ~180 | 6 | ~170 | 7 | ~50 | 8 | ~30 | 9 | ~20 | 10 | ~10 | 11 | ~20 | 12 | ~30 |
|-------------------------------------------|------------------|------------|-------------------------------------------------------------------|--------------------------------------------------------------------|------------|------------|-----------------------------------------------|--------------------------------------------------------------------|------------------------------------------------|---------------------------------------------------------------------|------------|--------------------------------------------------------------------------------------------------------------------------------------------------------------------------------------------------------------------------------------------------------------------------------------------------------------------------------------------------------------------------------------------------------------------------------------------------------------------------------------------------------------------------------------------------------------------------------------------------------------------|-------|------------------|---|-----|---|-----|---|------|---|------|---|------|---|------|---|-----|---|-----|---|-----|----|-----|----|-----|----|-----|
| Month                                     | Abundance (#/m³) |            |                                                                   |                                                                    |            |            |                                               |                                                                    |                                                |                                                                     |            |                                                                                                                                                                                                                                                                                                                                                                                                                                                                                                                                                                                                                    |       |                  |   |     |   |     |   |      |   |      |   |      |   |      |   |     |   |     |   |     |    |     |    |     |    |     |
| 1                                         | ~10              |            |                                                                   |                                                                    |            |            |                                               |                                                                    |                                                |                                                                     |            |                                                                                                                                                                                                                                                                                                                                                                                                                                                                                                                                                                                                                    |       |                  |   |     |   |     |   |      |   |      |   |      |   |      |   |     |   |     |   |     |    |     |    |     |    |     |
| 2                                         | ~20              |            |                                                                   |                                                                    |            |            |                                               |                                                                    |                                                |                                                                     |            |                                                                                                                                                                                                                                                                                                                                                                                                                                                                                                                                                                                                                    |       |                  |   |     |   |     |   |      |   |      |   |      |   |      |   |     |   |     |   |     |    |     |    |     |    |     |
| 3                                         | ~100             |            |                                                                   |                                                                    |            |            |                                               |                                                                    |                                                |                                                                     |            |                                                                                                                                                                                                                                                                                                                                                                                                                                                                                                                                                                                                                    |       |                  |   |     |   |     |   |      |   |      |   |      |   |      |   |     |   |     |   |     |    |     |    |     |    |     |
| 4                                         | ~140             |            |                                                                   |                                                                    |            |            |                                               |                                                                    |                                                |                                                                     |            |                                                                                                                                                                                                                                                                                                                                                                                                                                                                                                                                                                                                                    |       |                  |   |     |   |     |   |      |   |      |   |      |   |      |   |     |   |     |   |     |    |     |    |     |    |     |
| 5                                         | ~180             |            |                                                                   |                                                                    |            |            |                                               |                                                                    |                                                |                                                                     |            |                                                                                                                                                                                                                                                                                                                                                                                                                                                                                                                                                                                                                    |       |                  |   |     |   |     |   |      |   |      |   |      |   |      |   |     |   |     |   |     |    |     |    |     |    |     |
| 6                                         | ~170             |            |                                                                   |                                                                    |            |            |                                               |                                                                    |                                                |                                                                     |            |                                                                                                                                                                                                                                                                                                                                                                                                                                                                                                                                                                                                                    |       |                  |   |     |   |     |   |      |   |      |   |      |   |      |   |     |   |     |   |     |    |     |    |     |    |     |
| 7                                         | ~50              |            |                                                                   |                                                                    |            |            |                                               |                                                                    |                                                |                                                                     |            |                                                                                                                                                                                                                                                                                                                                                                                                                                                                                                                                                                                                                    |       |                  |   |     |   |     |   |      |   |      |   |      |   |      |   |     |   |     |   |     |    |     |    |     |    |     |
| 8                                         | ~30              |            |                                                                   |                                                                    |            |            |                                               |                                                                    |                                                |                                                                     |            |                                                                                                                                                                                                                                                                                                                                                                                                                                                                                                                                                                                                                    |       |                  |   |     |   |     |   |      |   |      |   |      |   |      |   |     |   |     |   |     |    |     |    |     |    |     |
| 9                                         | ~20              |            |                                                                   |                                                                    |            |            |                                               |                                                                    |                                                |                                                                     |            |                                                                                                                                                                                                                                                                                                                                                                                                                                                                                                                                                                                                                    |       |                  |   |     |   |     |   |      |   |      |   |      |   |      |   |     |   |     |   |     |    |     |    |     |    |     |
| 10                                        | ~10              |            |                                                                   |                                                                    |            |            |                                               |                                                                    |                                                |                                                                     |            |                                                                                                                                                                                                                                                                                                                                                                                                                                                                                                                                                                                                                    |       |                  |   |     |   |     |   |      |   |      |   |      |   |      |   |     |   |     |   |     |    |     |    |     |    |     |
| 11                                        | ~20              |            |                                                                   |                                                                    |            |            |                                               |                                                                    |                                                |                                                                     |            |                                                                                                                                                                                                                                                                                                                                                                                                                                                                                                                                                                                                                    |       |                  |   |     |   |     |   |      |   |      |   |      |   |      |   |     |   |     |   |     |    |     |    |     |    |     |
| 12                                        | ~30              |            |                                                                   |                                                                    |            |            |                                               |                                                                    |                                                |                                                                     |            |                                                                                                                                                                                                                                                                                                                                                                                                                                                                                                                                                                                                                    |       |                  |   |     |   |     |   |      |   |      |   |      |   |      |   |     |   |     |   |     |    |     |    |     |    |     |
| S-D04.a 11-year Trends                    | Pino Cape        | Málaga     | Vélez                                                             | Sacratif                                                           | Gata Cape  | Palos Cape | Ibiza Channel                                 | Baleares                                                           | Tarragona                                      | Barcelona                                                           | Menorca    |                                                                                                                                                                                                                                                                                                                                                                                                                                                                                                                                                                                                                    |       |                  |   |     |   |     |   |      |   |      |   |      |   |      |   |     |   |     |   |     |    |     |    |     |    |     |
| Annual Trend                              | <i>n</i> S       | <i>n</i> S | <i>marg</i> -signif<br>POS<br>( <i>r</i> =2.1655, <i>p</i> =0.10) | NEG *<br>( <i>r</i> =-3.4022, <i>p</i> =0.05)                      | <i>n</i> S | <i>n</i> S | <i>n</i> S                                    | <i>marg</i> -signif<br>NEG<br>( <i>r</i> =-2.1883, <i>p</i> =0.10) | <i>n</i> S                                     | <i>marg</i> -signif<br>NEG<br>( <i>r</i> =-14.3942, <i>p</i> =0.10) | <i>n</i> S |                                                                                                                                                                                                                                                                                                                                                                                                                                                                                                                                                                                                                    |       |                  |   |     |   |     |   |      |   |      |   |      |   |      |   |     |   |     |   |     |    |     |    |     |    |     |
| Winter Trend<br><i>m</i> 02 + <i>m</i> 03 | <i>n</i> S       | <i>n</i> S | <i>n</i> S                                                        | <i>n</i> S                                                         | X          | <i>n</i> S | NEG *<br>( <i>r</i> =-5.3000, <i>p</i> =0.05) | <i>n</i> S                                                         | <i>n</i> S                                     | <i>n</i> S                                                          | <i>n</i> S |                                                                                                                                                                                                                                                                                                                                                                                                                                                                                                                                                                                                                    |       |                  |   |     |   |     |   |      |   |      |   |      |   |      |   |     |   |     |   |     |    |     |    |     |    |     |
| Spring Trend<br><i>m</i> 04 + <i>m</i> 05 | <i>n</i> S       | <i>n</i> S | <i>n</i> S                                                        | NEG *<br>( <i>r</i> =-6.8390, <i>p</i> =0.05)                      | <i>n</i> S | <i>n</i> S | POS *<br>( <i>r</i> =20.3875, <i>p</i> =0.05) | NEG *<br>( <i>r</i> =-3.9625, <i>p</i> =0.05)                      | NEG *<br>( <i>r</i> =-35.8100, <i>p</i> =0.05) | NEG *<br>( <i>r</i> =-66.2400, <i>p</i> =0.05)                      | <i>n</i> S |                                                                                                                                                                                                                                                                                                                                                                                                                                                                                                                                                                                                                    |       |                  |   |     |   |     |   |      |   |      |   |      |   |      |   |     |   |     |   |     |    |     |    |     |    |     |
| Summer Trend<br><i>m</i> 06 + <i>m</i> 07 | <i>n</i> S       | <i>n</i> S | POS *<br>( <i>r</i> =-11.4557, <i>p</i> =0.05)                    | <i>n</i> S                                                         | <i>n</i> S | <i>n</i> S | NEG *<br>( <i>r</i> =-3.6604, <i>p</i> =0.05) | <i>n</i> S                                                         | NEG *<br>( <i>r</i> =-1.7750, <i>p</i> =0.05)  | NEG **<br>( <i>r</i> =-12.4900, <i>p</i> =0.01)                     | <i>n</i> S |                                                                                                                                                                                                                                                                                                                                                                                                                                                                                                                                                                                                                    |       |                  |   |     |   |     |   |      |   |      |   |      |   |      |   |     |   |     |   |     |    |     |    |     |    |     |
| Autumn Trend<br><i>m</i> 10 + <i>m</i> 11 | <i>n</i> S       | <i>n</i> S | <i>n</i> S                                                        | <i>marg</i> -signif<br>NEG<br>( <i>r</i> =-1.1667, <i>p</i> =0.10) | <i>n</i> S | <i>n</i> S | NEG *<br>( <i>r</i> =-6.3292, <i>p</i> =0.05) | <i>marg</i> -signif<br>NEG<br>( <i>r</i> =-1.5833, <i>p</i> =0.10) | NEG *<br>( <i>r</i> =-5.4500, <i>p</i> =0.05)  | <i>n</i> S                                                          | <i>n</i> S |                                                                                                                                                                                                                                                                                                                                                                                                                                                                                                                                                                                                                    |       |                  |   |     |   |     |   |      |   |      |   |      |   |      |   |     |   |     |   |     |    |     |    |     |    |     |

### S-D04.b *Averages-n-Trends plots*

Clausocalanus lividus (#/m3)

Annual Average (m01-m12)

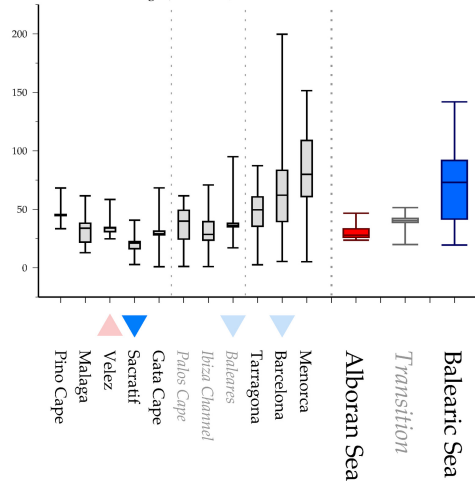

*Annual Average*

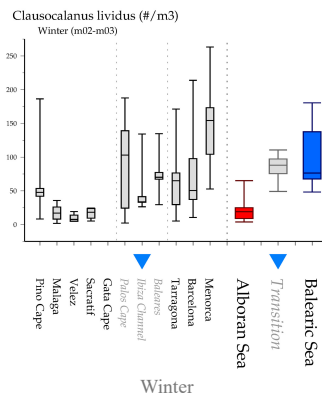

Winter

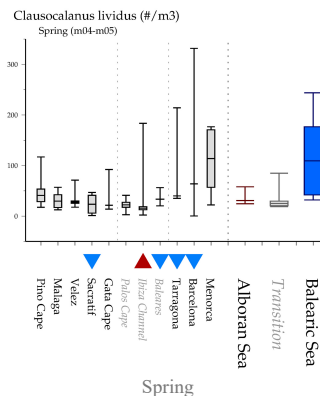

Spring

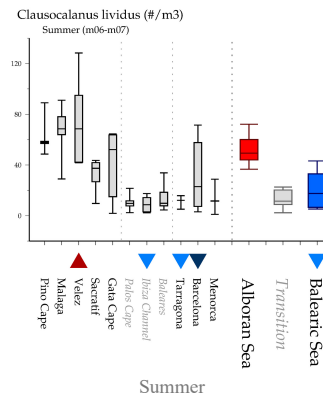

Summer

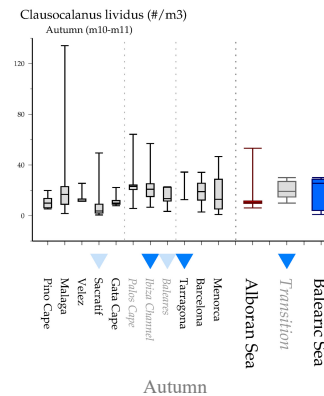

Autumn



Table S-D05 *Clausocalanus furcatus* trends in the western Mediterranean Sea (2007-2017)

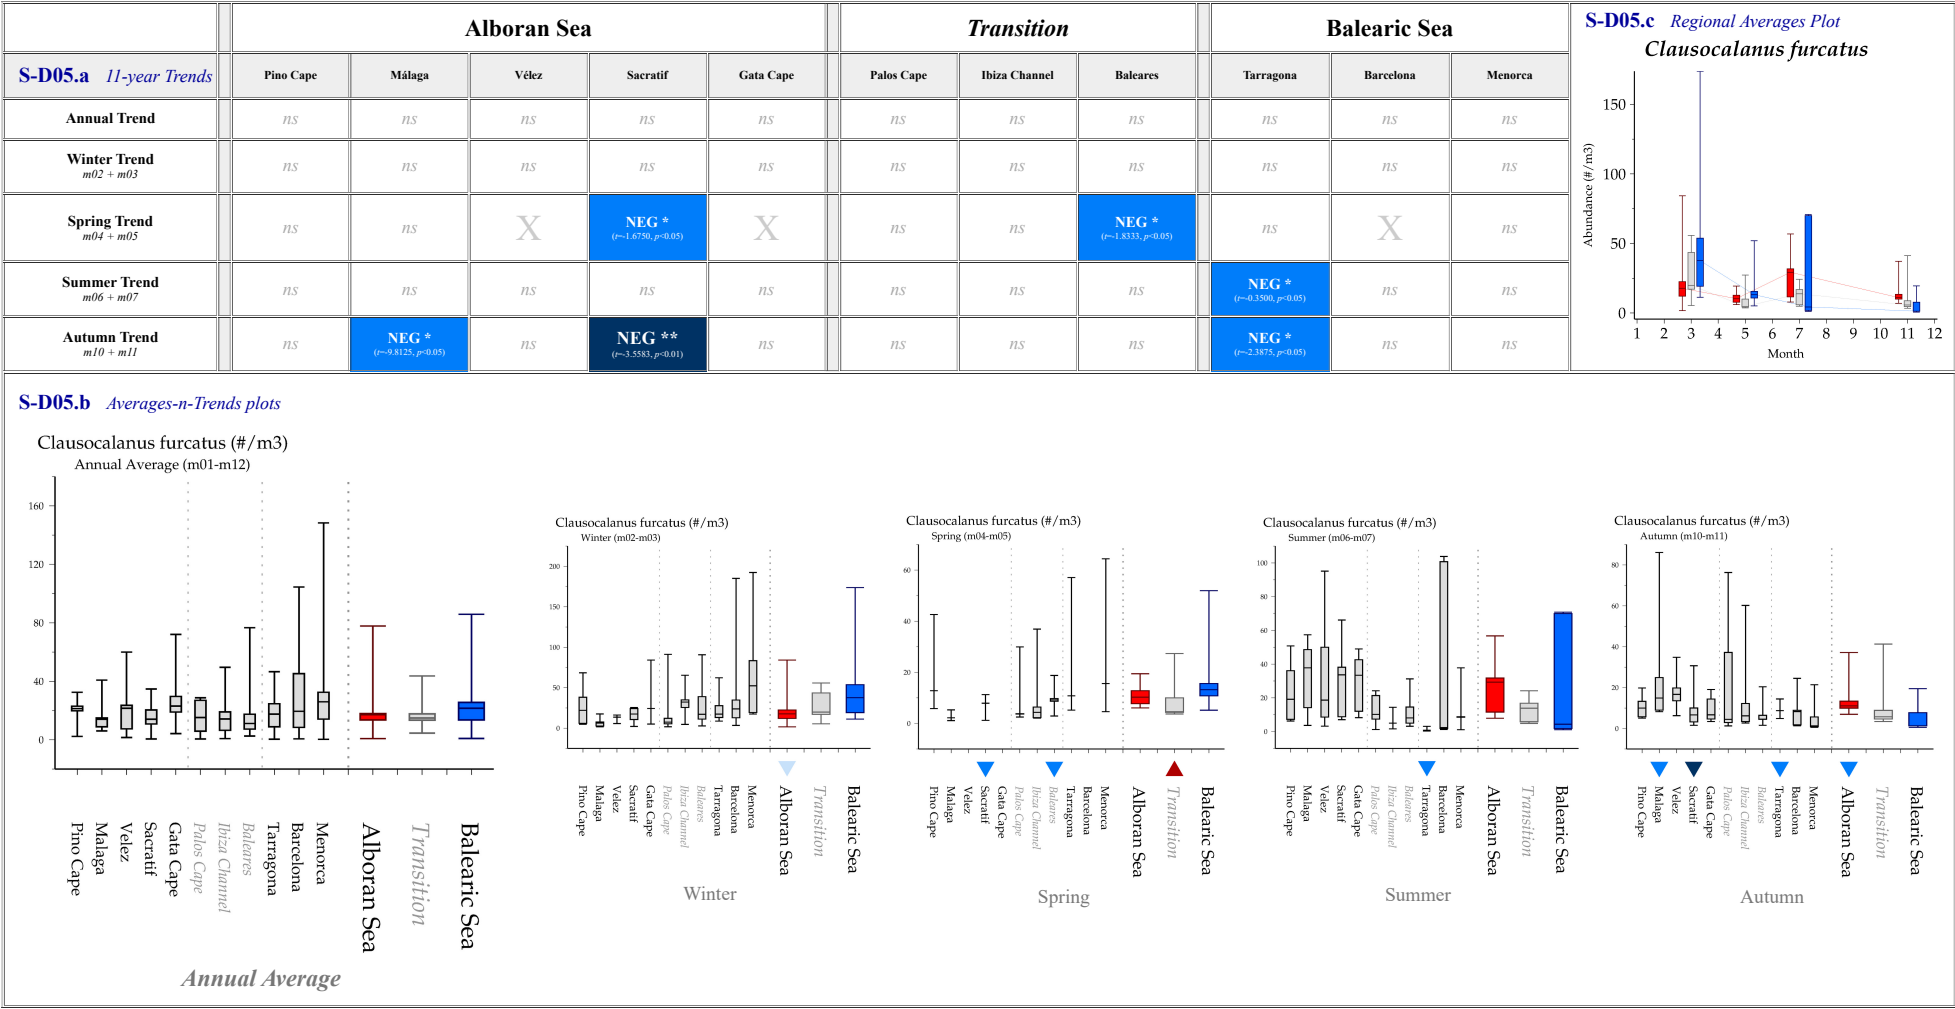

**Table S-D06** *Paracalanus parvus* trends in the western Mediterranean Sea (2007-2017)

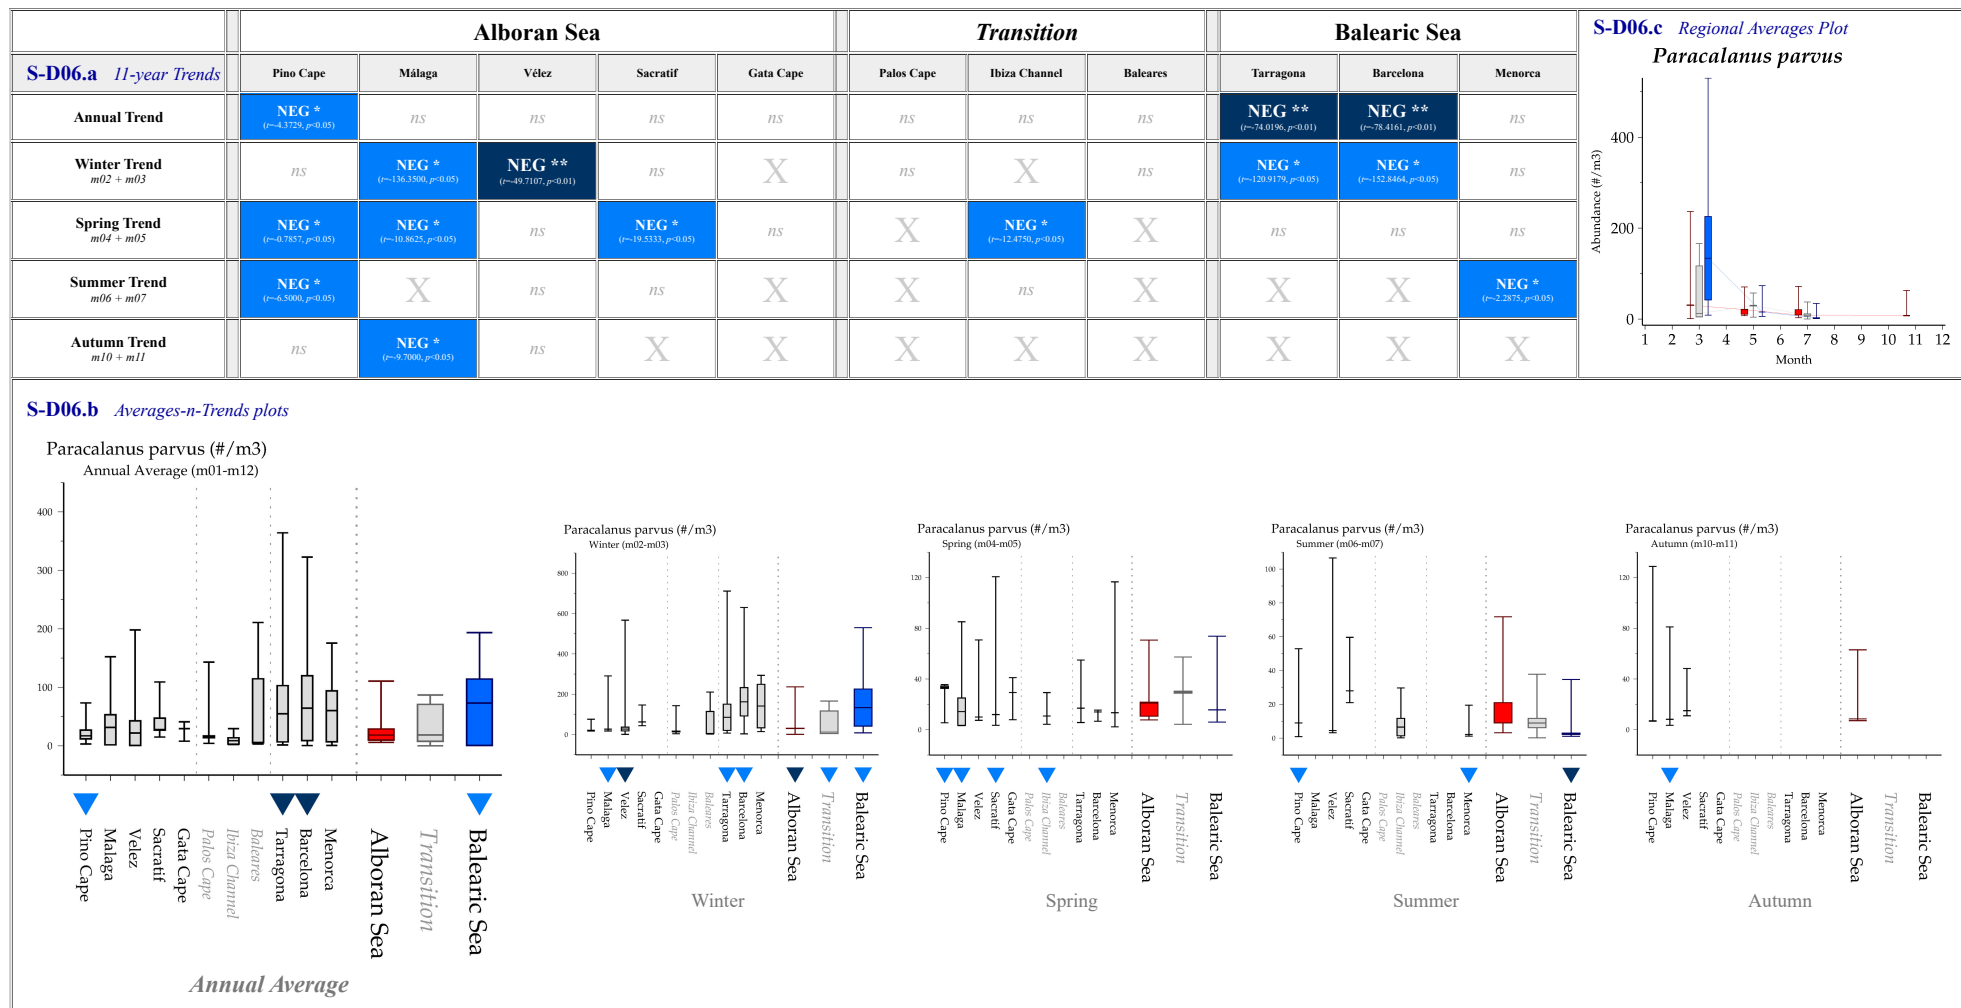

**Table S-D07** *Centropages typicus* trends in the western Mediterranean Sea (2007-2017)

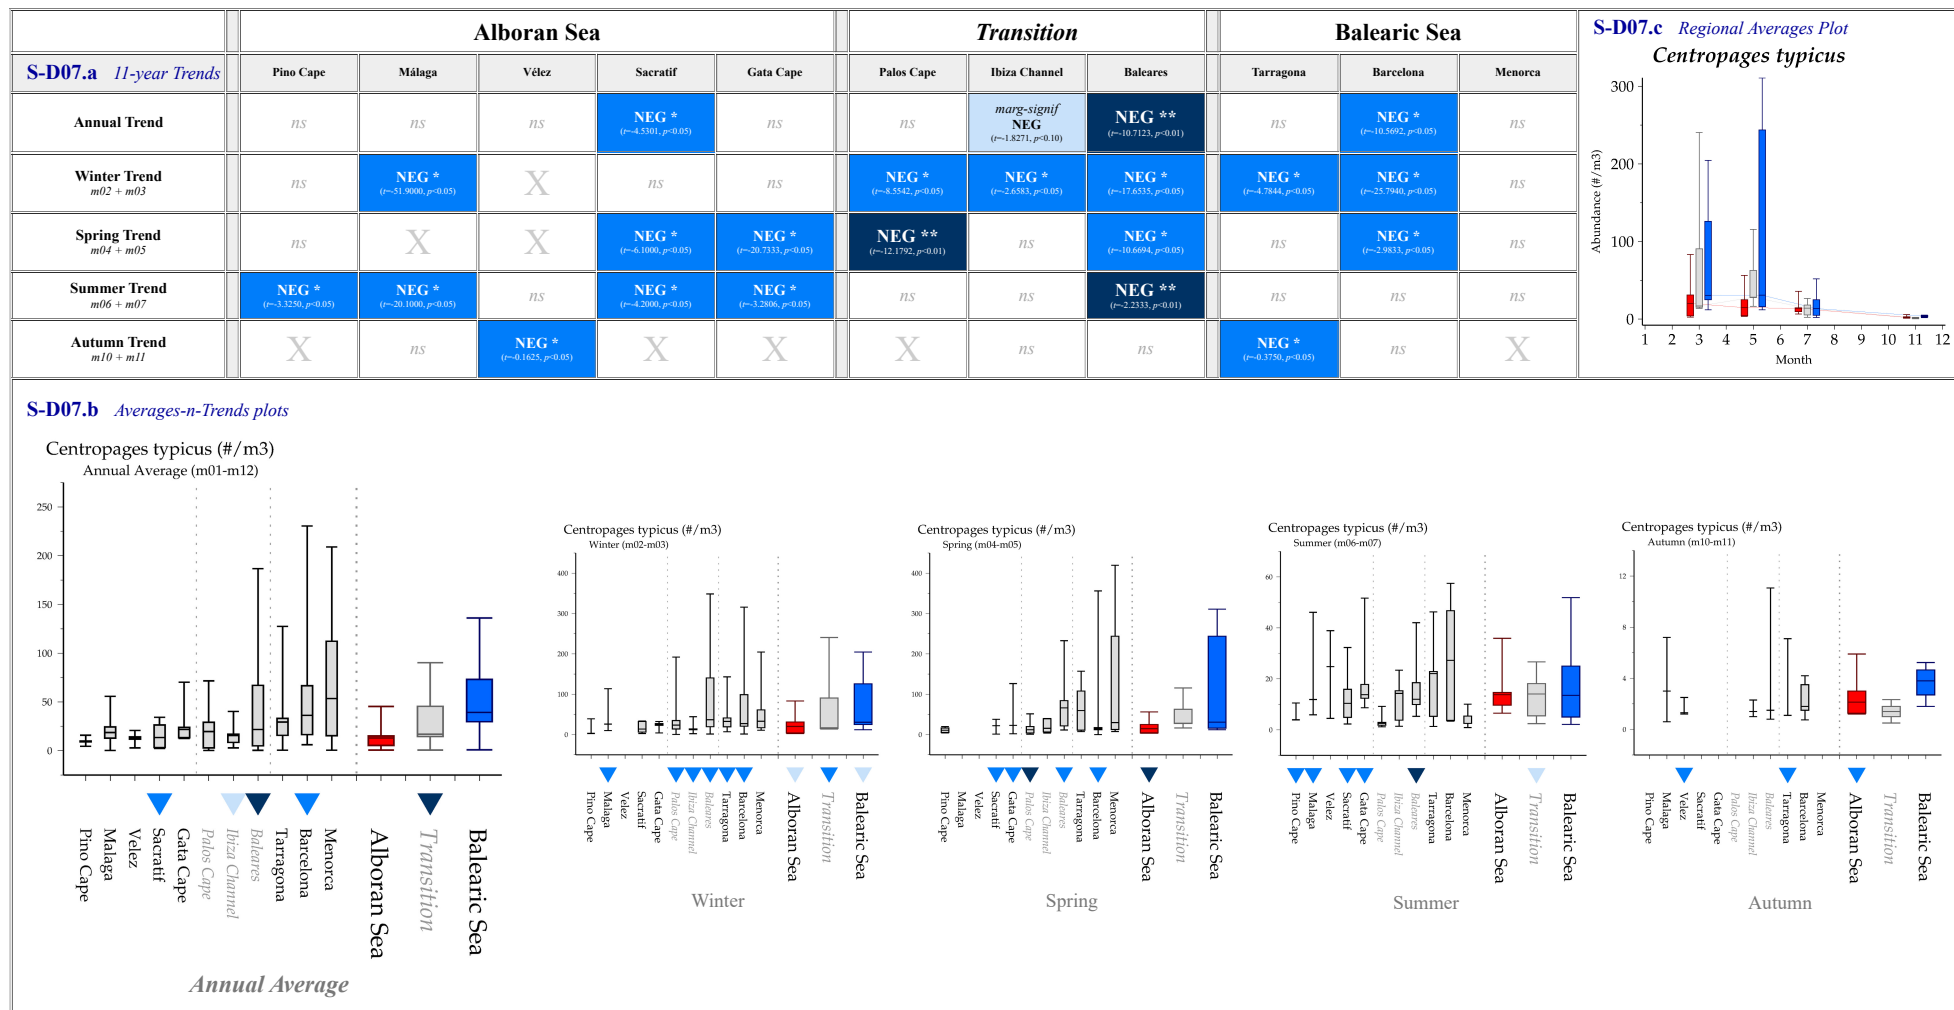

**S-D07.c** *Regional Averages Plot*  
*Centropages typicus*

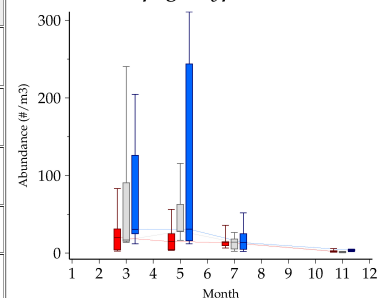

**Table S-D08** *Temora stylifera* trends in the western Mediterranean Sea (2007-2017)

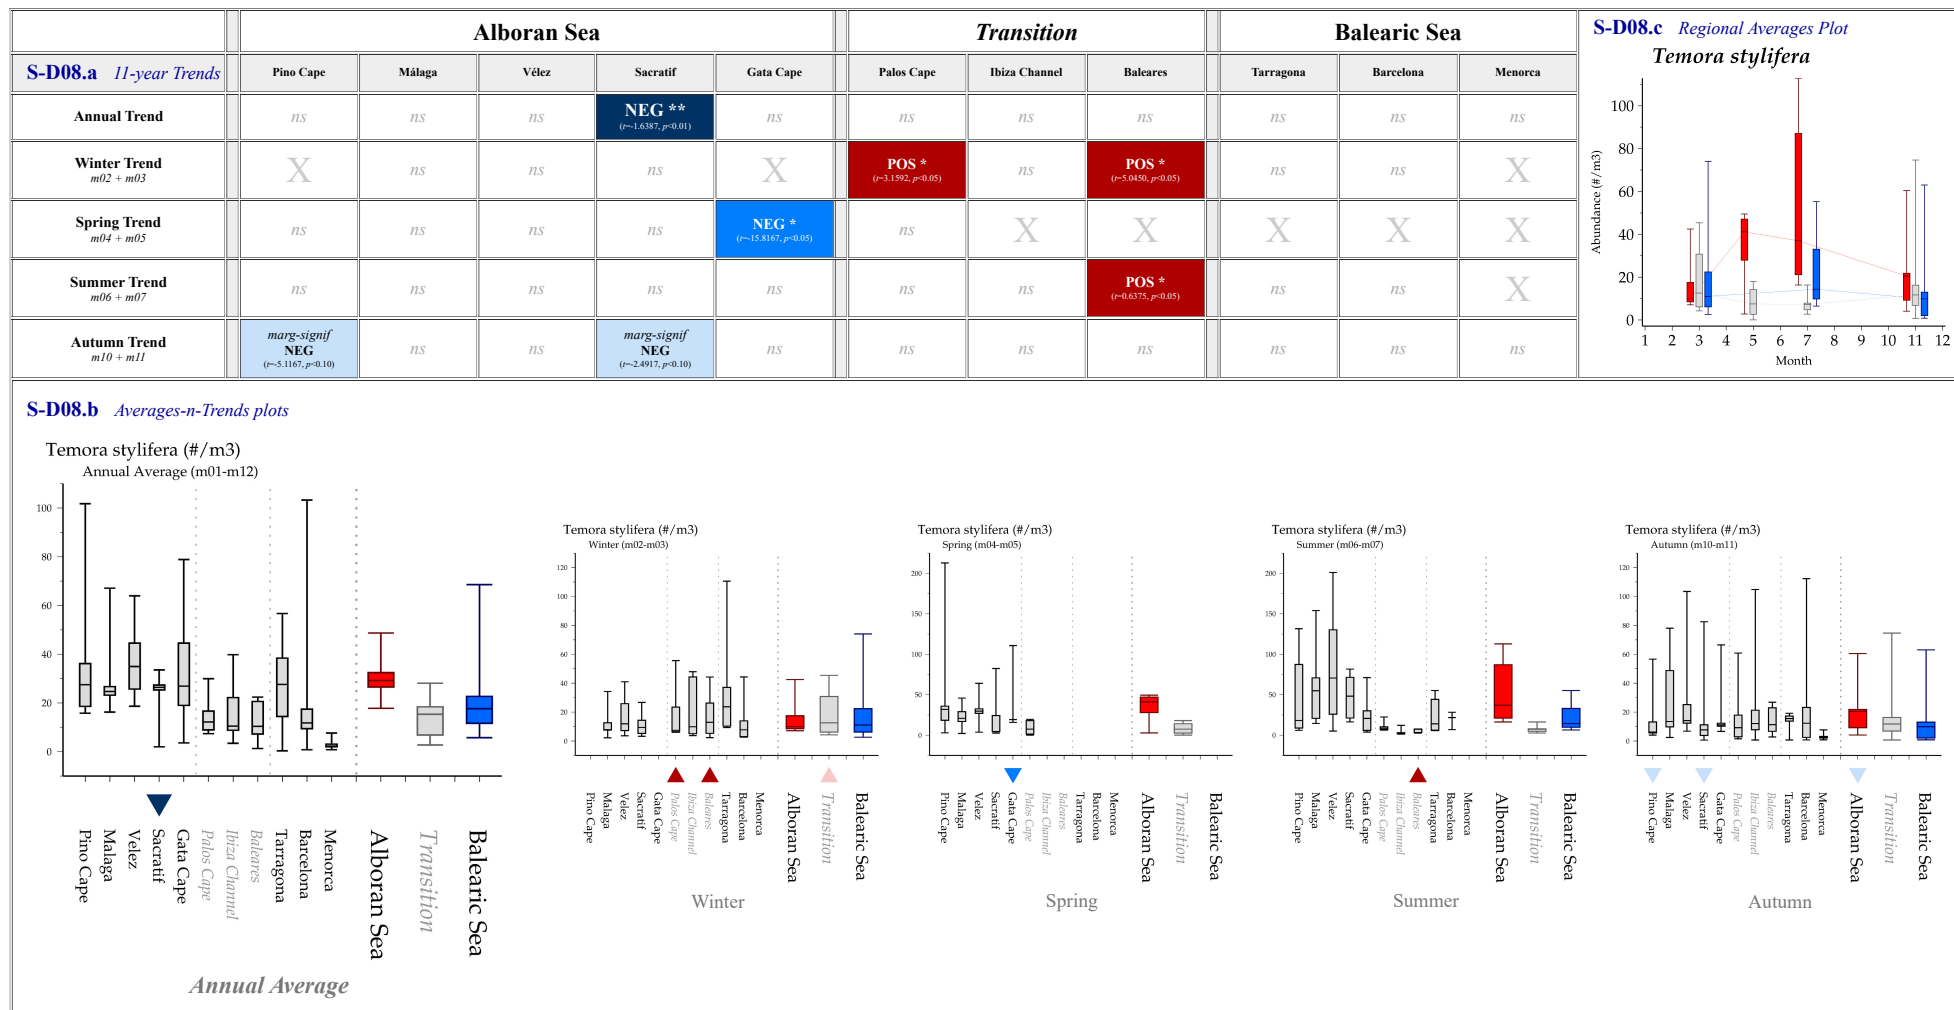

**Table S-D09** *Calanus helgolandicus* trends in the western Mediterranean Sea (2007-2017)

</

Table S-D10 *Eucalanus monachus* trends in the western Mediterranean Sea (2007-2017)

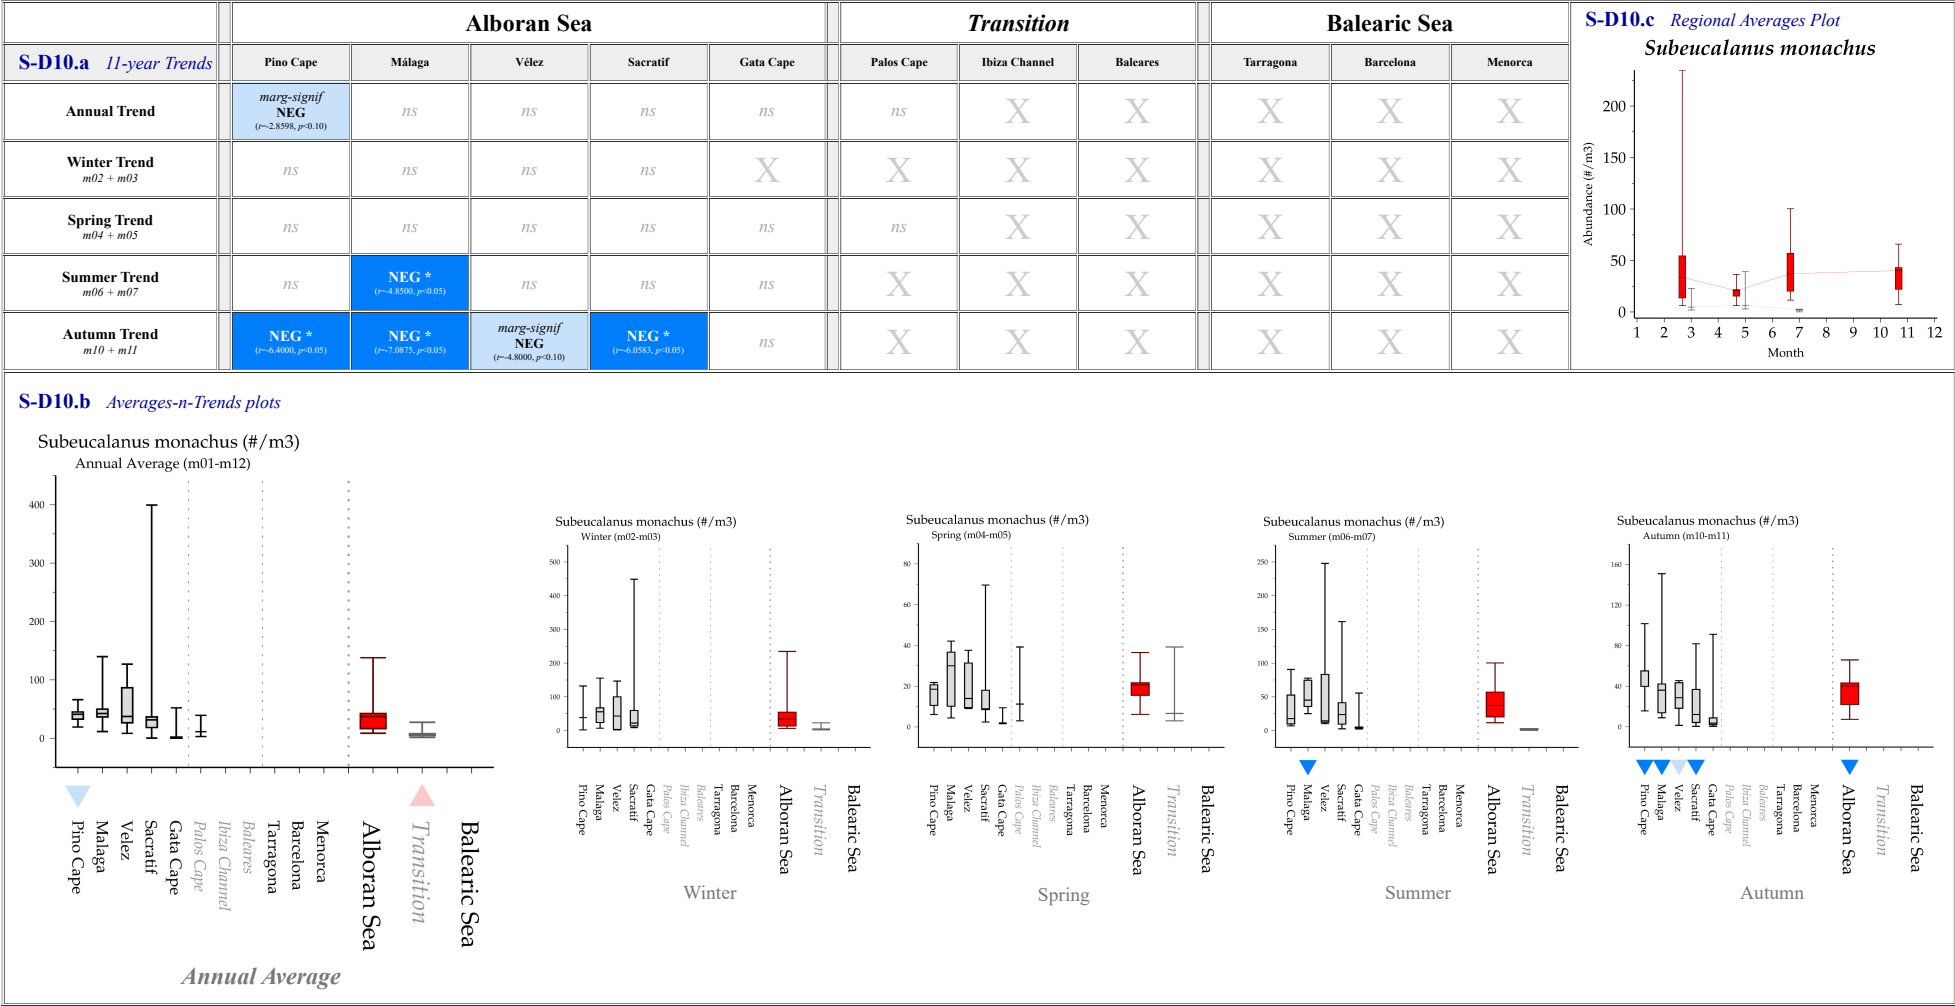

**Table S-D11** *Acartia clausi* trends in the western Mediterranean Sea (2007-2017)

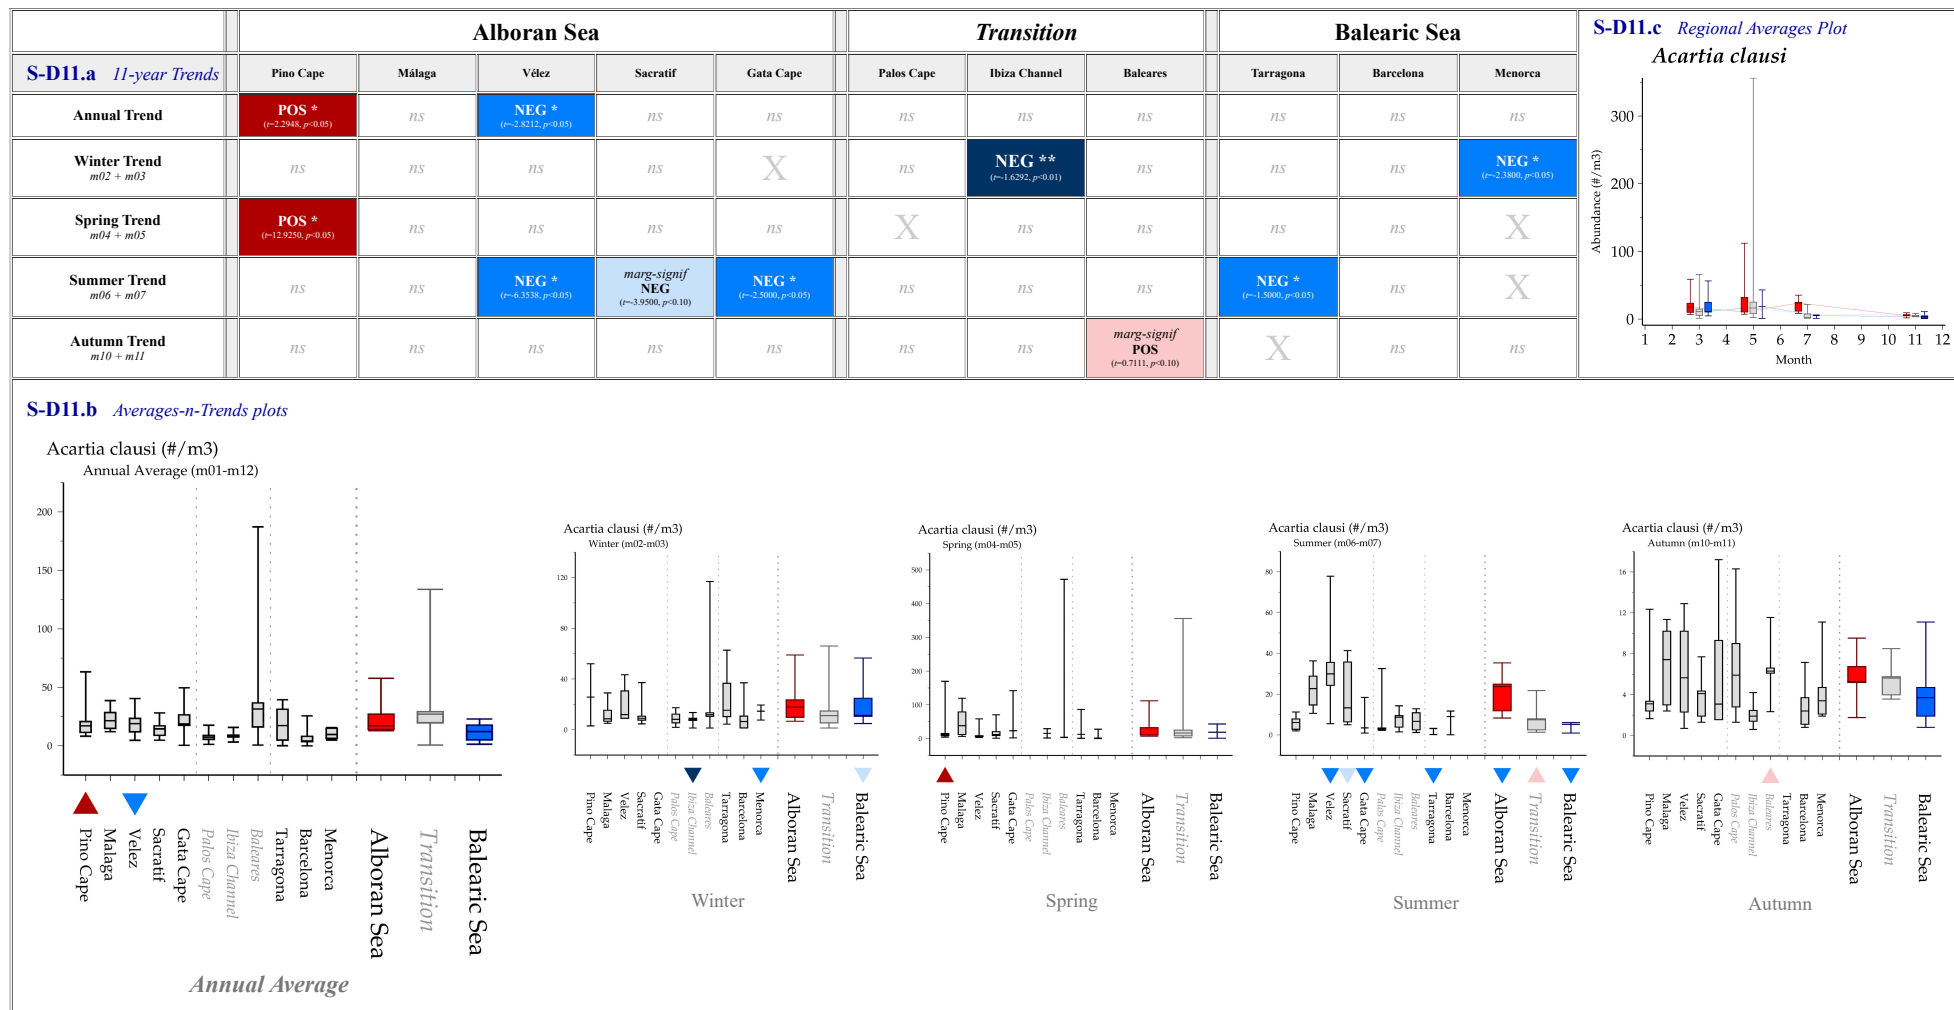

Supplement: s1 [file s1]
