# Supplementary material
Source: MDPI journal article supplement (https://www.mdpi.com/2073-4441/15/24/4267)

**Table S-A01** Sea Surface Temperature (°C) trends in the western Mediterranean Sea (2007-2017)

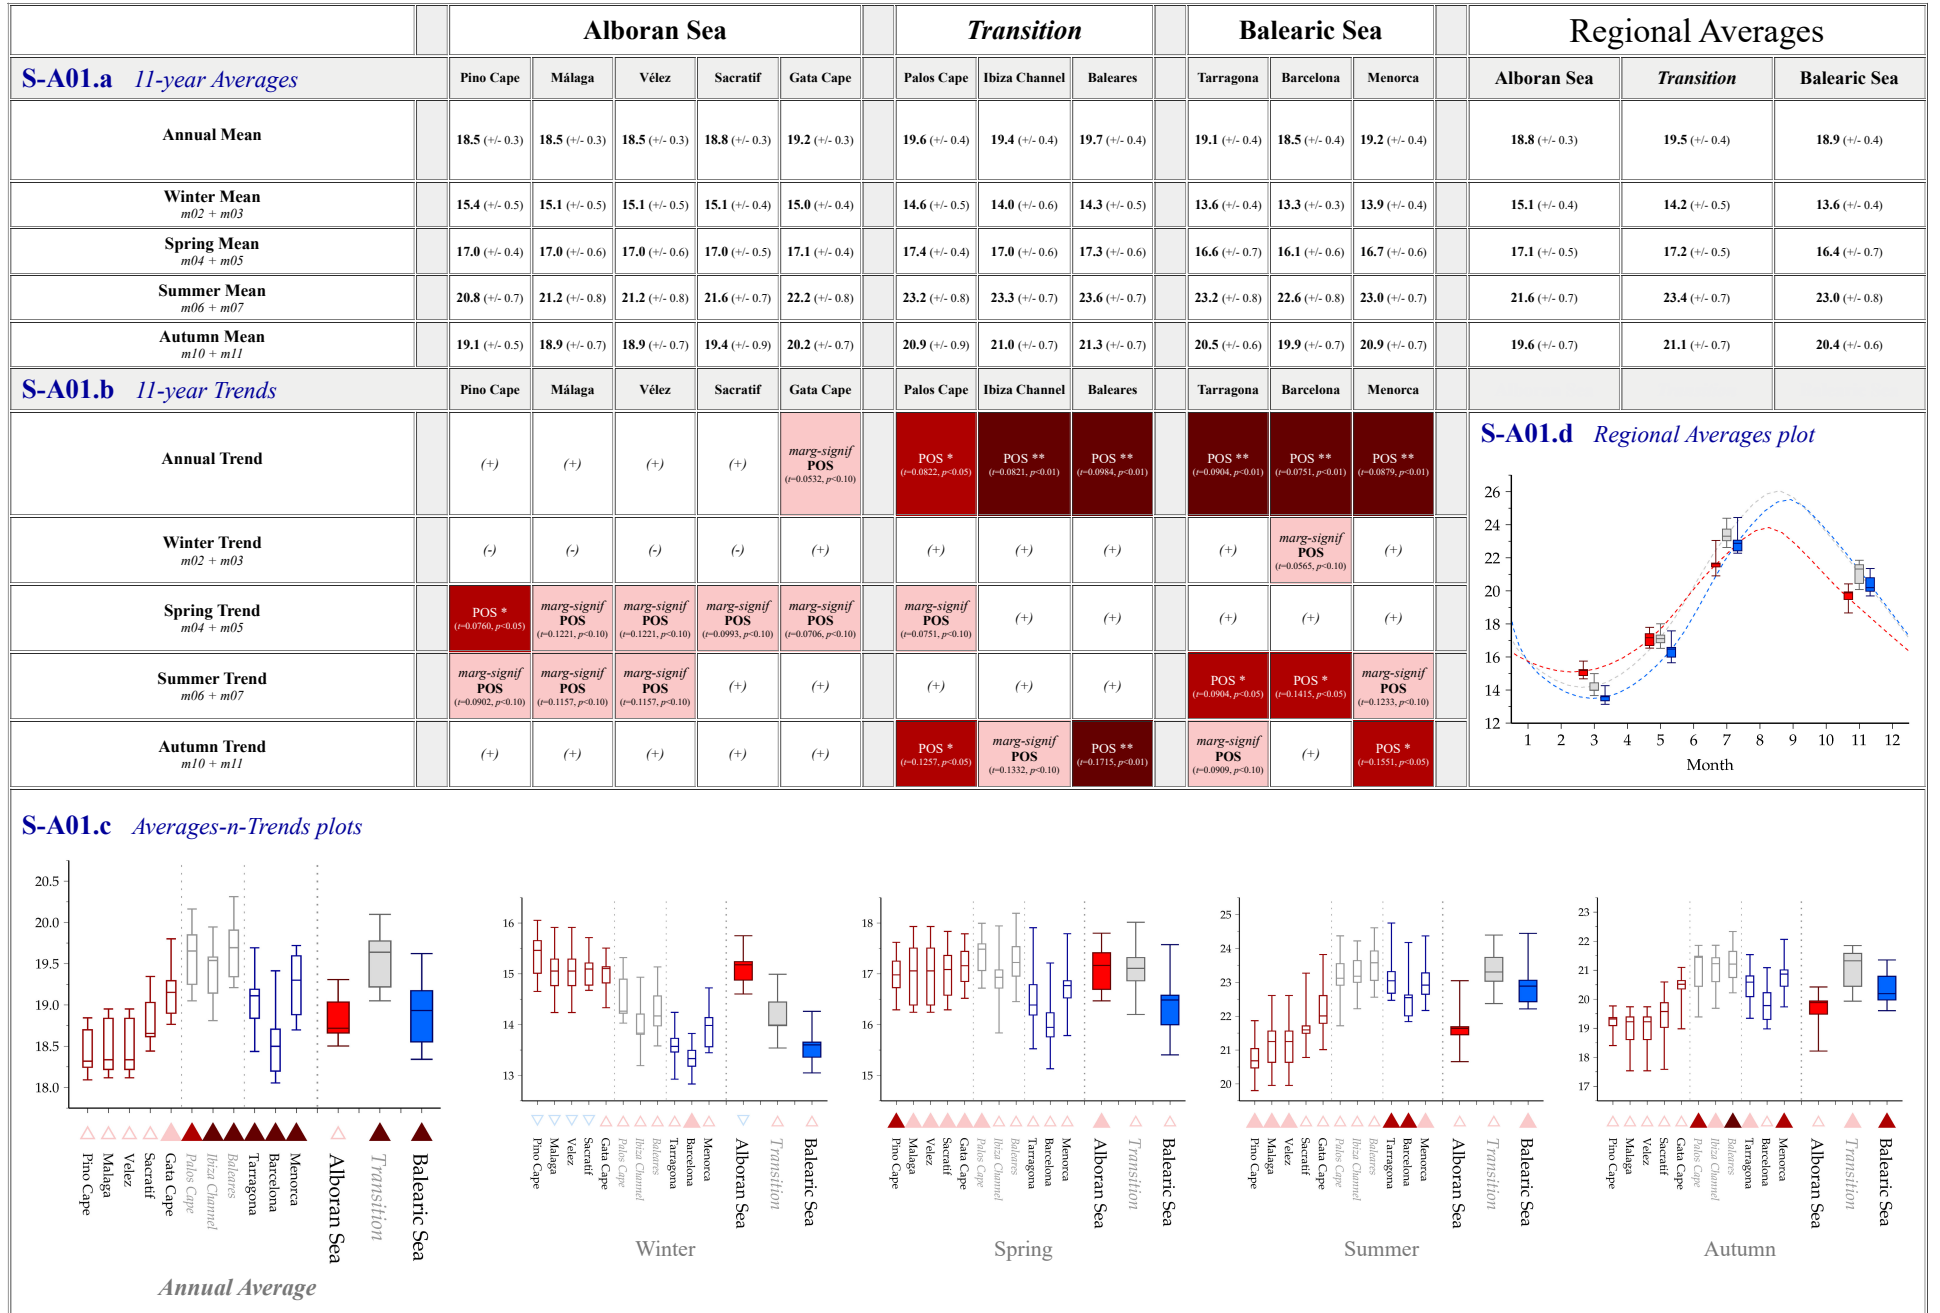

Table S-A02 Surface Salinity trends in the western Mediterranean Sea (2007-2017)

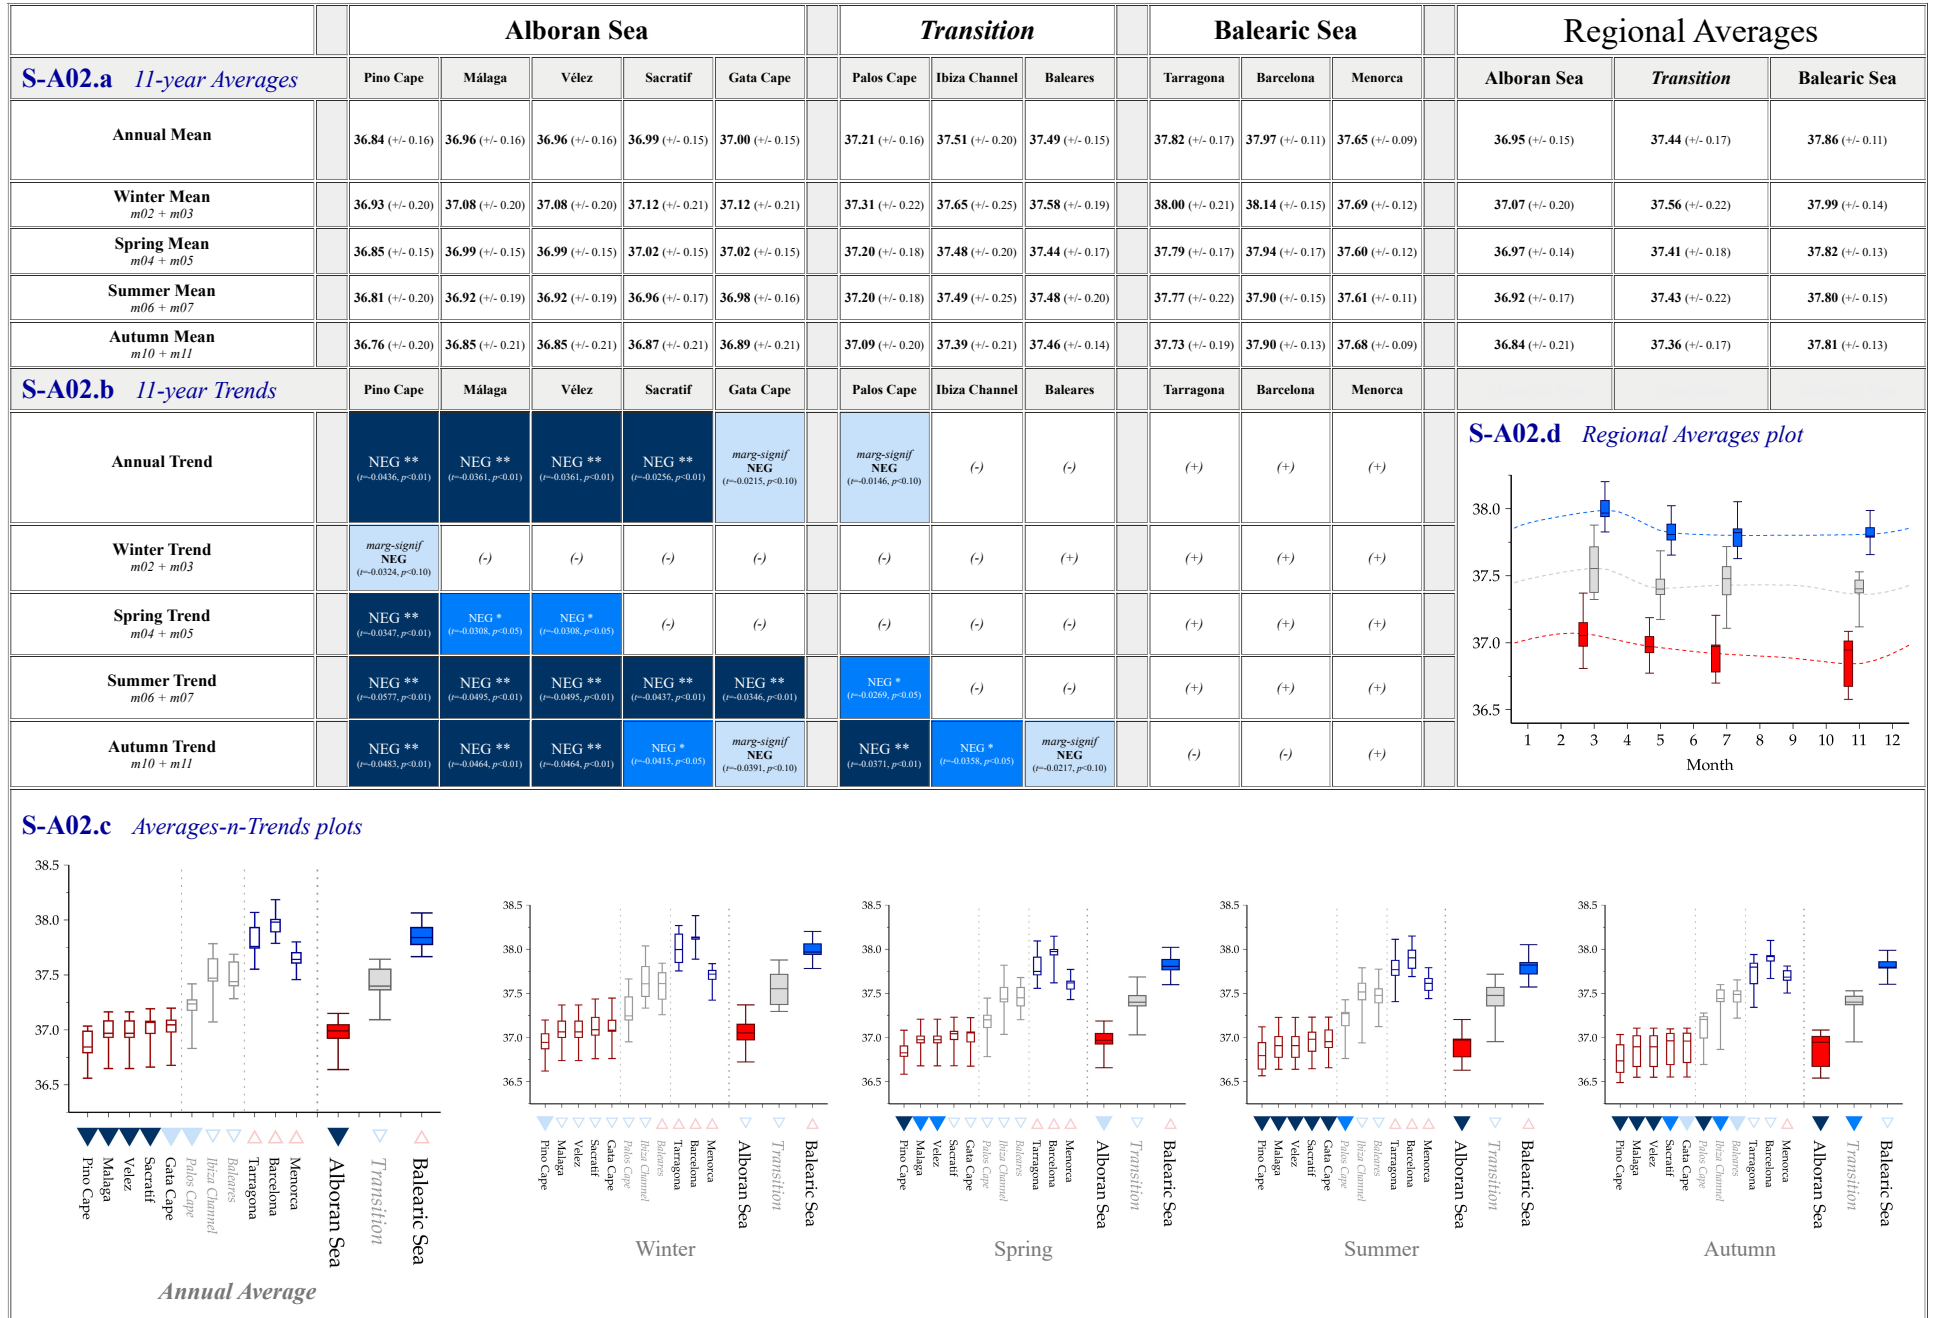



**Table S-A03**    **Scalar Surface Wind ( $\text{m s}^{-1}$ ) trends in the western Mediterranean Sea (2007-2017)**

|         |                           | Alboran Sea                                           |                                             |                                             |                                                       |                                                       |  | <i>Transition</i>                                     |                                              |                                                       |  | Balearic Sea                                 |                                                       |                                                       |  | Regional Averages              |               |               |
|---------|---------------------------|-------------------------------------------------------|---------------------------------------------|---------------------------------------------|-------------------------------------------------------|-------------------------------------------------------|--|-------------------------------------------------------|----------------------------------------------|-------------------------------------------------------|--|----------------------------------------------|-------------------------------------------------------|-------------------------------------------------------|--|--------------------------------|---------------|---------------|
| S-A03.a | 11-year Averages          | Pino Cape                                             | Málaga                                      | Vélez                                       | Sacratif                                              | Gata Cape                                             |  | Palos Cape                                            | Ibiza Channel                                | Baleares                                              |  | Tarragona                                    | Barcelona                                             | Menorca                                               |  | Alboran Sea                    | Transition    | Balearic Sea  |
|         | Annual Mean               | 7.3 (+/- 0.4)                                         | 7.3 (+/- 0.3)                               | 7.3 (+/- 0.3)                               | 7.6 (+/- 0.4)                                         | 7.5 (+/- 0.3)                                         |  | 6.8 (+/- 0.2)                                         | 6.4 (+/- 0.3)                                | 6.5 (+/- 0.5)                                         |  | 6.7 (+/- 0.5)                                | 6.0 (+/- 0.3)                                         | 7.5 (+/- 0.5)                                         |  | 7.4 (+/- 0.4)                  | 6.5 (+/- 0.3) | 6.7 (+/- 0.3) |
|         | Winter Mean<br>m02 + m03  | 8.6 (+/- 0.7)                                         | 8.8 (+/- 0.7)                               | 8.8 (+/- 0.7)                               | 9.5 (+/- 0.9)                                         | 8.7 (+/- 0.8)                                         |  | 7.6 (+/- 0.8)                                         | 7.3 (+/- 0.9)                                | 7.7 (+/- 1.1)                                         |  | 7.7 (+/- 1.0)                                | 6.5 (+/- 0.5)                                         | 9.4 (+/- 1.5)                                         |  | 9.0 (+/- 0.7)                  | 7.5 (+/- 0.7) | 7.8 (+/- 0.7) |
|         | Spring Mean<br>m04 + m05  | 7.4 (+/- 1.0)                                         | 7.5 (+/- 1.0)                               | 7.5 (+/- 1.0)                               | 8.1 (+/- 0.8)                                         | 8.0 (+/- 0.4)                                         |  | 6.8 (+/- 0.5)                                         | 6.1 (+/- 0.8)                                | 6.0 (+/- 0.9)                                         |  | 6.4 (+/- 1.1)                                | 5.7 (+/- 0.8)                                         | 7.2 (+/- 0.8)                                         |  | 7.8 (+/- 0.7)                  | 6.2 (+/- 0.7) | 6.3 (+/- 0.6) |
|         | Summer Mean<br>m06 + m07  | 7.0 (+/- 1.0)                                         | 6.5 (+/- 0.9)                               | 6.5 (+/- 0.9)                               | 6.2 (+/- 0.4)                                         | 6.7 (+/- 0.3)                                         |  | 6.0 (+/- 0.6)                                         | 5.6 (+/- 0.7)                                | 5.4 (+/- 0.6)                                         |  | 5.3 (+/- 0.7)                                | 5.2 (+/- 0.7)                                         | 5.8 (+/- 0.6)                                         |  | 6.5 (+/- 0.6)                  | 5.6 (+/- 0.5) | 5.5 (+/- 0.6) |
|         | Autumn Mean<br>m10 + m11  | 6.9 (+/- 0.9)                                         | 7.0 (+/- 1.0)                               | 7.0 (+/- 1.0)                               | 7.2 (+/- 1.0)                                         | 7.1 (+/- 1.0)                                         |  | 6.8 (+/- 0.8)                                         | 6.7 (+/- 0.8)                                | 6.6 (+/- 0.7)                                         |  | 7.5 (+/- 1.1)                                | 6.4 (+/- 0.5)                                         | 8.1 (+/- 1.1)                                         |  | 7.0 (+/- 0.9)                  | 6.7 (+/- 0.7) | 7.3 (+/- 0.6) |
| S-A03.b | 11-year Trends            | Pino Cape                                             | Málaga                                      | Vélez                                       | Sacratif                                              | Gata Cape                                             |  | Palos Cape                                            | Ibiza Channel                                | Baleares                                              |  | Tarragona                                    | Barcelona                                             | Menorca                                               |  |                                |               |               |
|         | Annual Trend              | NEG *<br><small>(r=-0.0064, p=0.05)</small>           | NEG *<br><small>(r=-0.0091, p=0.05)</small> | NEG *<br><small>(r=-0.0091, p=0.05)</small> | NEG *<br><small>(r=-0.0092, p=0.05)</small>           | (-)                                                   |  | marg-signif NEG<br><small>(r=-0.0032, p=0.10)</small> | NEG **<br><small>(r=-0.0081, p=0.01)</small> | marg-signif NEG<br><small>(r=-0.0118, p=0.10)</small> |  | NEG **<br><small>(r=-0.0183, p=0.01)</small> | NEG **<br><small>(r=-0.0053, p=0.01)</small>          | (-)                                                   |  | S-A03.d Regional Averages plot |               |               |
|         | Winter Trend<br>m02 + m03 | (+)                                                   | (+)                                         | (+)                                         | marg-signif POS<br><small>(r=0.0079, p=0.10)</small>  | (+)                                                   |  | (+)                                                   | (+)                                          | (+)                                                   |  | (-)                                          | (+)                                                   | (-)                                                   |  |                                |               |               |
|         | Spring Trend<br>m04 + m05 | NEG **<br><small>(r=-0.0271, p=0.01)</small>          | NEG *<br><small>(r=-0.0249, p=0.05)</small> | NEG *<br><small>(r=-0.0249, p=0.05)</small> | marg-signif NEG<br><small>(r=-0.0183, p=0.10)</small> | marg-signif NEG<br><small>(r=-0.0084, p=0.10)</small> |  | (-)                                                   | (-)                                          | (-)                                                   |  | NEG *<br><small>(r=-0.0342, p=0.05)</small>  | marg-signif NEG<br><small>(r=-0.0198, p=0.10)</small> | NEG *<br><small>(r=-0.0227, p=0.05)</small>           |  |                                |               |               |
|         | Summer Trend<br>m06 + m07 | marg-signif NEG<br><small>(r=-0.0274, p=0.10)</small> | NEG *<br><small>(r=-0.0203, p=0.05)</small> | NEG *<br><small>(r=-0.0203, p=0.05)</small> | (-)                                                   | (-)                                                   |  | (-)                                                   | (-)                                          | marg-signif NEG<br><small>(r=-0.0140, p=0.10)</small> |  | NEG **<br><small>(r=-0.0281, p=0.01)</small> | (-)                                                   | (-)                                                   |  |                                |               |               |
|         | Autumn Trend<br>m10 + m11 | (-)                                                   | (-)                                         | (-)                                         | marg-signif NEG<br><small>(r=-0.0287, p=0.10)</small> | (-)                                                   |  | marg-signif NEG<br><small>(r=-0.0156, p=0.10)</small> | NEG *<br><small>(r=-0.0179, p=0.05)</small>  | (-)                                                   |  | NEG *<br><small>(r=-0.0298, p=0.05)</small>  | NEG *<br><small>(r=-0.0149, p=0.05)</small>           | marg-signif NEG<br><small>(r=-0.0205, p=0.10)</small> |  |                                |               |               |
|         |                           |                                                       |                                             |                                             |                                                       |                                                       |  |                                                       |                                              |                                                       |  |                                              |                                                       |                                                       |  |                                |               |               |

### S-A03.c *Averages-n-Trends plots*

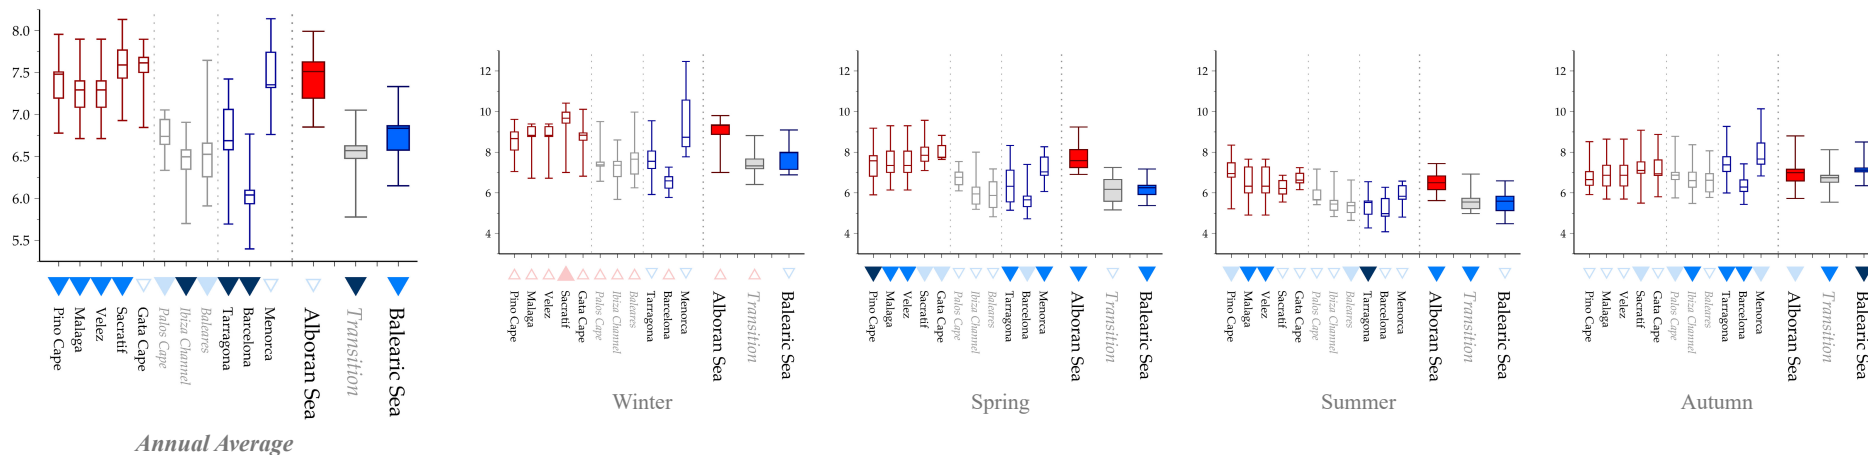

**Table S-A04** Satellite Chlorophyll ( $\text{mg m}^{-3}$ ) trends in the western Mediterranean Sea (2007-2017)

|                                  |  | Alboran Sea                                                       |                                                |                                                |                 |                                                                   | Transition                                                        |                                                |                                                | Balearic Sea                                  |                 |                                                                   | Regional Averages              |                 |                 |
|----------------------------------|--|-------------------------------------------------------------------|------------------------------------------------|------------------------------------------------|-----------------|-------------------------------------------------------------------|-------------------------------------------------------------------|------------------------------------------------|------------------------------------------------|-----------------------------------------------|-----------------|-------------------------------------------------------------------|--------------------------------|-----------------|-----------------|
| S-A04.a 11-year Averages         |  | Pino Cape                                                         | Málaga                                         | Vélez                                          | Sacratif        | Gata Cape                                                         | Palos Cape                                                        | Ibiza Channel                                  | Balears                                        | Tarragona                                     | Barcelona       | Menorca                                                           | Alboran Sea                    | Transition      | Balearic Sea    |
| Annual Mean                      |  | 0.65 (+/- 0.06)                                                   | 0.82 (+/- 0.13)                                | 0.82 (+/- 0.13)                                | 0.53 (+/- 0.06) | 0.41 (+/- 0.06)                                                   | 0.54 (+/- 0.07)                                                   | 0.37 (+/- 0.05)                                | 0.21 (+/- 0.03)                                | 0.31 (+/- 0.04)                               | 0.37 (+/- 0.04) | 0.23 (+/- 0.03)                                                   | 0.59 (+/- 0.07)                | 0.30 (+/- 0.03) | 0.31 (+/- 0.03) |
| Winter Mean<br><i>m02 + m03</i>  |  | 0.76 (+/- 0.10)                                                   | 1.10 (+/- 0.24)                                | 1.10 (+/- 0.24)                                | 0.76 (+/- 0.14) | 0.64 (+/- 0.14)                                                   | 0.69 (+/- 0.15)                                                   | 0.56 (+/- 0.10)                                | 0.38 (+/- 0.10)                                | 0.54 (+/- 0.12)                               | 0.60 (+/- 0.11) | 0.46 (+/- 0.09)                                                   | 0.84 (+/- 0.14)                | 0.48 (+/- 0.09) | 0.56 (+/- 0.08) |
| Spring Mean<br><i>m04 + m05</i>  |  | 0.69 (+/- 0.19)                                                   | 1.00 (+/- 0.47)                                | 1.00 (+/- 0.47)                                | 0.55 (+/- 0.23) | 0.40 (+/- 0.18)                                                   | 0.50 (+/- 0.11)                                                   | 0.38 (+/- 0.13)                                | 0.17 (+/- 0.04)                                | 0.31 (+/- 0.09)                               | 0.43 (+/- 0.13) | 0.22 (+/- 0.07)                                                   | 0.63 (+/- 0.25)                | 0.26 (+/- 0.05) | 0.32 (+/- 0.09) |
| Summer Mean<br><i>m06 + m07</i>  |  | 0.59 (+/- 0.09)                                                   | 0.57 (+/- 0.22)                                | 0.57 (+/- 0.22)                                | 0.29 (+/- 0.04) | 0.19 (+/- 0.02)                                                   | 0.38 (+/- 0.09)                                                   | 0.22 (+/- 0.04)                                | 0.11 (+/- 0.02)                                | 0.19 (+/- 0.08)                               | 0.21 (+/- 0.04) | 0.11 (+/- 0.02)                                                   | 0.38 (+/- 0.08)                | 0.17 (+/- 0.03) | 0.16 (+/- 0.03) |
| Autumn Mean<br><i>m10 + m11</i>  |  | 0.64 (+/- 0.11)                                                   | 0.76 (+/- 0.19)                                | 0.76 (+/- 0.19)                                | 0.55 (+/- 0.20) | 0.37 (+/- 0.09)                                                   | 0.52 (+/- 0.08)                                                   | 0.35 (+/- 0.08)                                | 0.18 (+/- 0.01)                                | 0.25 (+/- 0.02)                               | 0.34 (+/- 0.06) | 0.18 (+/- 0.02)                                                   | 0.57 (+/- 0.14)                | 0.27 (+/- 0.02) | 0.25 (+/- 0.02) |
| S-A04.b 11-year Trends           |  | Pino Cape                                                         | Málaga                                         | Vélez                                          | Sacratif        | Gata Cape                                                         | Palos Cape                                                        | Ibiza Channel                                  | Balears                                        | Tarragona                                     | Barcelona       | Menorca                                                           |                                |                 |                 |
| Annual Trend                     |  | <i>marg-signif</i><br>NEG<br>( <i>r</i> =-0.0099, <i>p</i> <0.10) | NEG **<br>( <i>r</i> =-0.0409, <i>p</i> <0.01) | NEG **<br>( <i>r</i> =-0.0409, <i>p</i> <0.01) | (-)             | (-)                                                               | NEG **<br>( <i>r</i> =-0.0307, <i>p</i> <0.01)                    | NEG **<br>( <i>r</i> =-0.0358, <i>p</i> <0.01) | NEG *<br>( <i>r</i> =-0.0207, <i>p</i> <0.05)  | (+)                                           | (-)             | <i>marg-signif</i><br>NEG<br>( <i>r</i> =-0.0077, <i>p</i> <0.10) | S-A04.d Regional Averages plot |                 |                 |
| Winter Trend<br><i>m02 + m03</i> |  | (-)                                                               | (-)                                            | (-)                                            | (+)             | (-)                                                               | (-)                                                               | NEG *<br>( <i>r</i> =-0.0273, <i>p</i> <0.05)  | (-)                                            | (+)                                           | (+)             | <i>marg-signif</i><br>NEG<br>( <i>r</i> =-0.0246, <i>p</i> <0.10) |                                |                 |                 |
| Spring Trend<br><i>m04 + m05</i> |  | NEG *<br>( <i>r</i> =-0.0486, <i>p</i> <0.05)                     | NEG *<br>( <i>r</i> =-0.0846, <i>p</i> <0.05)  | NEG *<br>( <i>r</i> =-0.0846, <i>p</i> <0.05)  | (-)             | (-)                                                               | <i>marg-signif</i><br>NEG<br>( <i>r</i> =-0.0446, <i>p</i> <0.10) | NEG *<br>( <i>r</i> =-0.0311, <i>p</i> <0.05)  | (-)                                            | (+)                                           | (-)             | (-)                                                               |                                |                 |                 |
| Summer Trend<br><i>m06 + m07</i> |  | NEG *<br>( <i>r</i> =-0.0274, <i>p</i> <0.05)                     | NEG *<br>( <i>r</i> =-0.0421, <i>p</i> <0.05)  | NEG *<br>( <i>r</i> =-0.0421, <i>p</i> <0.05)  | (-)             | <i>marg-signif</i><br>NEG<br>( <i>r</i> =-0.0127, <i>p</i> <0.10) | NEG **<br>( <i>r</i> =-0.0443, <i>p</i> <0.01)                    | NEG **<br>( <i>r</i> =-0.0397, <i>p</i> <0.01) | NEG **<br>( <i>r</i> =-0.0335, <i>p</i> <0.01) | NEG *<br>( <i>r</i> =-0.0167, <i>p</i> <0.05) | (-)             | NEG *<br>( <i>r</i> =-0.0167, <i>p</i> <0.05)                     |                                |                 |                 |
| Autumn Trend<br><i>m10 + m11</i> |  | (+)                                                               | (-)                                            | (-)                                            | (-)             | (-)                                                               | (-)                                                               | NEG **<br>( <i>r</i> =-0.0620, <i>p</i> <0.01) | (-)                                            | (+)                                           | (-)             | (+)                                                               |                                |                 |                 |
|                                  |  |                                                                   |                                                |                                                |                 |                                                                   |                                                                   |                                                |                                                |                                               |                 |                                                                   |                                |                 |                 |

### S-A04.c *Averages-n-Trends plots*

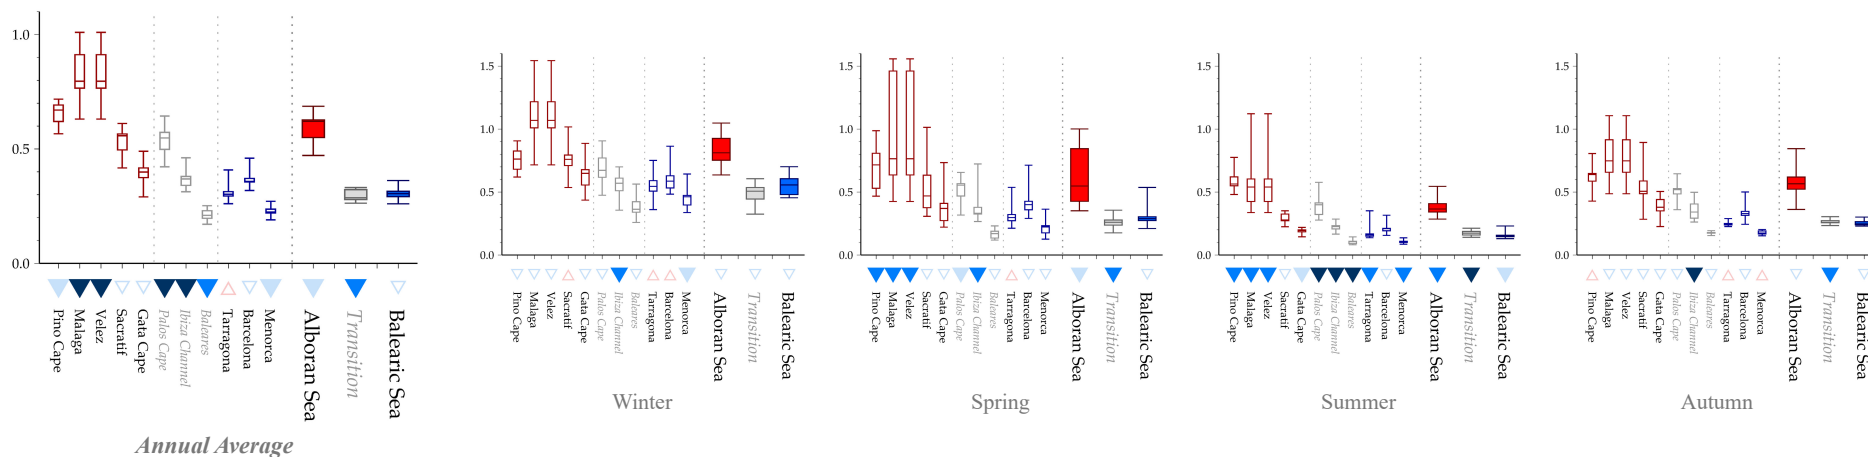

Table S-A05    Ashfree Dry Mass (mg m<sup>-3</sup>) trends in the western Mediterranean Sea (2007-2017)

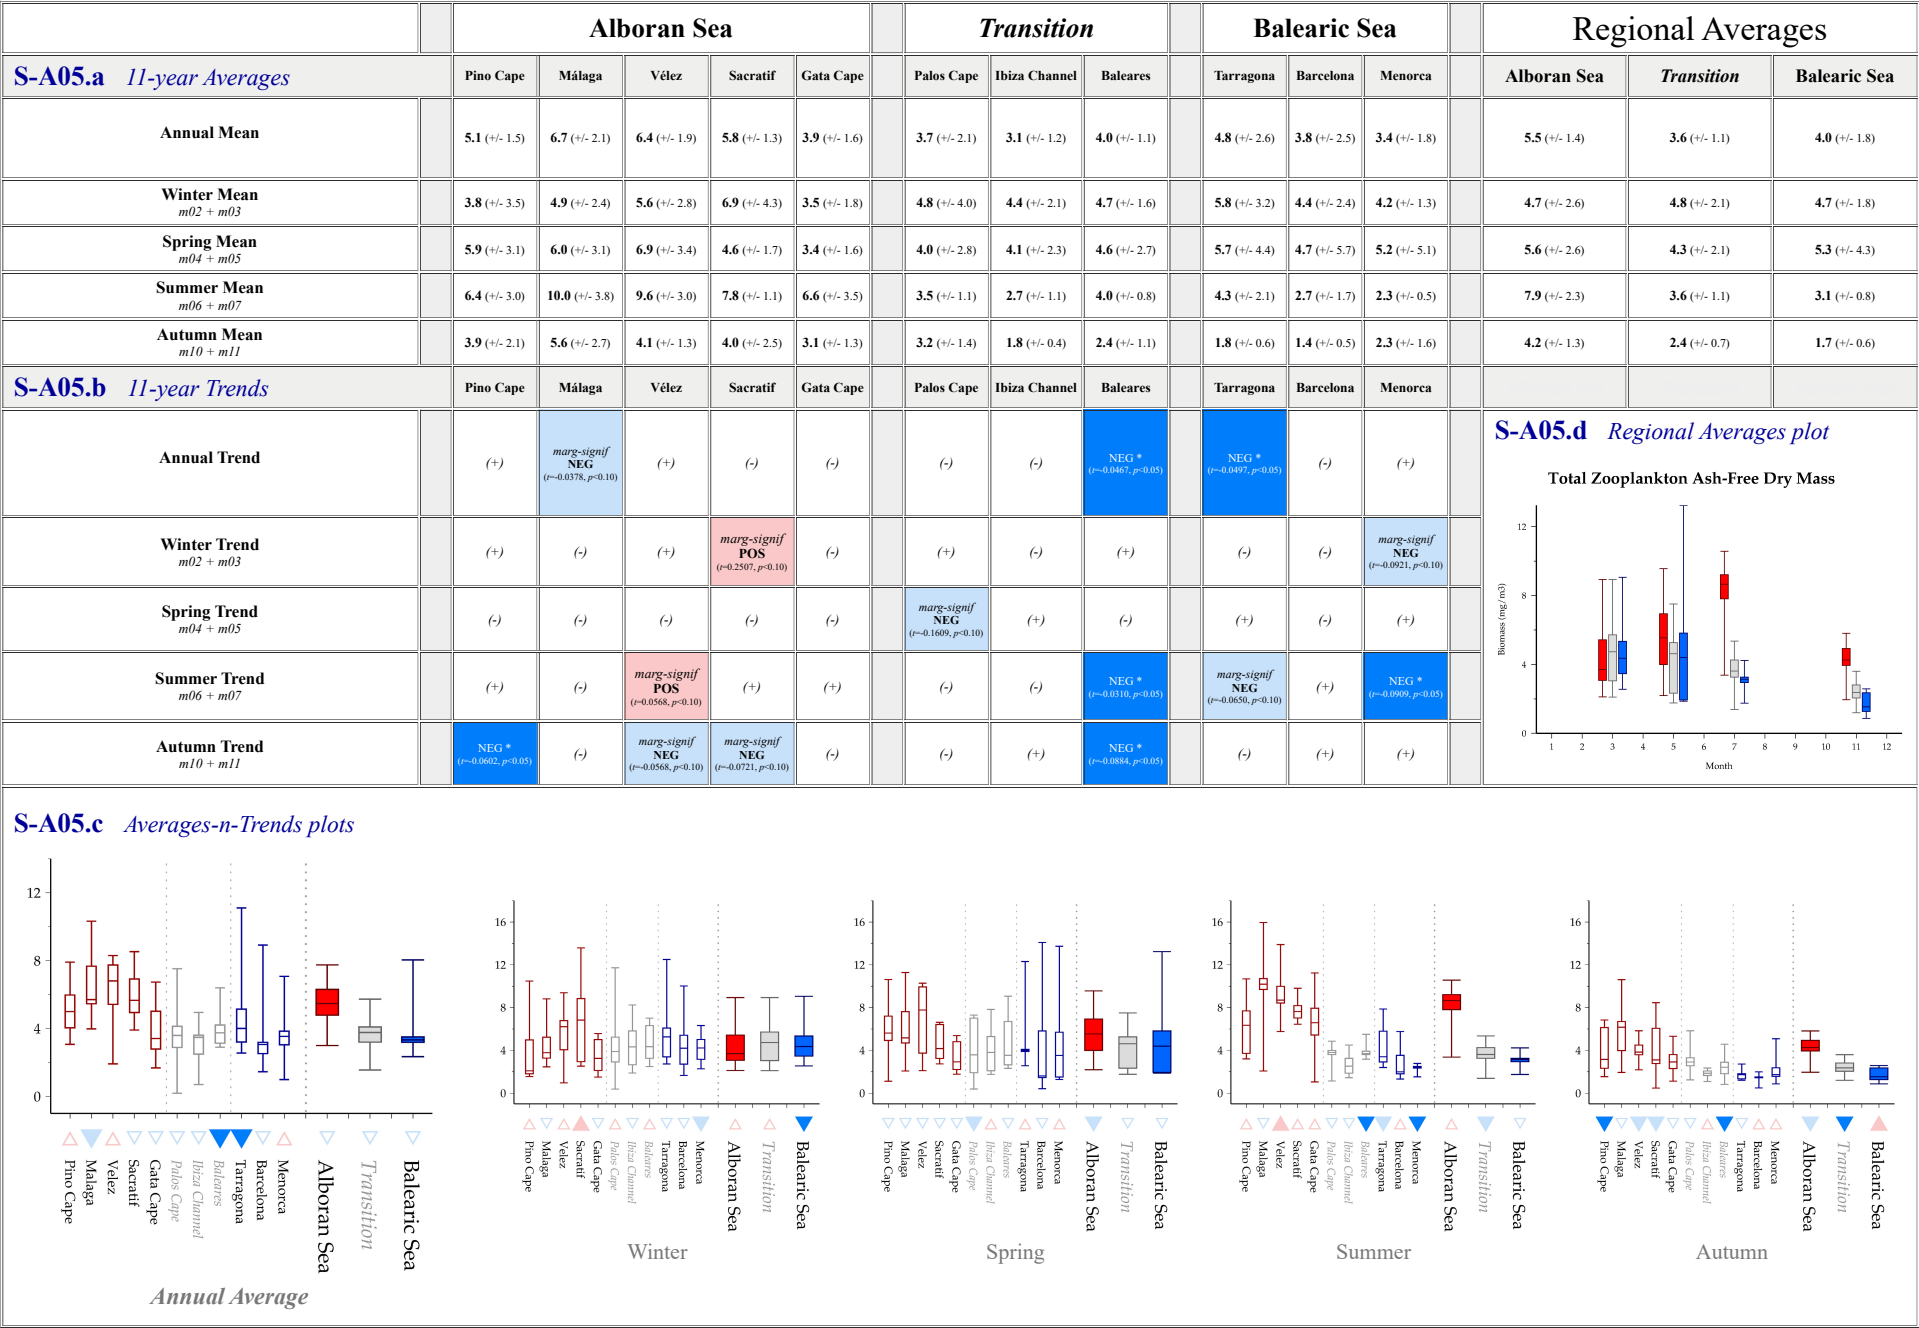

Table S-A06 Dry Mass (mg m<sup>-3</sup>) trends in the western Mediterranean Sea (2007-2017)

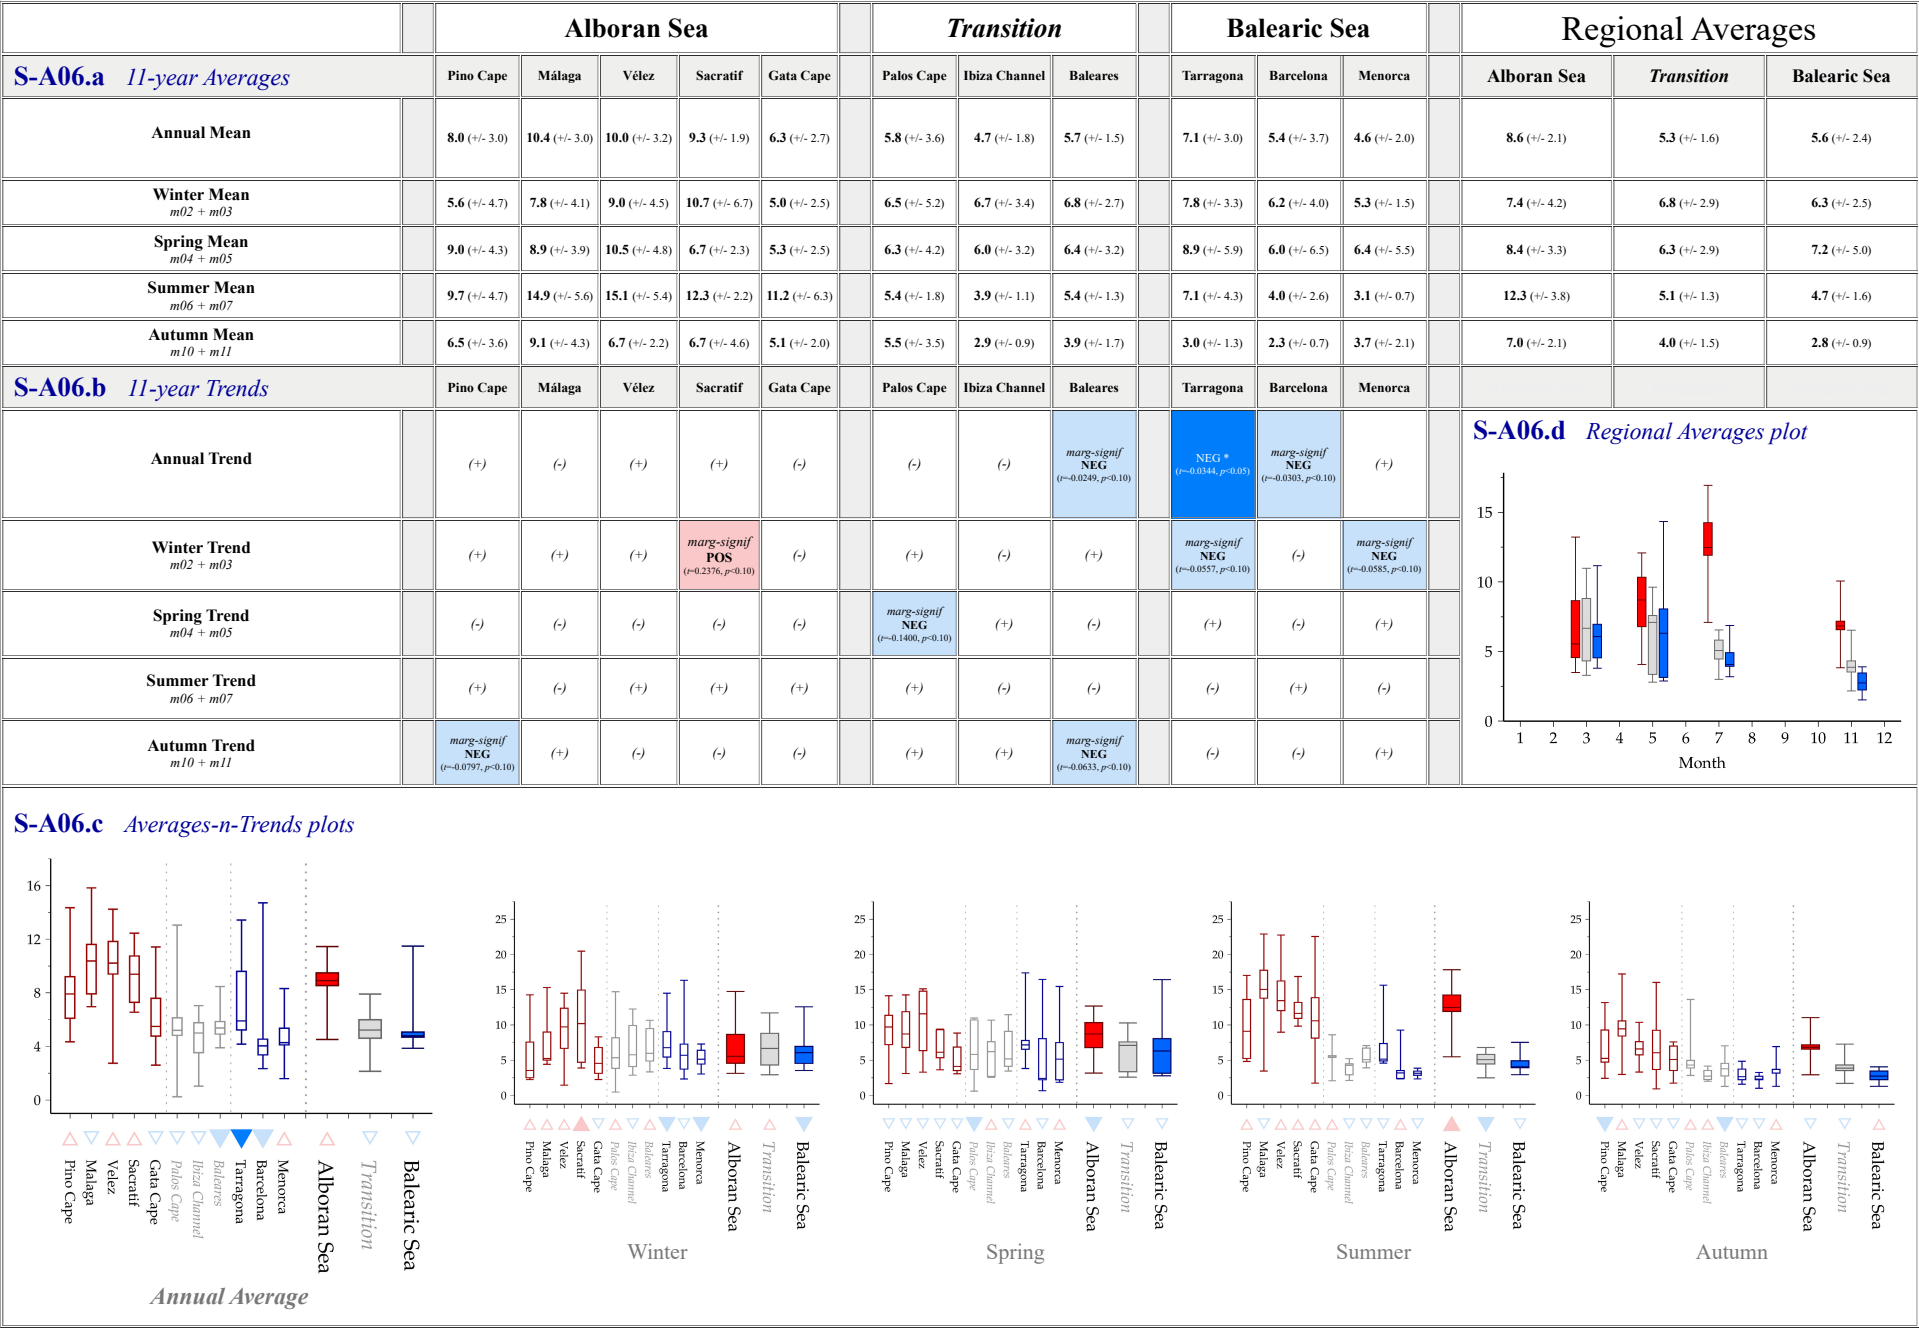

**Table S-A07**    **Ratio of Ashfree Dry Mass to Dry Mass** trends in the western Mediterranean Sea (2007-2017)

**S-A07.a 11-year Averages**

|                                        | Pino Cape     | Málaga        | Vélez         | Sacratif      | Gata Cape     | Palos Cape    | Ibiza Channel | Baleares      | Tarragona     | Barcelona     | Menorca       | Alboran Sea   | Transition    | Balearic Sea  |
|----------------------------------------|---------------|---------------|---------------|---------------|---------------|---------------|---------------|---------------|---------------|---------------|---------------|---------------|---------------|---------------|
| <b>Annual Mean</b>                     | 0.6 (+/- 0.1) | 0.6 (+/- 0.1) | 0.6 (+/- 0.1) | 0.6 (+/- 0.1) | 0.6 (+/- 0)   | 0.7 (+/- 0.1) | 0.7 (+/- 0)   | 0.7 (+/- 0.1) | 0.7 (+/- 0.1) | 0.7 (+/- 0.1) | 0.7 (+/- 0.1) | 0.6 (+/- 0)   | 0.7 (+/- 0)   | 0.7 (+/- 0.1) |
| <b>Winter Mean</b><br><i>m02 + m03</i> | 0.7 (+/- 0.1) | 0.6 (+/- 0.1) | 0.6 (+/- 0.1) | 0.7 (+/- 0.1) | 0.7 (+/- 0)   | 0.7 (+/- 0.1) | 0.7 (+/- 0.1) | 0.7 (+/- 0.1) | 0.7 (+/- 0.1) | 0.7 (+/- 0.1) | 0.8 (+/- 0.1) | 0.6 (+/- 0.1) | 0.7 (+/- 0)   | 0.7 (+/- 0.1) |
| <b>Spring Mean</b><br><i>m04 + m05</i> | 0.6 (+/- 0.1) | 0.7 (+/- 0.1) | 0.7 (+/- 0.1) | 0.7 (+/- 0.1) | 0.6 (+/- 0.1) | 0.6 (+/- 0.1) | 0.7 (+/- 0.1) | 0.7 (+/- 0.1) | 0.6 (+/- 0.1) | 0.7 (+/- 0.1) | 0.7 (+/- 0.1) | 0.7 (+/- 0.1) | 0.7 (+/- 0)   | 0.7 (+/- 0.1) |
| <b>Summer Mean</b><br><i>m06 + m07</i> | 0.7 (+/- 0.1) | 0.7 (+/- 0.1) | 0.6 (+/- 0)   | 0.6 (+/- 0.1) | 0.6 (+/- 0.1) | 0.6 (+/- 0.1) | 0.7 (+/- 0.2) | 0.7 (+/- 0.1) | 0.6 (+/- 0.1) | 0.7 (+/- 0.2) | 0.7 (+/- 0.2) | 0.6 (+/- 0)   | 0.7 (+/- 0.1) | 0.7 (+/- 0.2) |
| <b>Autumn Mean</b><br><i>m10 + m11</i> | 0.6 (+/- 0.1) | 0.6 (+/- 0.1) | 0.6 (+/- 0.1) | 0.6 (+/- 0.1) | 0.6 (+/- 0.1) | 0.6 (+/- 0.1) | 0.6 (+/- 0.1) | 0.6 (+/- 0.1) | 0.6 (+/- 0.1) | 0.6 (+/- 0.1) | 0.6 (+/- 0.1) | 0.6 (+/- 0.1) | 0.6 (+/- 0.1) | 0.6 (+/- 0.1) |

**S-A07.b 11-year Trends**

|                                         | Pino Cape                                        | Málaga                              | Vélez                               | Sacratif                            | Gata Cape                           | Palos Cape                                       | Ibiza Channel                                    | Baleares                                         | Tarragona                                        | Barcelona                           | Menorca | Alboran Sea | Transition | Balearic Sea |
|-----------------------------------------|--------------------------------------------------|-------------------------------------|-------------------------------------|-------------------------------------|-------------------------------------|--------------------------------------------------|--------------------------------------------------|--------------------------------------------------|--------------------------------------------------|-------------------------------------|---------|-------------|------------|--------------|
| <b>Annual Trend</b>                     | NEG *<br>( $r=-0.0120$ , $p<0.05$ )              | NEG *<br>( $r=-0.0154$ , $p<0.05$ ) | (-)                                 | (-)                                 | (-)                                 | NEG **<br>( $r=-0.0240$ , $p<0.01$ )             | NEG *<br>( $r=-0.0145$ , $p<0.05$ )              | NEG *<br>( $r=-0.0171$ , $p<0.05$ )              | (-)                                              | (-)                                 | (-)     |             |            |              |
| <b>Winter Trend</b><br><i>m02 + m03</i> | (+)                                              | NEG *<br>( $r=-0.0290$ , $p<0.05$ ) | (+)                                 | (-)                                 | (+)                                 | marg-signif<br>NEG<br>( $r=-0.0232$ , $p<0.10$ ) | (-)                                              | (-)                                              | (+)                                              | (-)                                 | (-)     |             |            |              |
| <b>Spring Trend</b><br><i>m04 + m05</i> | NEG *<br>( $r=-0.0359$ , $p<0.05$ )              | NEG *<br>( $r=-0.0313$ , $p<0.05$ ) | NEG *<br>( $r=-0.0235$ , $p<0.05$ ) | NEG *<br>( $r=-0.0290$ , $p<0.05$ ) | NEG *<br>( $r=-0.0188$ , $p<0.05$ ) | NEG *<br>( $r=-0.0273$ , $p<0.05$ )              | (+)                                              | marg-signif<br>NEG<br>( $r=-0.0127$ , $p<0.10$ ) | (-)                                              | (-)                                 | (-)     |             |            |              |
| <b>Summer Trend</b><br><i>m06 + m07</i> | marg-signif<br>NEG<br>( $r=-0.0146$ , $p<0.10$ ) | (-)                                 | NEG *<br>( $r=-0.0061$ , $p<0.05$ ) | NEG *<br>( $r=-0.0140$ , $p<0.05$ ) | (-)                                 | NEG **<br>( $r=-0.0239$ , $p<0.01$ )             | (-)                                              | (-)                                              | marg-signif<br>NEG<br>( $r=-0.0344$ , $p<0.10$ ) | NEG *<br>( $r=-0.0283$ , $p<0.05$ ) | (-)     |             |            |              |
| <b>Autumn Trend</b><br><i>m10 + m11</i> | marg-signif<br>NEG<br>( $r=-0.0209$ , $p<0.10$ ) | NEG *<br>( $r=-0.0202$ , $p<0.05$ ) | (-)                                 | (+)                                 | (+)                                 | marg-signif<br>NEG<br>( $r=-0.0365$ , $p<0.10$ ) | marg-signif<br>NEG<br>( $r=-0.0191$ , $p<0.10$ ) | NEG *<br>( $r=-0.0146$ , $p<0.05$ )              | (+)                                              | (+)                                 | (+)     |             |            |              |

**S-A07.d Regional Averages plot**

**S-A07.c Averages-n-Trends plots**

**Table S-A08** Total Zooplankton (ind. m<sup>-3</sup>) trends in the western Mediterranean Sea (2007-2017)

|                                  |  | Alboran Sea                          |                                                  |                                      |                                      |                    | Transition                           |                                                  |                                      | Balearic Sea       |                    |                    | Regional Averages                                                                   |                   |                    |
|----------------------------------|--|--------------------------------------|--------------------------------------------------|--------------------------------------|--------------------------------------|--------------------|--------------------------------------|--------------------------------------------------|--------------------------------------|--------------------|--------------------|--------------------|-------------------------------------------------------------------------------------|-------------------|--------------------|
| S-A08.a 11-year Averages         |  | Pino Cape                            | Málaga                                           | Vélez                                | Sacratif                             | Gata Cape          | Palos Cape                           | Ibiza Channel                                    | Baleares                             | Tarragona          | Barcelona          | Menorca            | Alboran Sea                                                                         | Transition        | Balearic Sea       |
| Annual Mean                      |  | 936.7 (+/- 364.7)                    | 1420.1 (+/- 804.2)                               | 1504.0 (+/- 601.6)                   | 1181.5 (+/- 401.5)                   | 843.4 (+/- 253.0)  | 645.8 (+/- 349.5)                    | 599.9 (+/- 198.0)                                | 785.0 (+/- 286.9)                    | 881.7 (+/- 313.0)  | 783.9 (+/- 469.1)  | 747.0 (+/- 729.5)  | 1175.3 (+/- 377.2)                                                                  | 704.0 (+/- 212.5) | 806.5 (+/- 350.2)  |
| Winter Mean<br><i>m02 + m03</i>  |  | 769.3 (+/- 592.5)                    | 777.9 (+/- 436.3)                                | 977.0 (+/- 804.4)                    | 957.9 (+/- 653.4)                    | 719.3 (+/- 185.0)  | 828.1 (+/- 545.7)                    | 753.2 (+/- 232.8)                                | 1008.1 (+/- 456.0)                   | 1155.6 (+/- 483.9) | 1050.7 (+/- 606.7) | 1109.0 (+/- 841.1) | 788.4 (+/- 372.0)                                                                   | 919.7 (+/- 307.9) | 1101.9 (+/- 448.8) |
| Spring Mean<br><i>m04 + m05</i>  |  | 840.6 (+/- 327.0)                    | 1071.2 (+/- 517.5)                               | 1122.3 (+/- 813.4)                   | 967.3 (+/- 431.8)                    | 665.6 (+/- 254.2)  | 683.4 (+/- 532.3)                    | 584.4 (+/- 370.5)                                | 901.9 (+/- 408.9)                    | 627.8 (+/- 344.0)  | 685.1 (+/- 784.4)  | 741.5 (+/- 657.4)  | 990.1 (+/- 434.3)                                                                   | 765.5 (+/- 336.4) | 731.6 (+/- 527.9)  |
| Summer Mean<br><i>m06 + m07</i>  |  | 1577.5 (+/- 920.6)                   | 2412.6 (+/- 1882.5)                              | 2964.2 (+/- 1420.0)                  | 2101.4 (+/- 613.0)                   | 1351.5 (+/- 727.6) | 654.1 (+/- 454.7)                    | 583.7 (+/- 277.3)                                | 563.4 (+/- 214.0)                    | 1524.7 (+/- 959.0) | 913.0 (+/- 698.2)  | 274.9 (+/- 135.6)  | 2085.4 (+/- 904.0)                                                                  | 591.6 (+/- 265.6) | 896.7 (+/- 344.5)  |
| Autumn Mean<br><i>m10 + m11</i>  |  | 809.4 (+/- 674.9)                    | 1465.9 (+/- 1161.6)                              | 915.4 (+/- 611.8)                    | 682.8 (+/- 504.8)                    | 574.2 (+/- 180.6)  | 545.4 (+/- 421.7)                    | 471.6 (+/- 252.4)                                | 442.2 (+/- 371.6)                    | 382.5 (+/- 146.3)  | 254.0 (+/- 110.0)  | 283.7 (+/- 139.5)  | 886.8 (+/- 533.1)                                                                   | 467.6 (+/- 245.8) | 287.4 (+/- 76.0)   |
| S-A08.b 11-year Trends           |  | Pino Cape                            | Málaga                                           | Vélez                                | Sacratif                             | Gata Cape          | Palos Cape                           | Ibiza Channel                                    | Baleares                             | Tarragona          | Barcelona          | Menorca            |                                                                                     |                   |                    |
| Annual Trend                     |  | (-)                                  | NEG *<br><i>(r=-0.0565, p=0.005)</i>             | (-)                                  | NEG **<br><i>(r=-0.0813, p=0.01)</i> | (-)                | (-)                                  | NEG *<br><i>(r=-0.0537, p=0.005)</i>             | NEG *<br><i>(r=-0.0552, p=0.005)</i> | (+)                | (-)                | (-)                | S-A08.d Regional Averages plot                                                      |                   |                    |
| Winter Trend<br><i>m02 + m03</i> |  | (+)                                  | (-)                                              | (-)                                  | (-)                                  | (+)                | (+)                                  | (-)                                              | (+)                                  | (+)                | (-)                | (+)                |  |                   |                    |
| Spring Trend<br><i>m04 + m05</i> |  | (+)                                  | marg-signif<br>NEG<br><i>(r=-0.1038, p=0.10)</i> | (-)                                  | NEG *<br><i>(r=-0.0863, p=0.005)</i> | (-)                | (-)                                  | (-)                                              | NEG *<br><i>(r=-0.1215, p=0.005)</i> | (-)                | (-)                | (-)                |                                                                                     |                   |                    |
| Summer Trend<br><i>m06 + m07</i> |  | (+)                                  | (-)                                              | (-)                                  | NEG *<br><i>(r=-0.0361, p=0.005)</i> | (-)                | NEG *<br><i>(r=-0.0931, p=0.005)</i> | marg-signif<br>NEG<br><i>(r=-0.0772, p=0.10)</i> | (-)                                  | (+)                | (+)                | (-)                |                                                                                     |                   |                    |
| Autumn Trend<br><i>m10 + m11</i> |  | NEG **<br><i>(r=-0.1101, p=0.01)</i> | (-)                                              | NEG *<br><i>(r=-0.1346, p=0.005)</i> | (-)                                  | (-)                | (-)                                  | NEG *<br><i>(r=-0.0593, p=0.005)</i>             | NEG **<br><i>(r=-0.1054, p=0.01)</i> | (-)                | (+)                | (+)                |                                                                                     |                   |                    |

### S-A08.c Averages-n-Trends plots

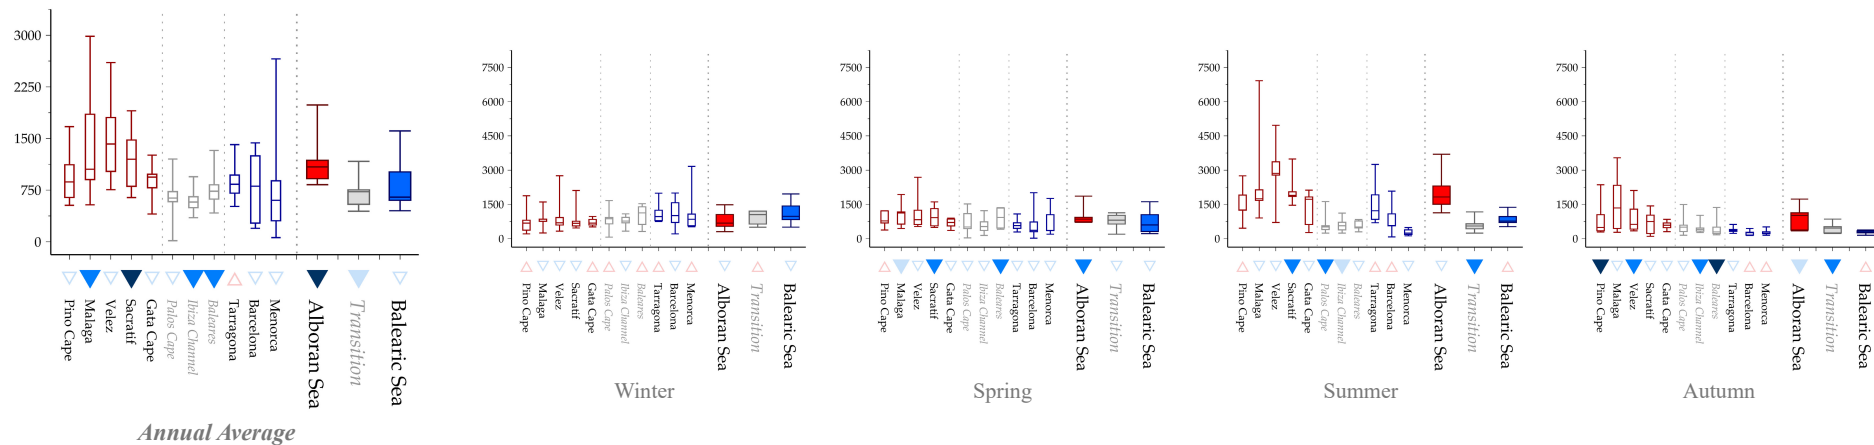

**Table S-A09** Ashfree Dry Mass per Individual (ug ind<sup>-1</sup>) trends in the western Mediterranean Sea (2007-2017)

|                                  |  | Alboran Sea   |               |                                                           |                                              |               | Transition                                                |                                                           |               | Balearic Sea                                              |                                               |               | Regional Averages                                                                   |               |               |
|----------------------------------|--|---------------|---------------|-----------------------------------------------------------|----------------------------------------------|---------------|-----------------------------------------------------------|-----------------------------------------------------------|---------------|-----------------------------------------------------------|-----------------------------------------------|---------------|-------------------------------------------------------------------------------------|---------------|---------------|
| S-A09.a 11-year Averages         |  | Pino Cape     | Málaga        | Vélez                                                     | Sacratif                                     | Gata Cape     | Palos Cape                                                | Ibiza Channel                                             | Baleares      | Tarragona                                                 | Barcelona                                     | Menorca       | Alboran Sea                                                                         | Transition    | Balearic Sea  |
| Annual Mean                      |  | 6.6 (+/- 4.8) | 7.2 (+/- 5.9) | 5.7 (+/- 2.8)                                             | 6.0 (+/- 3.5)                                | 4.5 (+/- 2.2) | 6.9 (+/- 2.3)                                             | 5.9 (+/- 2.1)                                             | 6.0 (+/- 1.7) | 6.1 (+/- 2.5)                                             | 6.0 (+/- 2.5)                                 | 7.5 (+/- 1.9) | 5.8 (+/- 2.3)                                                                       | 6.2 (+/- 1.6) | 6.2 (+/- 1.1) |
| Winter Mean<br><i>m02 + m03</i>  |  | 5.5 (+/- 2.6) | 6.2 (+/- 3.0) | 5.6 (+/- 3.3)                                             | 6.7 (+/- 4.4)                                | 5.1 (+/- 3.4) | 4.8 (+/- 2.0)                                             | 5.1 (+/- 2.3)                                             | 4.6 (+/- 1.5) | 5.4 (+/- 3.2)                                             | 4.7 (+/- 1.9)                                 | 4.0 (+/- 1.9) | 5.8 (+/- 3.1)                                                                       | 4.9 (+/- 1.7) | 4.6 (+/- 1.4) |
| Spring Mean<br><i>m04 + m05</i>  |  | 7.5 (+/- 4.2) | 6.2 (+/- 2.9) | 7.3 (+/- 4.4)                                             | 5.1 (+/- 1.4)                                | 4.4 (+/- 0.9) | 8.2 (+/- 4.5)                                             | 8.2 (+/- 3.8)                                             | 5.4 (+/- 2.0) | 8.7 (+/- 2.2)                                             | 9.9 (+/- 8.7)                                 | 6.9 (+/- 2.5) | 6.4 (+/- 2.8)                                                                       | 7.3 (+/- 3.0) | 8.1 (+/- 3.1) |
| Summer Mean<br><i>m06 + m07</i>  |  | 4.8 (+/- 2.5) | 4.7 (+/- 2.1) | 4.3 (+/- 3.2)                                             | 3.5 (+/- 0.7)                                | 5.0 (+/- 1.9) | 6.2 (+/- 2.5)                                             | 5.3 (+/- 1.5)                                             | 7.9 (+/- 3.0) | 3.9 (+/- 2.6)                                             | 3.2 (+/- 0.6)                                 | (+/- )        | 4.4 (+/- 1.5)                                                                       | 6.7 (+/- 1.9) | 5.4 (+/- 1.9) |
| Autumn Mean<br><i>m10 + m11</i>  |  | 6.6 (+/- 5.3) | 7.3 (+/- 7.1) | 5.8 (+/- 3.2)                                             | 9.1 (+/- 10.2)                               | 6.0 (+/- 3.0) | 7.6 (+/- 3.5)                                             | 4.5 (+/- 1.9)                                             | 6.7 (+/- 3.0) | 4.9 (+/- 1.8)                                             | 6.2 (+/- 3.5)                                 | 7.7 (+/- 1.5) | 7.1 (+/- 3.7)                                                                       | 6.5 (+/- 2.4) | 6.3 (+/- 2.1) |
| S-A09.b 11-year Trends           |  | Pino Cape     | Málaga        | Vélez                                                     | Sacratif                                     | Gata Cape     | Palos Cape                                                | Ibiza Channel                                             | Baleares      | Tarragona                                                 | Barcelona                                     | Menorca       |                                                                                     |               |               |
| Annual Trend                     |  | (+)           | (+)           | (+)                                                       | (+)                                          | (-)           | (+)                                                       | marg-signif<br>POS<br>( <i>r</i> =0.0506, <i>p</i> <0.10) | (+)           | marg-signif<br>NEG<br>( <i>r</i> =0.0587, <i>p</i> <0.10) | (+)                                           | (+)           | S-A09.d Regional Averages plot                                                      |               |               |
| Winter Trend<br><i>m02 + m03</i> |  | (+)           | (+)           | (+)                                                       | (+)                                          | (+)           | marg-signif<br>NEG<br>( <i>r</i> =0.0357, <i>p</i> <0.10) | (+)                                                       | (-)           | marg-signif<br>NEG<br>( <i>r</i> =0.0835, <i>p</i> <0.10) | (+)                                           | (-)           | AFDW-per-Individual                                                                 |               |               |
| Spring Trend<br><i>m04 + m05</i> |  | (-)           | (+)           | (+)                                                       | POS *<br>( <i>r</i> =0.0669, <i>p</i> <0.05) | (-)           | (-)                                                       | (+)                                                       | (+)           | (-)                                                       | (+)                                           | (+)           | 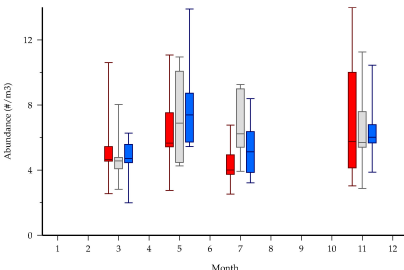 |               |               |
| Summer Trend<br><i>m06 + m07</i> |  | (-)           | (-)           | (+)                                                       | (+)                                          | (+)           | (+)                                                       | (+)                                                       | (+)           | NEG *<br>( <i>r</i> =-0.1902, <i>p</i> <0.05)             | NEG *<br>( <i>r</i> =-0.0299, <i>p</i> <0.05) | (+)           |                                                                                     |               |               |
| Autumn Trend<br><i>m10 + m11</i> |  | (+)           | (+)           | marg-signif<br>POS<br>( <i>r</i> =0.0763, <i>p</i> <0.10) | (+)                                          | (-)           | (-)                                                       | (+)                                                       | (+)           | (-)                                                       | (+)                                           | (+)           |                                                                                     |               |               |

### S-A09.c *Averages-n-Trends plots*

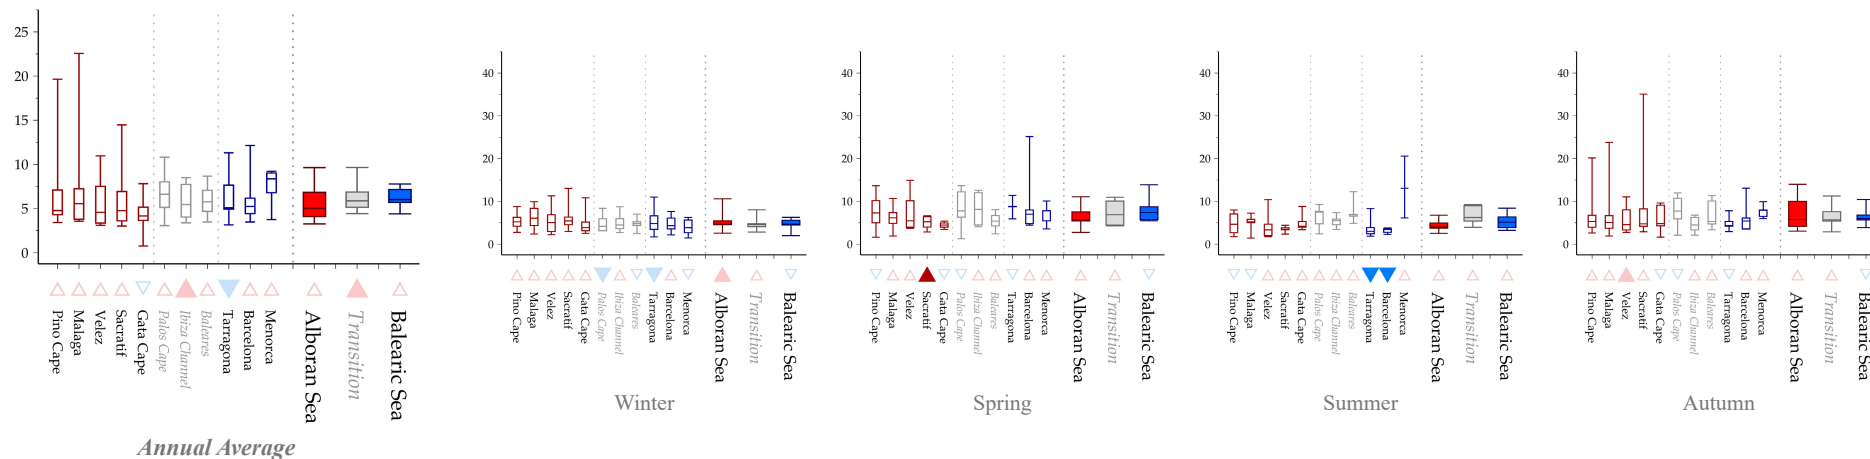

Table S-A10 Dry Mass per Individual (ug ind<sup>-1</sup>) trends in the western Mediterranean Sea (2007-2017)

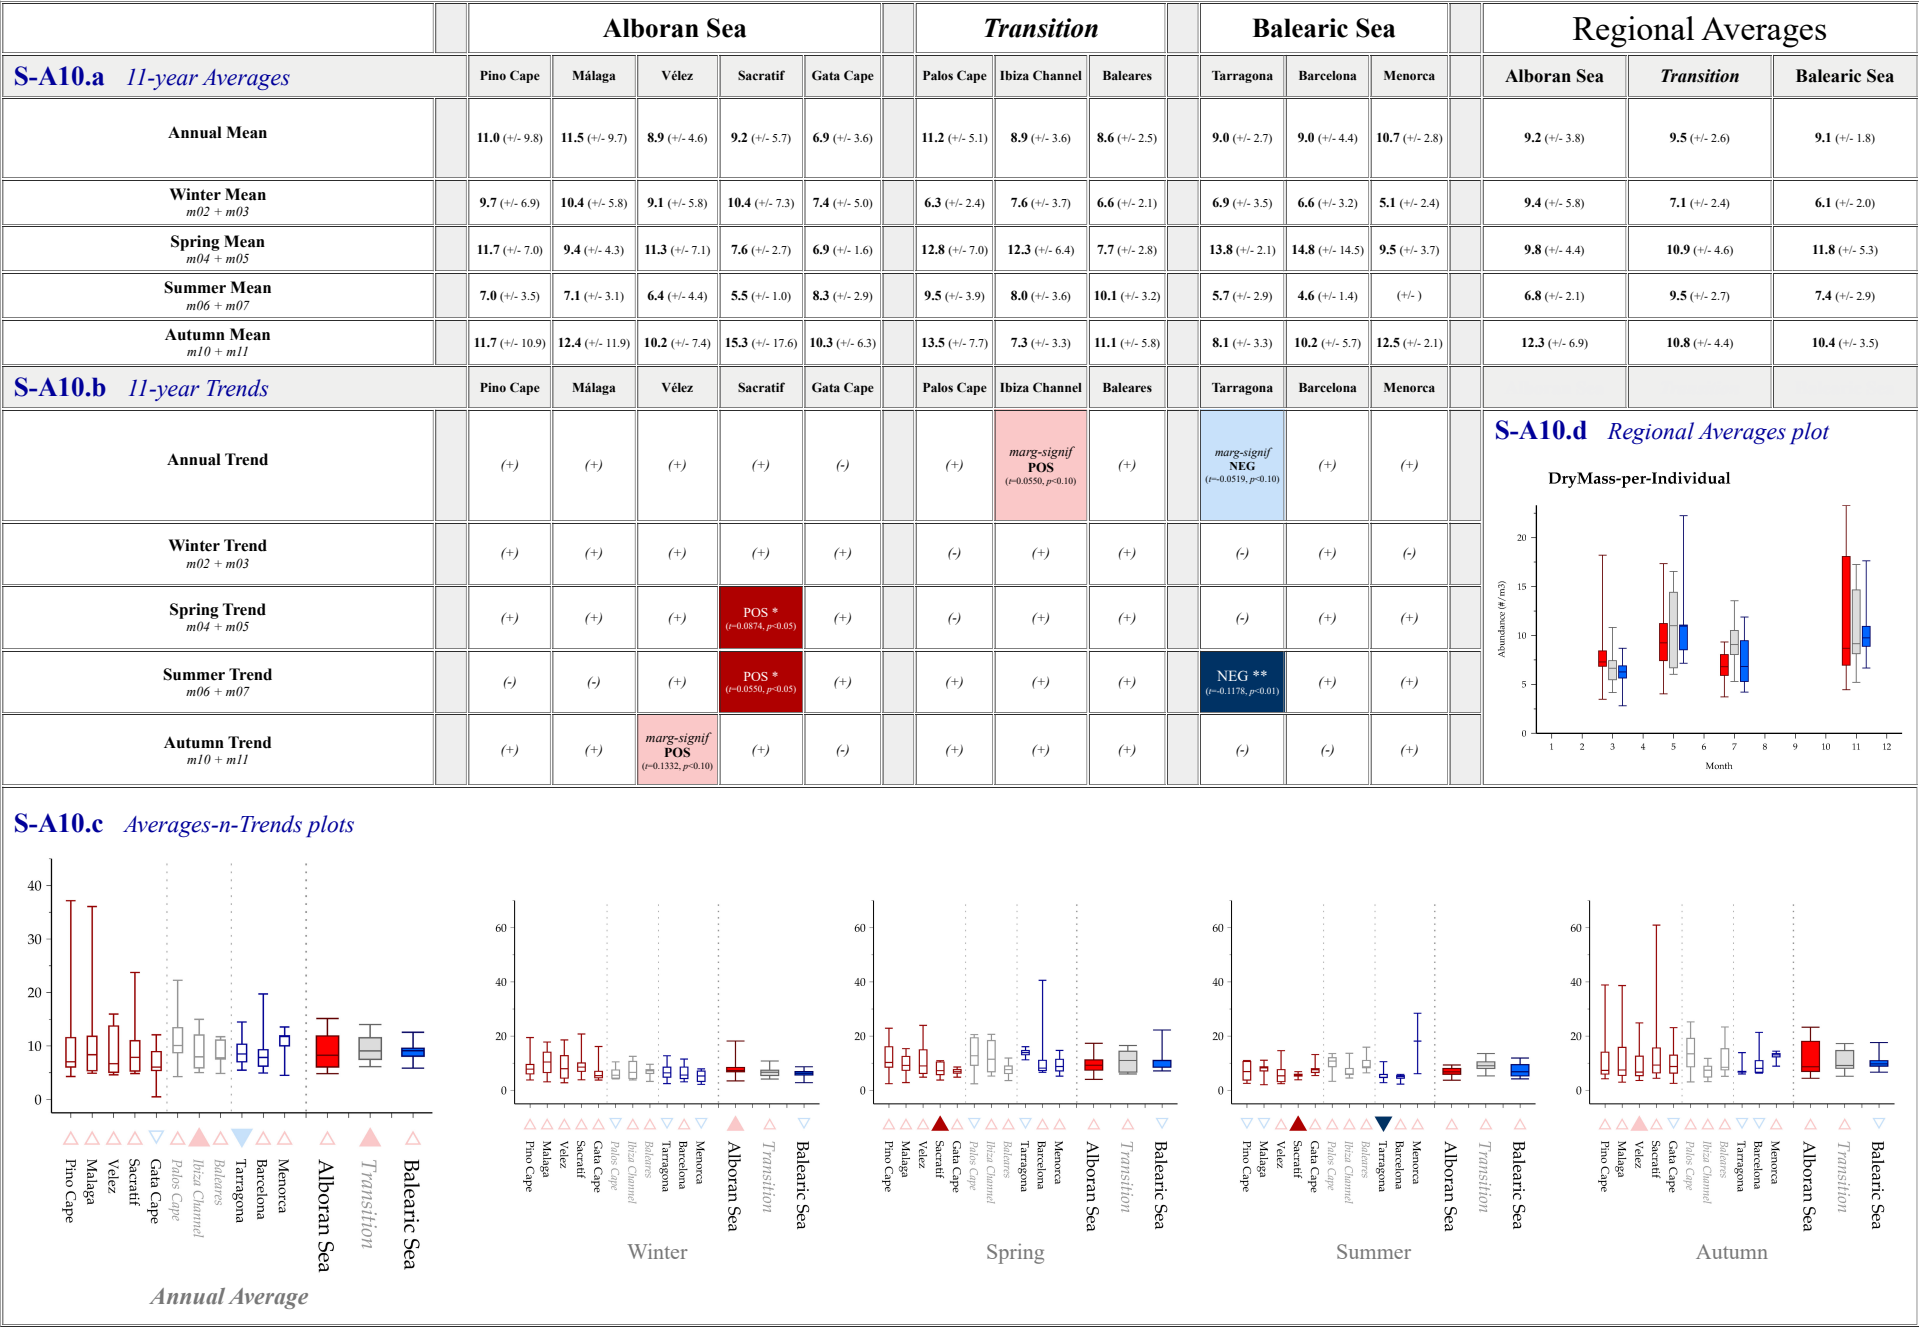



**Table S-A11** Total Copepods (ind. m<sup>-3</sup>) trends in the western Mediterranean Sea (2007-2017)

|                                  |     | Alboran Sea                                   |                                                                   |                                                                   |                                                                   |                   | Transition |                   |                                                                   | Balearic Sea                                                      |  |                                               | Regional Averages |                    |  |                                                                                                                                                                                                                                                                                                                                                                                                                                                                                                                                                                                                                                                                                                                                                                                                                                                                                                                                                                                                                                                                                                                                                                                                         |                   |                   |       |     |    |        |    |     |   |     |     |     |     |     |   |     |     |     |     |     |   |     |     |     |     |     |   |     |     |     |     |     |   |     |     |     |     |      |   |     |     |     |     |     |   |     |     |     |     |     |   |     |     |     |     |     |   |     |     |     |     |     |    |     |     |     |     |     |    |    |     |     |     |     |    |   |    |     |     |     |
|----------------------------------|-----|-----------------------------------------------|-------------------------------------------------------------------|-------------------------------------------------------------------|-------------------------------------------------------------------|-------------------|------------|-------------------|-------------------------------------------------------------------|-------------------------------------------------------------------|--|-----------------------------------------------|-------------------|--------------------|--|---------------------------------------------------------------------------------------------------------------------------------------------------------------------------------------------------------------------------------------------------------------------------------------------------------------------------------------------------------------------------------------------------------------------------------------------------------------------------------------------------------------------------------------------------------------------------------------------------------------------------------------------------------------------------------------------------------------------------------------------------------------------------------------------------------------------------------------------------------------------------------------------------------------------------------------------------------------------------------------------------------------------------------------------------------------------------------------------------------------------------------------------------------------------------------------------------------|-------------------|-------------------|-------|-----|----|--------|----|-----|---|-----|-----|-----|-----|-----|---|-----|-----|-----|-----|-----|---|-----|-----|-----|-----|-----|---|-----|-----|-----|-----|-----|---|-----|-----|-----|-----|------|---|-----|-----|-----|-----|-----|---|-----|-----|-----|-----|-----|---|-----|-----|-----|-----|-----|---|-----|-----|-----|-----|-----|----|-----|-----|-----|-----|-----|----|----|-----|-----|-----|-----|----|---|----|-----|-----|-----|
| S-A11.a 11-year Averages         |     | Pino Cape                                     | Málaga                                                            | Vélez                                                             | Sacratif                                                          | Gata Cape         |            | Palos Cape        | Ibiza Channel                                                     | Baleares                                                          |  | Tarragona                                     | Barcelona         | Menorca            |  | Alboran Sea                                                                                                                                                                                                                                                                                                                                                                                                                                                                                                                                                                                                                                                                                                                                                                                                                                                                                                                                                                                                                                                                                                                                                                                             | Transition        | Balearic Sea      |       |     |    |        |    |     |   |     |     |     |     |     |   |     |     |     |     |     |   |     |     |     |     |     |   |     |     |     |     |     |   |     |     |     |     |      |   |     |     |     |     |     |   |     |     |     |     |     |   |     |     |     |     |     |   |     |     |     |     |     |    |     |     |     |     |     |    |    |     |     |     |     |    |   |    |     |     |     |
| Annual Mean                      |     | 460.8 (+/- 151.9)                             | 522.4 (+/- 189.7)                                                 | 553.9 (+/- 196.7)                                                 | 413.4 (+/- 139.9)                                                 | 395.6 (+/- 96.9)  |            | 371.1 (+/- 198.5) | 347.5 (+/- 112.5)                                                 | 498.4 (+/- 244.5)                                                 |  | 370.2 (+/- 172.7)                             | 552.4 (+/- 344.7) | 619.0 (+/- 679.0)  |  | 473.7 (+/- 112.5)                                                                                                                                                                                                                                                                                                                                                                                                                                                                                                                                                                                                                                                                                                                                                                                                                                                                                                                                                                                                                                                                                                                                                                                       | 428.6 (+/- 131.7) | 540.6 (+/- 313.6) |       |     |    |        |    |     |   |     |     |     |     |     |   |     |     |     |     |     |   |     |     |     |     |     |   |     |     |     |     |     |   |     |     |     |     |      |   |     |     |     |     |     |   |     |     |     |     |     |   |     |     |     |     |     |   |     |     |     |     |     |    |     |     |     |     |     |    |    |     |     |     |     |    |   |    |     |     |     |
| Winter Mean<br><i>m02 + m03</i>  |     | 569.3 (+/- 471.3)                             | 473.1 (+/- 256.9)                                                 | 581.6 (+/- 591.1)                                                 | 489.6 (+/- 320.0)                                                 | 493.9 (+/- 160.2) |            | 665.6 (+/- 442.9) | 547.9 (+/- 199.7)                                                 | 759.7 (+/- 372.5)                                                 |  | 909.0 (+/- 436.2)                             | 891.5 (+/- 550.5) | 1005.2 (+/- 789.5) |  | 506.4 (+/- 231.2)                                                                                                                                                                                                                                                                                                                                                                                                                                                                                                                                                                                                                                                                                                                                                                                                                                                                                                                                                                                                                                                                                                                                                                                       | 695.4 (+/- 246.7) | 937.4 (+/- 402.2) |       |     |    |        |    |     |   |     |     |     |     |     |   |     |     |     |     |     |   |     |     |     |     |     |   |     |     |     |     |     |   |     |     |     |     |      |   |     |     |     |     |     |   |     |     |     |     |     |   |     |     |     |     |     |   |     |     |     |     |     |    |     |     |     |     |     |    |    |     |     |     |     |    |   |    |     |     |     |
| Spring Mean<br><i>m04 + m05</i>  |     | 494.8 (+/- 290.7)                             | 574.3 (+/- 270.1)                                                 | 616.7 (+/- 408.5)                                                 | 439.6 (+/- 151.6)                                                 | 457.1 (+/- 126.8) |            | 436.9 (+/- 452.6) | 337.3 (+/- 333.0)                                                 | 554.2 (+/- 318.3)                                                 |  | 370.1 (+/- 270.1)                             | 545.3 (+/- 689.8) | 605.6 (+/- 670.0)  |  | 533.0 (+/- 208.4)                                                                                                                                                                                                                                                                                                                                                                                                                                                                                                                                                                                                                                                                                                                                                                                                                                                                                                                                                                                                                                                                                                                                                                                       | 476.3 (+/- 261.8) | 568.1 (+/- 493.9) |       |     |    |        |    |     |   |     |     |     |     |     |   |     |     |     |     |     |   |     |     |     |     |     |   |     |     |     |     |     |   |     |     |     |     |      |   |     |     |     |     |     |   |     |     |     |     |     |   |     |     |     |     |     |   |     |     |     |     |     |    |     |     |     |     |     |    |    |     |     |     |     |    |   |    |     |     |     |
| Summer Mean<br><i>m06 + m07</i>  |     | 514.0 (+/- 373.9)                             | 537.1 (+/- 240.9)                                                 | 628.5 (+/- 267.4)                                                 | 447.4 (+/- 111.2)                                                 | 310.2 (+/- 130.9) |            | 195.2 (+/- 124.2) | 223.7 (+/- 132.2)                                                 | 261.3 (+/- 63.6)                                                  |  | 127.0 (+/- 68.4)                              | 394.7 (+/- 448.1) | 150.5 (+/- 76.2)   |  | 484.4 (+/- 138.0)                                                                                                                                                                                                                                                                                                                                                                                                                                                                                                                                                                                                                                                                                                                                                                                                                                                                                                                                                                                                                                                                                                                                                                                       | 227.6 (+/- 102.9) | 264.7 (+/- 245.0) |       |     |    |        |    |     |   |     |     |     |     |     |   |     |     |     |     |     |   |     |     |     |     |     |   |     |     |     |     |     |   |     |     |     |     |      |   |     |     |     |     |     |   |     |     |     |     |     |   |     |     |     |     |     |   |     |     |     |     |     |    |     |     |     |     |     |    |    |     |     |     |     |    |   |    |     |     |     |
| Autumn Mean<br><i>m10 + m11</i>  |     | 352.9 (+/- 211.6)                             | 523.3 (+/- 360.7)                                                 | 429.1 (+/- 278.9)                                                 | 256.5 (+/- 153.0)                                                 | 244.1 (+/- 109.5) |            | 258.3 (+/- 148.4) | 273.2 (+/- 130.5)                                                 | 230.4 (+/- 110.1)                                                 |  | 206.3 (+/- 61.8)                              | 166.5 (+/- 65.6)  | 179.5 (+/- 71.1)   |  | 360.2 (+/- 174.3)                                                                                                                                                                                                                                                                                                                                                                                                                                                                                                                                                                                                                                                                                                                                                                                                                                                                                                                                                                                                                                                                                                                                                                                       | 249.7 (+/- 92.7)  | 178.5 (+/- 37.1)  |       |     |    |        |    |     |   |     |     |     |     |     |   |     |     |     |     |     |   |     |     |     |     |     |   |     |     |     |     |     |   |     |     |     |     |      |   |     |     |     |     |     |   |     |     |     |     |     |   |     |     |     |     |     |   |     |     |     |     |     |    |     |     |     |     |     |    |    |     |     |     |     |    |   |    |     |     |     |
| S-A11.b 11-year Trends           |     | Pino Cape                                     | Málaga                                                            | Vélez                                                             | Sacratif                                                          | Gata Cape         |            | Palos Cape        | Ibiza Channel                                                     | Baleares                                                          |  | Tarragona                                     | Barcelona         | Menorca            |  |                                                                                                                                                                                                                                                                                                                                                                                                                                                                                                                                                                                                                                                                                                                                                                                                                                                                                                                                                                                                                                                                                                                                                                                                         |                   |                   |       |     |    |        |    |     |   |     |     |     |     |     |   |     |     |     |     |     |   |     |     |     |     |     |   |     |     |     |     |     |   |     |     |     |     |      |   |     |     |     |     |     |   |     |     |     |     |     |   |     |     |     |     |     |   |     |     |     |     |     |    |     |     |     |     |     |    |    |     |     |     |     |    |   |    |     |     |     |
| Annual Trend                     |     | (-)                                           | (-)                                                               | <i>marg-signif</i><br>NEG<br>( <i>r</i> =-0.0298, <i>p</i> =0.10) | <i>marg-signif</i><br>NEG<br>( <i>r</i> =-0.0433, <i>p</i> =0.10) | (-)               |            | (+)               | (-)                                                               | (-)                                                               |  | (-)                                           | (-)               | (-)                |  | <div>S-A11.d Regional Averages plot</div> <table><caption>Approximate data for S-A11.d Regional Averages plot</caption><tr><th>Month</th><th>Min</th><th>Q1</th><th>Median</th><th>Q3</th><th>Max</th></tr><tr><td>1</td><td>250</td><td>300</td><td>350</td><td>400</td><td>450</td></tr><tr><td>2</td><td>300</td><td>350</td><td>400</td><td>450</td><td>500</td></tr><tr><td>3</td><td>450</td><td>550</td><td>650</td><td>750</td><td>850</td></tr><tr><td>4</td><td>500</td><td>600</td><td>700</td><td>800</td><td>900</td></tr><tr><td>5</td><td>600</td><td>700</td><td>800</td><td>900</td><td>1000</td></tr><tr><td>6</td><td>350</td><td>400</td><td>450</td><td>500</td><td>550</td></tr><tr><td>7</td><td>250</td><td>300</td><td>350</td><td>400</td><td>450</td></tr><tr><td>8</td><td>200</td><td>250</td><td>300</td><td>350</td><td>400</td></tr><tr><td>9</td><td>150</td><td>200</td><td>250</td><td>300</td><td>350</td></tr><tr><td>10</td><td>100</td><td>150</td><td>200</td><td>250</td><td>300</td></tr><tr><td>11</td><td>50</td><td>100</td><td>150</td><td>200</td><td>250</td></tr><tr><td>12</td><td>0</td><td>50</td><td>100</td><td>150</td><td>200</td></tr></table> |                   |                   | Month | Min | Q1 | Median | Q3 | Max | 1 | 250 | 300 | 350 | 400 | 450 | 2 | 300 | 350 | 400 | 450 | 500 | 3 | 450 | 550 | 650 | 750 | 850 | 4 | 500 | 600 | 700 | 800 | 900 | 5 | 600 | 700 | 800 | 900 | 1000 | 6 | 350 | 400 | 450 | 500 | 550 | 7 | 250 | 300 | 350 | 400 | 450 | 8 | 200 | 250 | 300 | 350 | 400 | 9 | 150 | 200 | 250 | 300 | 350 | 10 | 100 | 150 | 200 | 250 | 300 | 11 | 50 | 100 | 150 | 200 | 250 | 12 | 0 | 50 | 100 | 150 | 200 |
| Month                            | Min | Q1                                            | Median                                                            | Q3                                                                | Max                                                               |                   |            |                   |                                                                   |                                                                   |  |                                               |                   |                    |  |                                                                                                                                                                                                                                                                                                                                                                                                                                                                                                                                                                                                                                                                                                                                                                                                                                                                                                                                                                                                                                                                                                                                                                                                         |                   |                   |       |     |    |        |    |     |   |     |     |     |     |     |   |     |     |     |     |     |   |     |     |     |     |     |   |     |     |     |     |     |   |     |     |     |     |      |   |     |     |     |     |     |   |     |     |     |     |     |   |     |     |     |     |     |   |     |     |     |     |     |    |     |     |     |     |     |    |    |     |     |     |     |    |   |    |     |     |     |
| 1                                | 250 | 300                                           | 350                                                               | 400                                                               | 450                                                               |                   |            |                   |                                                                   |                                                                   |  |                                               |                   |                    |  |                                                                                                                                                                                                                                                                                                                                                                                                                                                                                                                                                                                                                                                                                                                                                                                                                                                                                                                                                                                                                                                                                                                                                                                                         |                   |                   |       |     |    |        |    |     |   |     |     |     |     |     |   |     |     |     |     |     |   |     |     |     |     |     |   |     |     |     |     |     |   |     |     |     |     |      |   |     |     |     |     |     |   |     |     |     |     |     |   |     |     |     |     |     |   |     |     |     |     |     |    |     |     |     |     |     |    |    |     |     |     |     |    |   |    |     |     |     |
| 2                                | 300 | 350                                           | 400                                                               | 450                                                               | 500                                                               |                   |            |                   |                                                                   |                                                                   |  |                                               |                   |                    |  |                                                                                                                                                                                                                                                                                                                                                                                                                                                                                                                                                                                                                                                                                                                                                                                                                                                                                                                                                                                                                                                                                                                                                                                                         |                   |                   |       |     |    |        |    |     |   |     |     |     |     |     |   |     |     |     |     |     |   |     |     |     |     |     |   |     |     |     |     |     |   |     |     |     |     |      |   |     |     |     |     |     |   |     |     |     |     |     |   |     |     |     |     |     |   |     |     |     |     |     |    |     |     |     |     |     |    |    |     |     |     |     |    |   |    |     |     |     |
| 3                                | 450 | 550                                           | 650                                                               | 750                                                               | 850                                                               |                   |            |                   |                                                                   |                                                                   |  |                                               |                   |                    |  |                                                                                                                                                                                                                                                                                                                                                                                                                                                                                                                                                                                                                                                                                                                                                                                                                                                                                                                                                                                                                                                                                                                                                                                                         |                   |                   |       |     |    |        |    |     |   |     |     |     |     |     |   |     |     |     |     |     |   |     |     |     |     |     |   |     |     |     |     |     |   |     |     |     |     |      |   |     |     |     |     |     |   |     |     |     |     |     |   |     |     |     |     |     |   |     |     |     |     |     |    |     |     |     |     |     |    |    |     |     |     |     |    |   |    |     |     |     |
| 4                                | 500 | 600                                           | 700                                                               | 800                                                               | 900                                                               |                   |            |                   |                                                                   |                                                                   |  |                                               |                   |                    |  |                                                                                                                                                                                                                                                                                                                                                                                                                                                                                                                                                                                                                                                                                                                                                                                                                                                                                                                                                                                                                                                                                                                                                                                                         |                   |                   |       |     |    |        |    |     |   |     |     |     |     |     |   |     |     |     |     |     |   |     |     |     |     |     |   |     |     |     |     |     |   |     |     |     |     |      |   |     |     |     |     |     |   |     |     |     |     |     |   |     |     |     |     |     |   |     |     |     |     |     |    |     |     |     |     |     |    |    |     |     |     |     |    |   |    |     |     |     |
| 5                                | 600 | 700                                           | 800                                                               | 900                                                               | 1000                                                              |                   |            |                   |                                                                   |                                                                   |  |                                               |                   |                    |  |                                                                                                                                                                                                                                                                                                                                                                                                                                                                                                                                                                                                                                                                                                                                                                                                                                                                                                                                                                                                                                                                                                                                                                                                         |                   |                   |       |     |    |        |    |     |   |     |     |     |     |     |   |     |     |     |     |     |   |     |     |     |     |     |   |     |     |     |     |     |   |     |     |     |     |      |   |     |     |     |     |     |   |     |     |     |     |     |   |     |     |     |     |     |   |     |     |     |     |     |    |     |     |     |     |     |    |    |     |     |     |     |    |   |    |     |     |     |
| 6                                | 350 | 400                                           | 450                                                               | 500                                                               | 550                                                               |                   |            |                   |                                                                   |                                                                   |  |                                               |                   |                    |  |                                                                                                                                                                                                                                                                                                                                                                                                                                                                                                                                                                                                                                                                                                                                                                                                                                                                                                                                                                                                                                                                                                                                                                                                         |                   |                   |       |     |    |        |    |     |   |     |     |     |     |     |   |     |     |     |     |     |   |     |     |     |     |     |   |     |     |     |     |     |   |     |     |     |     |      |   |     |     |     |     |     |   |     |     |     |     |     |   |     |     |     |     |     |   |     |     |     |     |     |    |     |     |     |     |     |    |    |     |     |     |     |    |   |    |     |     |     |
| 7                                | 250 | 300                                           | 350                                                               | 400                                                               | 450                                                               |                   |            |                   |                                                                   |                                                                   |  |                                               |                   |                    |  |                                                                                                                                                                                                                                                                                                                                                                                                                                                                                                                                                                                                                                                                                                                                                                                                                                                                                                                                                                                                                                                                                                                                                                                                         |                   |                   |       |     |    |        |    |     |   |     |     |     |     |     |   |     |     |     |     |     |   |     |     |     |     |     |   |     |     |     |     |     |   |     |     |     |     |      |   |     |     |     |     |     |   |     |     |     |     |     |   |     |     |     |     |     |   |     |     |     |     |     |    |     |     |     |     |     |    |    |     |     |     |     |    |   |    |     |     |     |
| 8                                | 200 | 250                                           | 300                                                               | 350                                                               | 400                                                               |                   |            |                   |                                                                   |                                                                   |  |                                               |                   |                    |  |                                                                                                                                                                                                                                                                                                                                                                                                                                                                                                                                                                                                                                                                                                                                                                                                                                                                                                                                                                                                                                                                                                                                                                                                         |                   |                   |       |     |    |        |    |     |   |     |     |     |     |     |   |     |     |     |     |     |   |     |     |     |     |     |   |     |     |     |     |     |   |     |     |     |     |      |   |     |     |     |     |     |   |     |     |     |     |     |   |     |     |     |     |     |   |     |     |     |     |     |    |     |     |     |     |     |    |    |     |     |     |     |    |   |    |     |     |     |
| 9                                | 150 | 200                                           | 250                                                               | 300                                                               | 350                                                               |                   |            |                   |                                                                   |                                                                   |  |                                               |                   |                    |  |                                                                                                                                                                                                                                                                                                                                                                                                                                                                                                                                                                                                                                                                                                                                                                                                                                                                                                                                                                                                                                                                                                                                                                                                         |                   |                   |       |     |    |        |    |     |   |     |     |     |     |     |   |     |     |     |     |     |   |     |     |     |     |     |   |     |     |     |     |     |   |     |     |     |     |      |   |     |     |     |     |     |   |     |     |     |     |     |   |     |     |     |     |     |   |     |     |     |     |     |    |     |     |     |     |     |    |    |     |     |     |     |    |   |    |     |     |     |
| 10                               | 100 | 150                                           | 200                                                               | 250                                                               | 300                                                               |                   |            |                   |                                                                   |                                                                   |  |                                               |                   |                    |  |                                                                                                                                                                                                                                                                                                                                                                                                                                                                                                                                                                                                                                                                                                                                                                                                                                                                                                                                                                                                                                                                                                                                                                                                         |                   |                   |       |     |    |        |    |     |   |     |     |     |     |     |   |     |     |     |     |     |   |     |     |     |     |     |   |     |     |     |     |     |   |     |     |     |     |      |   |     |     |     |     |     |   |     |     |     |     |     |   |     |     |     |     |     |   |     |     |     |     |     |    |     |     |     |     |     |    |    |     |     |     |     |    |   |    |     |     |     |
| 11                               | 50  | 100                                           | 150                                                               | 200                                                               | 250                                                               |                   |            |                   |                                                                   |                                                                   |  |                                               |                   |                    |  |                                                                                                                                                                                                                                                                                                                                                                                                                                                                                                                                                                                                                                                                                                                                                                                                                                                                                                                                                                                                                                                                                                                                                                                                         |                   |                   |       |     |    |        |    |     |   |     |     |     |     |     |   |     |     |     |     |     |   |     |     |     |     |     |   |     |     |     |     |     |   |     |     |     |     |      |   |     |     |     |     |     |   |     |     |     |     |     |   |     |     |     |     |     |   |     |     |     |     |     |    |     |     |     |     |     |    |    |     |     |     |     |    |   |    |     |     |     |
| 12                               | 0   | 50                                            | 100                                                               | 150                                                               | 200                                                               |                   |            |                   |                                                                   |                                                                   |  |                                               |                   |                    |  |                                                                                                                                                                                                                                                                                                                                                                                                                                                                                                                                                                                                                                                                                                                                                                                                                                                                                                                                                                                                                                                                                                                                                                                                         |                   |                   |       |     |    |        |    |     |   |     |     |     |     |     |   |     |     |     |     |     |   |     |     |     |     |     |   |     |     |     |     |     |   |     |     |     |     |      |   |     |     |     |     |     |   |     |     |     |     |     |   |     |     |     |     |     |   |     |     |     |     |     |    |     |     |     |     |     |    |    |     |     |     |     |    |   |    |     |     |     |
| Winter Trend<br><i>m02 + m03</i> |     | (+)                                           | (-)                                                               | (-)                                                               | (+)                                                               | (+)               |            | (+)               | (-)                                                               | (+)                                                               |  | (+)                                           | (-)               | (+)                |  |                                                                                                                                                                                                                                                                                                                                                                                                                                                                                                                                                                                                                                                                                                                                                                                                                                                                                                                                                                                                                                                                                                                                                                                                         |                   |                   |       |     |    |        |    |     |   |     |     |     |     |     |   |     |     |     |     |     |   |     |     |     |     |     |   |     |     |     |     |     |   |     |     |     |     |      |   |     |     |     |     |     |   |     |     |     |     |     |   |     |     |     |     |     |   |     |     |     |     |     |    |     |     |     |     |     |    |    |     |     |     |     |    |   |    |     |     |     |
| Spring Trend<br><i>m04 + m05</i> |     | (+)                                           | NEG *<br>( <i>r</i> =-0.1257, <i>p</i> =0.05)                     | (-)                                                               | <i>marg-signif</i><br>NEG<br>( <i>r</i> =-0.0612, <i>p</i> =0.30) | (-)               |            | (-)               | (-)                                                               | NEG *<br>( <i>r</i> =-0.0698, <i>p</i> =0.05)                     |  | (+)                                           | (-)               | (+)                |  |                                                                                                                                                                                                                                                                                                                                                                                                                                                                                                                                                                                                                                                                                                                                                                                                                                                                                                                                                                                                                                                                                                                                                                                                         |                   |                   |       |     |    |        |    |     |   |     |     |     |     |     |   |     |     |     |     |     |   |     |     |     |     |     |   |     |     |     |     |     |   |     |     |     |     |      |   |     |     |     |     |     |   |     |     |     |     |     |   |     |     |     |     |     |   |     |     |     |     |     |    |     |     |     |     |     |    |    |     |     |     |     |    |   |    |     |     |     |
| Summer Trend<br><i>m06 + m07</i> |     | (-)                                           | (+)                                                               | (+)                                                               | <i>marg-signif</i><br>NEG<br>( <i>r</i> =-0.0405, <i>p</i> =0.10) | (-)               |            | (-)               | <i>marg-signif</i><br>NEG<br>( <i>r</i> =-0.0875, <i>p</i> =0.10) | <i>marg-signif</i><br>NEG<br>( <i>r</i> =-0.0219, <i>p</i> =0.10) |  | (-)                                           | (-)               | (-)                |  |                                                                                                                                                                                                                                                                                                                                                                                                                                                                                                                                                                                                                                                                                                                                                                                                                                                                                                                                                                                                                                                                                                                                                                                                         |                   |                   |       |     |    |        |    |     |   |     |     |     |     |     |   |     |     |     |     |     |   |     |     |     |     |     |   |     |     |     |     |     |   |     |     |     |     |      |   |     |     |     |     |     |   |     |     |     |     |     |   |     |     |     |     |     |   |     |     |     |     |     |    |     |     |     |     |     |    |    |     |     |     |     |    |   |    |     |     |     |
| Autumn Trend<br><i>m10 + m11</i> |     | NEG *<br>( <i>r</i> =-0.0829, <i>p</i> =0.05) | <i>marg-signif</i><br>NEG<br>( <i>r</i> =-0.0610, <i>p</i> =0.10) | NEG **<br>( <i>r</i> =-0.1196, <i>p</i> =0.01)                    | NEG *<br>( <i>r</i> =-0.1349, <i>p</i> =0.05)                     | (-)               |            | (+)               | <i>marg-signif</i><br>NEG<br>( <i>r</i> =-0.0691, <i>p</i> =0.10) | NEG *<br>( <i>r</i> =-0.0923, <i>p</i> =0.05)                     |  | NEG *<br>( <i>r</i> =-0.0687, <i>p</i> =0.05) | (+)               | (+)                |  |                                                                                                                                                                                                                                                                                                                                                                                                                                                                                                                                                                                                                                                                                                                                                                                                                                                                                                                                                                                                                                                                                                                                                                                                         |                   |                   |       |     |    |        |    |     |   |     |     |     |     |     |   |     |     |     |     |     |   |     |     |     |     |     |   |     |     |     |     |     |   |     |     |     |     |      |   |     |     |     |     |     |   |     |     |     |     |     |   |     |     |     |     |     |   |     |     |     |     |     |    |     |     |     |     |     |    |    |     |     |     |     |    |   |    |     |     |     |

### S-A11.c *Averages-n-Trends plots*

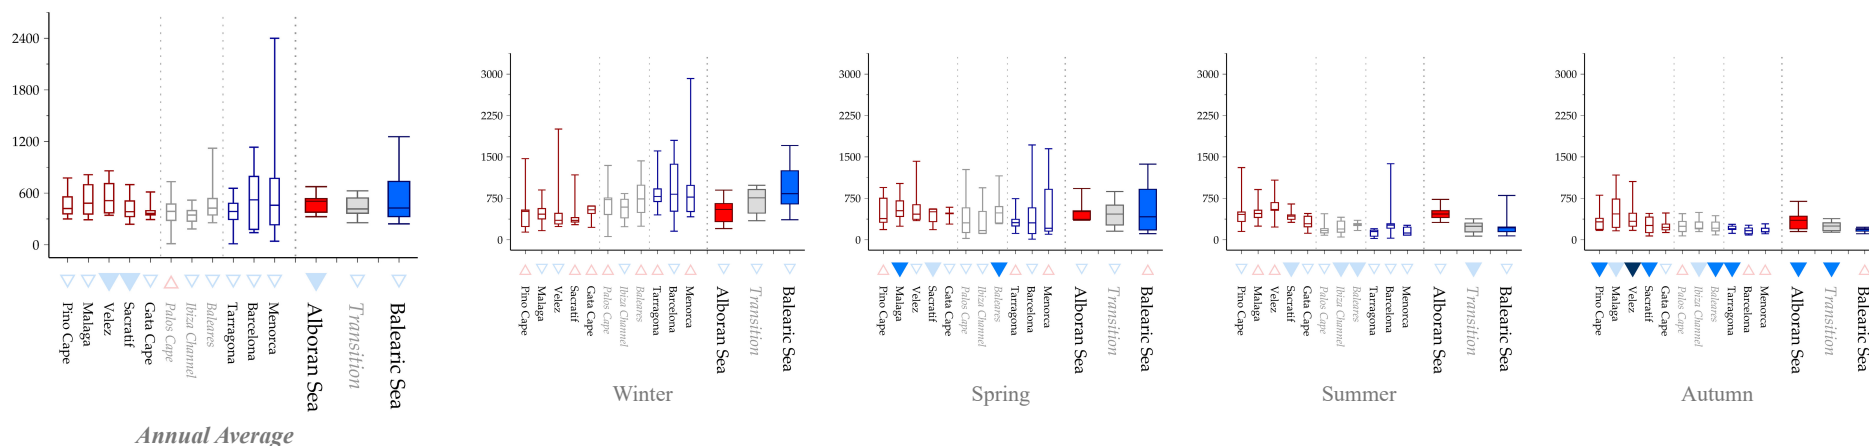

**Table S-A12** Total Cladocera (ind. m<sup>-3</sup>) trends in the western Mediterranean Sea (2007-2017)

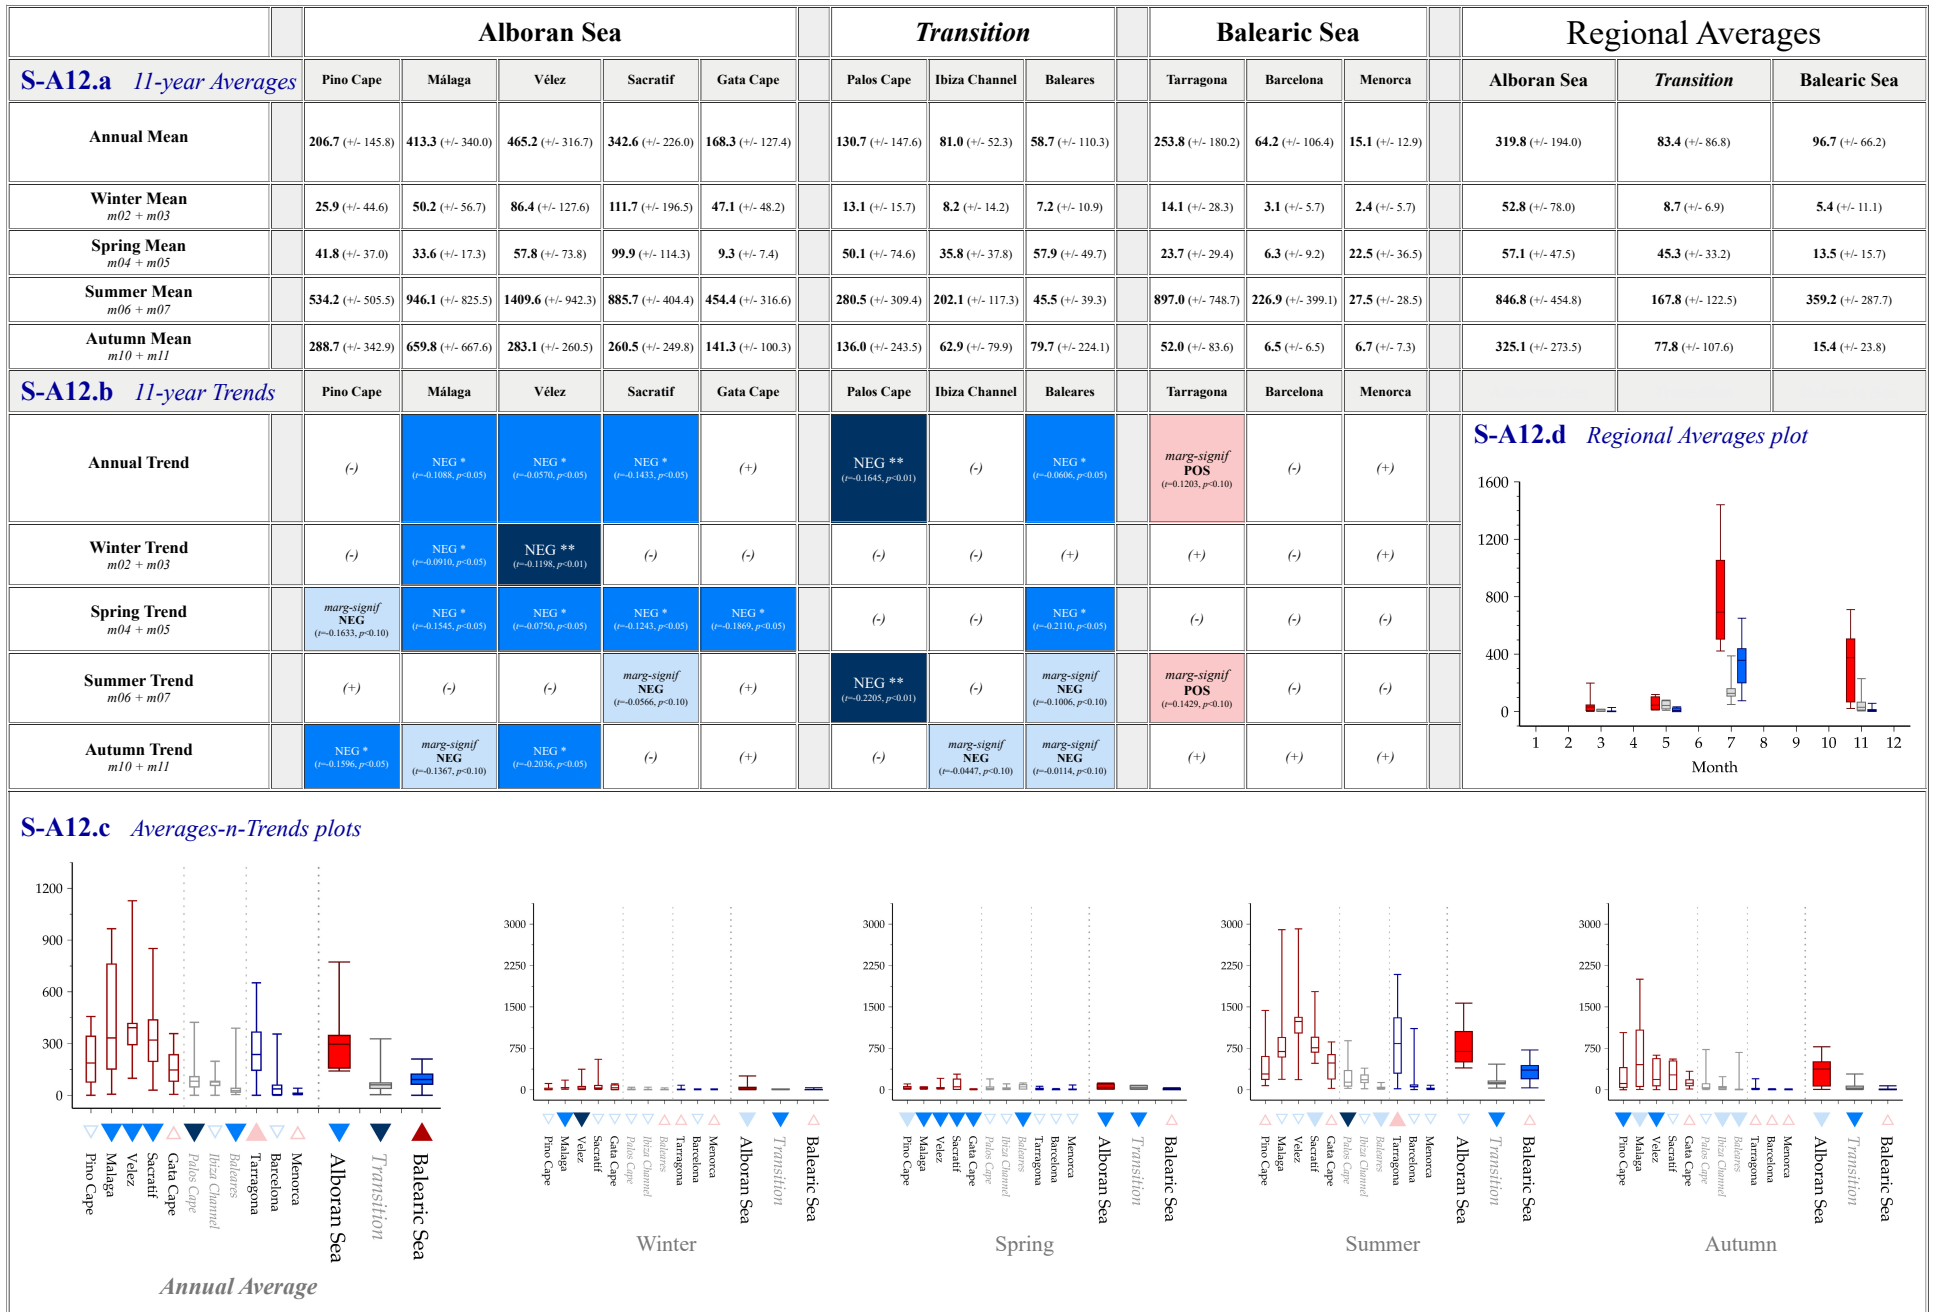

**Table S-A13** Total Ostracods (ind. m<sup>-3</sup>) trends in the western Mediterranean Sea (2007-2017)

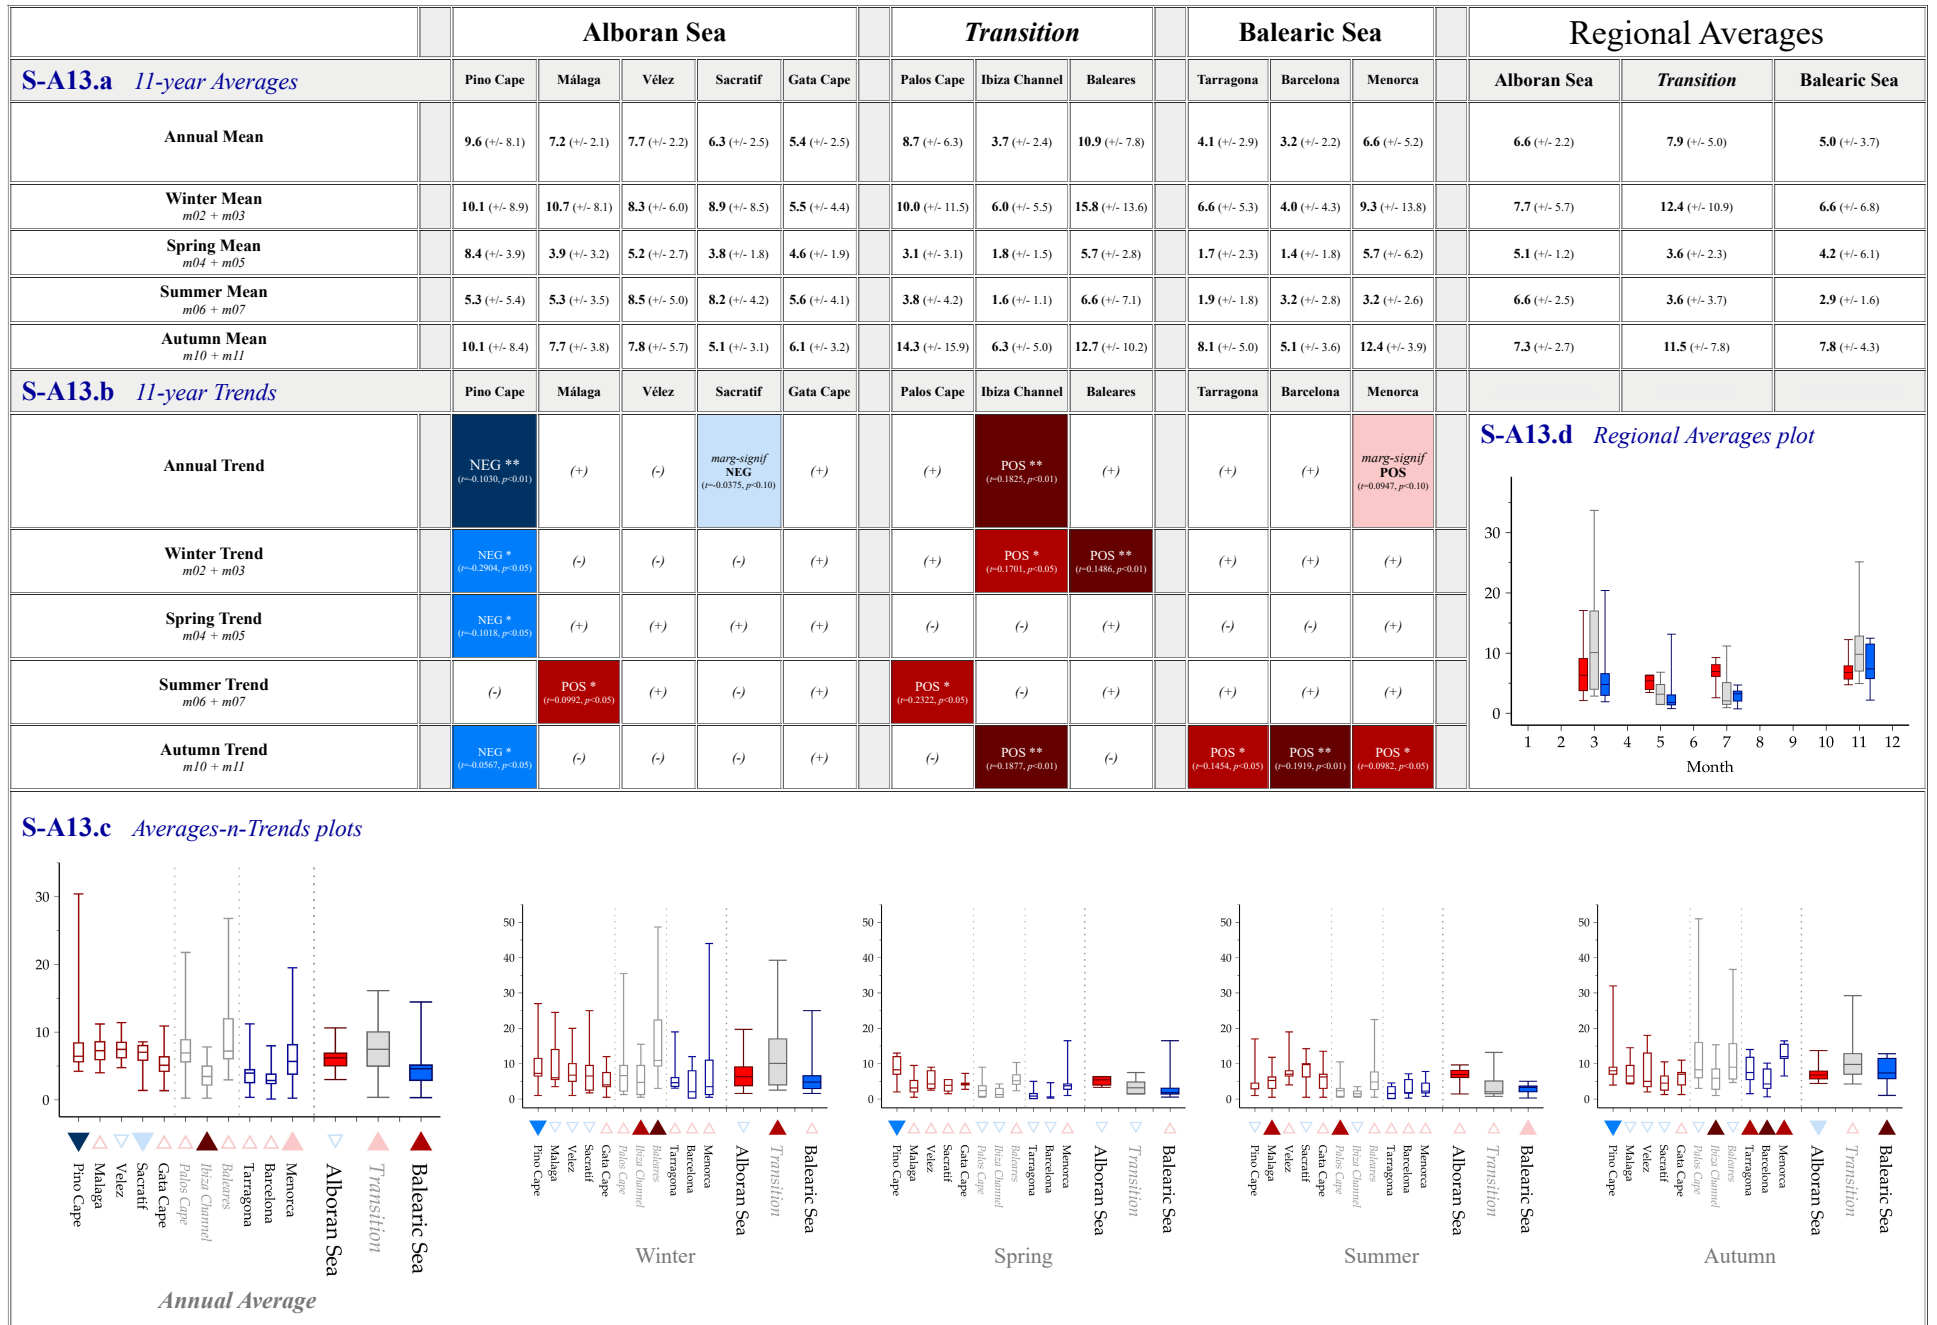

**Table S-A14** Total Euphausiids (ind. m<sup>-3</sup>) trends in the western Mediterranean Sea (2007-2017)

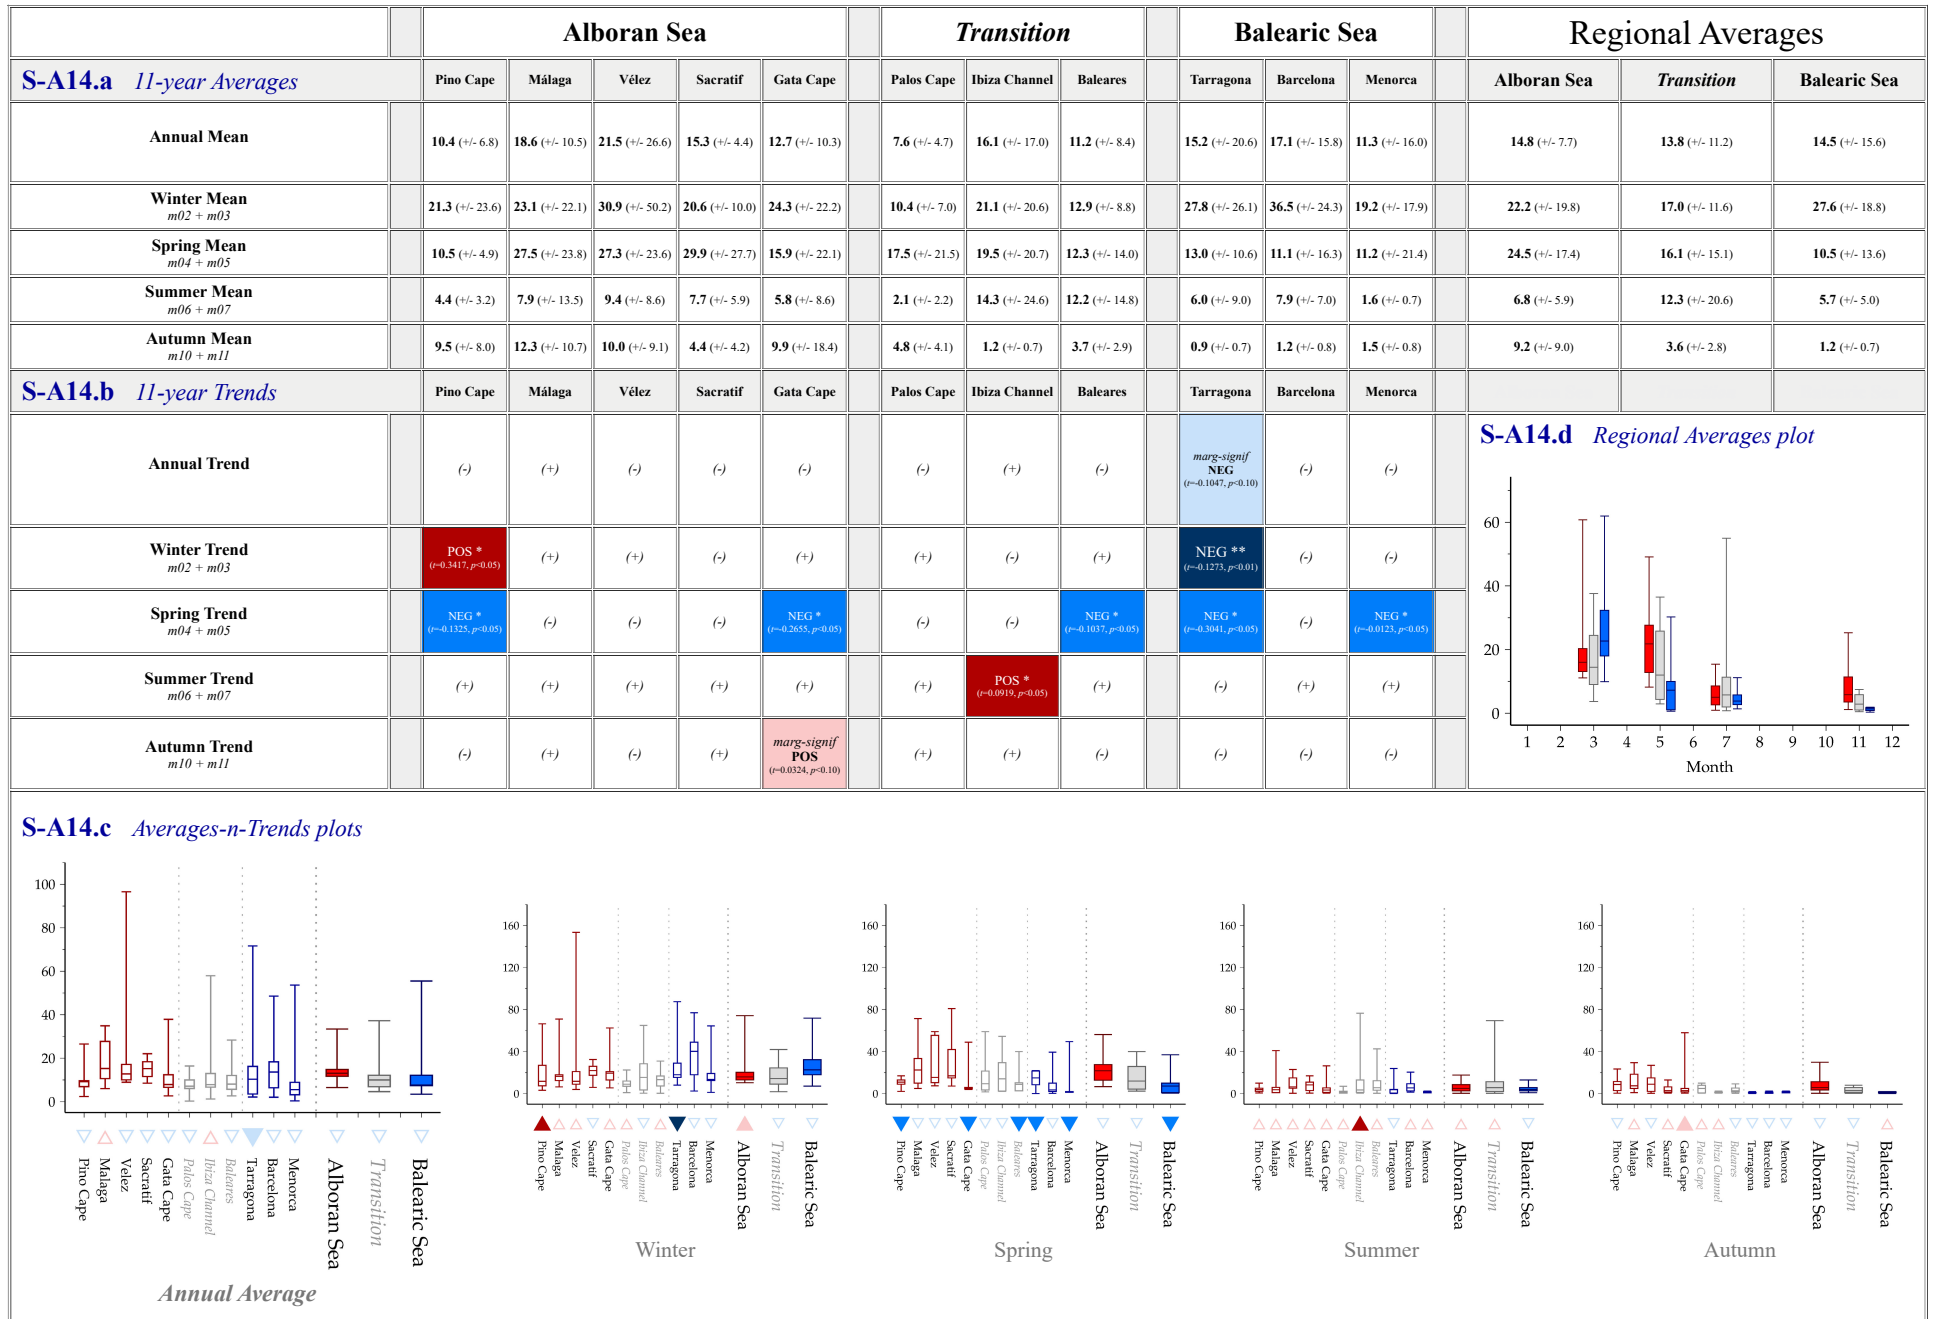

**Table S-A15** Total Amphipods (ind. m<sup>-3</sup>) trends in the western Mediterranean Sea (2007-2017)

|                                  |  | Alboran Sea   |               |                                                                   |               |                                               |  |  | Transition                                                       |               |               |  |  | Balearic Sea  |                                                                  |                                                                  |                                |  | Regional Averages |               |               |
|----------------------------------|--|---------------|---------------|-------------------------------------------------------------------|---------------|-----------------------------------------------|--|--|------------------------------------------------------------------|---------------|---------------|--|--|---------------|------------------------------------------------------------------|------------------------------------------------------------------|--------------------------------|--|-------------------|---------------|---------------|
| S-A15.a 11-year Averages         |  | Pino Cape     | Málaga        | Vélez                                                             | Sacratif      | Gata Cape                                     |  |  | Palos Cape                                                       | Ibiza Channel | Baleares      |  |  | Tarragona     | Barcelona                                                        | Menorca                                                          |                                |  | Alboran Sea       | Transition    | Balearic Sea  |
| Annual Mean                      |  | 0.3 (+/- 0.3) | 0.7 (+/- 0.6) | 0.8 (+/- 0.5)                                                     | 2.1 (+/- 3.8) | 0.7 (+/- 0.3)                                 |  |  | 0.8 (+/- 0.4)                                                    | 0.8 (+/- 0.6) | 0.7 (+/- 0.6) |  |  | 0.6 (+/- 0.7) | 0.3 (+/- 0.1)                                                    | 1.0 (+/- 0.4)                                                    |                                |  | 0.8 (+/- 1.1)     | 0.7 (+/- 0.3) | 0.6 (+/- 0.5) |
| Winter Mean<br><i>m02 + m03</i>  |  | 0.4 (+/- 0.6) | 0.3 (+/- 0)   | 0.7 (+/- 0.5)                                                     | 3.8 (+/- 9.6) | 0.7 (+/- 0.5)                                 |  |  | 0.9 (+/- 1.1)                                                    | 0.9 (+/- 0.8) | 1.3 (+/- 1.4) |  |  | 0.5 (+/- 0.8) | 0.1 (+/- )                                                       | 0.5 (+/- 0)                                                      |                                |  | 1.1 (+/- 2.5)     | 1.1 (+/- 0.9) | 0.2 (+/- 0.3) |
| Spring Mean<br><i>m04 + m05</i>  |  | 0.3 (+/- 0.4) | 1.1 (+/- 1.3) | 1.1 (+/- 1.7)                                                     | 0.6 (+/- 0.9) | 0.8 (+/- 0.6)                                 |  |  | 0.6 (+/- 0.1)                                                    | 0.5 (+/- 0.4) | 0.5 (+/- 0.5) |  |  | 0.3 (+/- 0.2) | 0.3 (+/- 0.2)                                                    | 1.9 (+/- 2.0)                                                    |                                |  | 0.6 (+/- 0.7)     | 0.5 (+/- 0.3) | 1.3 (+/- 2.1) |
| Summer Mean<br><i>m06 + m07</i>  |  | 0.1 (+/- 0)   | 0.5 (+/- 0.7) | 0.8 (+/- 1.1)                                                     | 1.1 (+/- 1.2) | 0.9 (+/- 1.0)                                 |  |  | 0.7 (+/- 0.3)                                                    | 0.8 (+/- 0.6) | 0.6 (+/- 0.5) |  |  | 0.5 (+/- 0.5) | 0.3 (+/- 0.3)                                                    | 1.0 (+/- 0.5)                                                    |                                |  | 0.6 (+/- 0.7)     | 0.6 (+/- 0.3) | 0.4 (+/- 0.4) |
| Autumn Mean<br><i>m10 + m11</i>  |  | 0.9 (+/- 0.9) | 0.7 (+/- 0.6) | 0.7 (+/- 0.7)                                                     | 0.5 (+/- 0.4) | 0.8 (+/- 0.3)                                 |  |  | 0.9 (+/- 0.4)                                                    | 0.7 (+/- 0.4) | 0.5 (+/- 0.3) |  |  | 0.4 (+/- 0.2) | 0.6 (+/- 0.6)                                                    | 0.9 (+/- 0.3)                                                    |                                |  | 0.6 (+/- 0.3)     | 0.6 (+/- 0.3) | 0.6 (+/- 0.3) |
| S-A15.b 11-year Trends           |  | Pino Cape     | Málaga        | Vélez                                                             | Sacratif      | Gata Cape                                     |  |  | Palos Cape                                                       | Ibiza Channel | Baleares      |  |  | Tarragona     | Barcelona                                                        | Menorca                                                          |                                |  |                   |               |               |
| Annual Trend                     |  | (-)           | (-)           | <i>marg-signif</i><br>NEG<br>( <i>r</i> =-0.0909, <i>p</i> =0.10) | (+)           | (-)                                           |  |  | (+)                                                              | (-)           | (-)           |  |  | (+)           | <i>marg-signif</i><br>POS<br>( <i>r</i> =0.0889, <i>p</i> =0.10) | POS *                                                            | S-A15.d Regional Averages plot |  |                   |               |               |
| Winter Trend<br><i>m02 + m03</i> |  | (+)           |               | (+)                                                               | (+)           | (+)                                           |  |  | (+)                                                              | (-)           | (-)           |  |  | (+)           |                                                                  |                                                                  | Total Amphipods                |  |                   |               |               |
| Spring Trend<br><i>m04 + m05</i> |  | (+)           | (-)           | (-)                                                               | (+)           | NEG *<br>( <i>r</i> =-0.1185, <i>p</i> =0.05) |  |  | <i>marg-signif</i><br>POS<br>( <i>r</i> =0.0536, <i>p</i> =0.10) | (-)           | (-)           |  |  | (+)           | (-)                                                              | <i>marg-signif</i><br>POS<br>( <i>r</i> =0.2086, <i>p</i> =0.10) | Abundance (#/m3)               |  |                   |               |               |
| Summer Trend<br><i>m06 + m07</i> |  |               | (+)           | (-)                                                               | (+)           | (+)                                           |  |  | (+)                                                              | (-)           | (+)           |  |  | (+)           | (+)                                                              | (+)                                                              | Month                          |  |                   |               |               |
| Autumn Trend<br><i>m10 + m11</i> |  | (-)           | (+)           | (-)                                                               | (-)           | (-)                                           |  |  | (-)                                                              | (-)           | (+)           |  |  | (-)           | (+)                                                              | NEG **<br>( <i>r</i> =-0.1151, <i>p</i> =0.01)                   |                                |  |                   |               |               |

### S-A15.c *Averages-n-Trends plots*

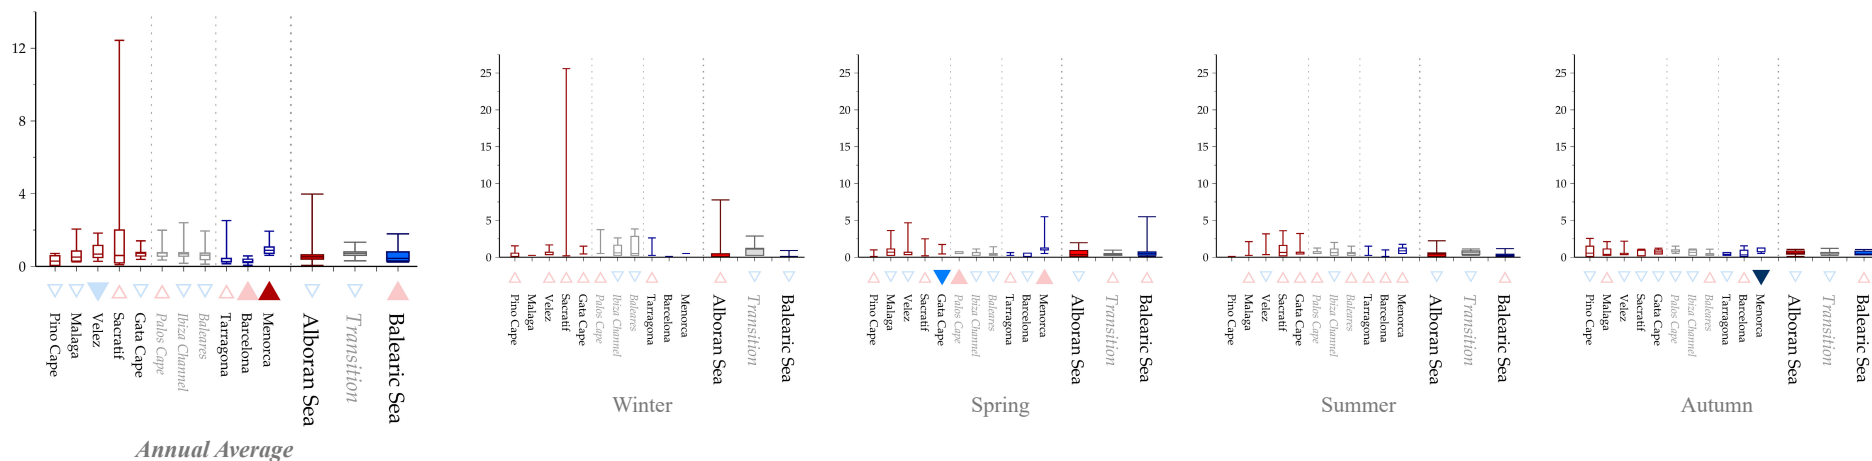

Table S-A16 Total Isopods (ind. m<sup>-3</sup>) trends in the western Mediterranean Sea (2007-2017)

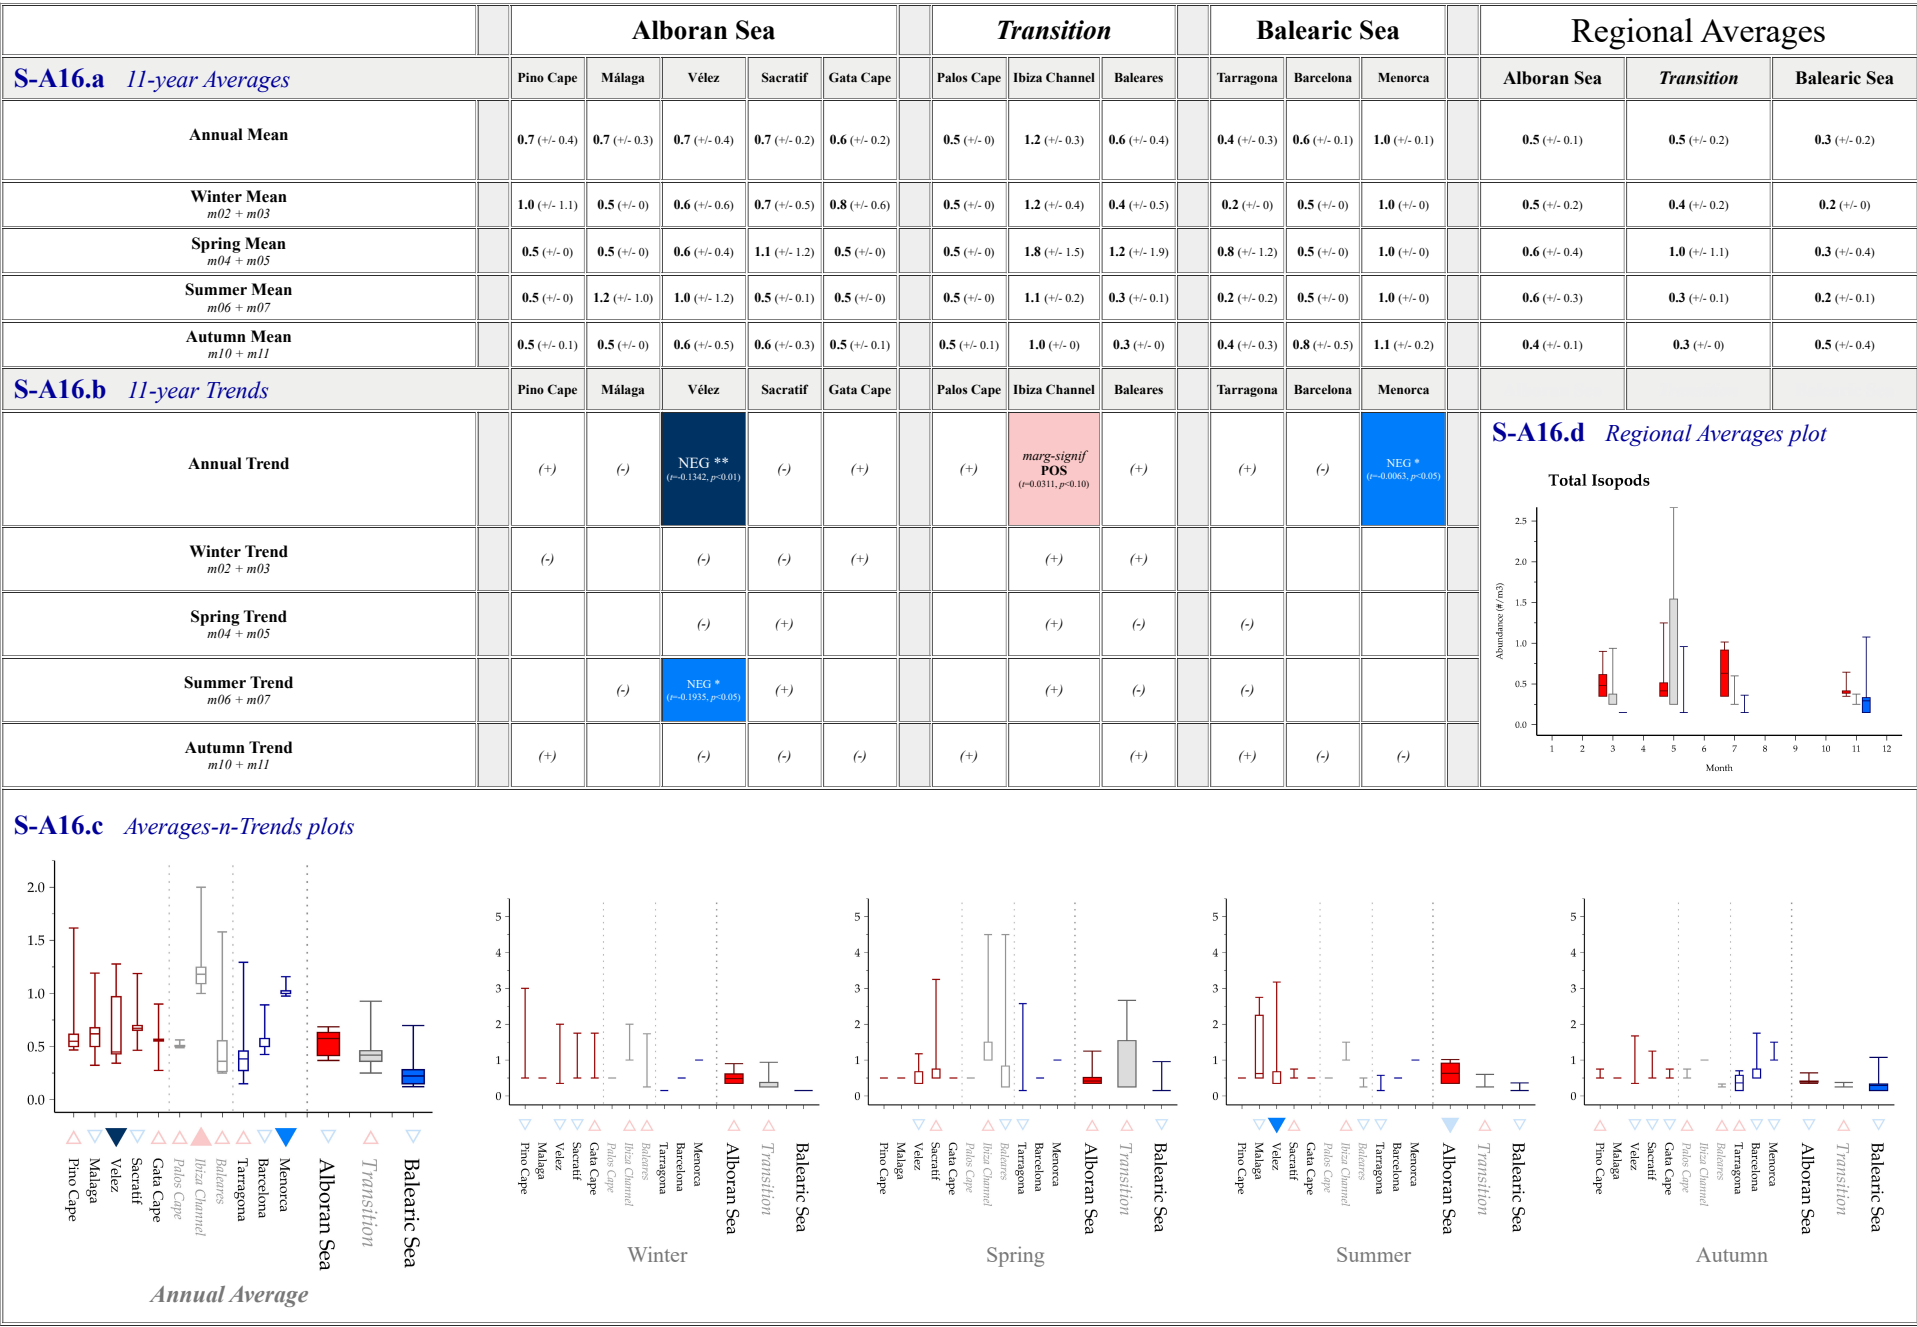

Table S-A17 Total Decapod Larvae (ind. m<sup>-3</sup>) trends in the western Mediterranean Sea (2007-2017)

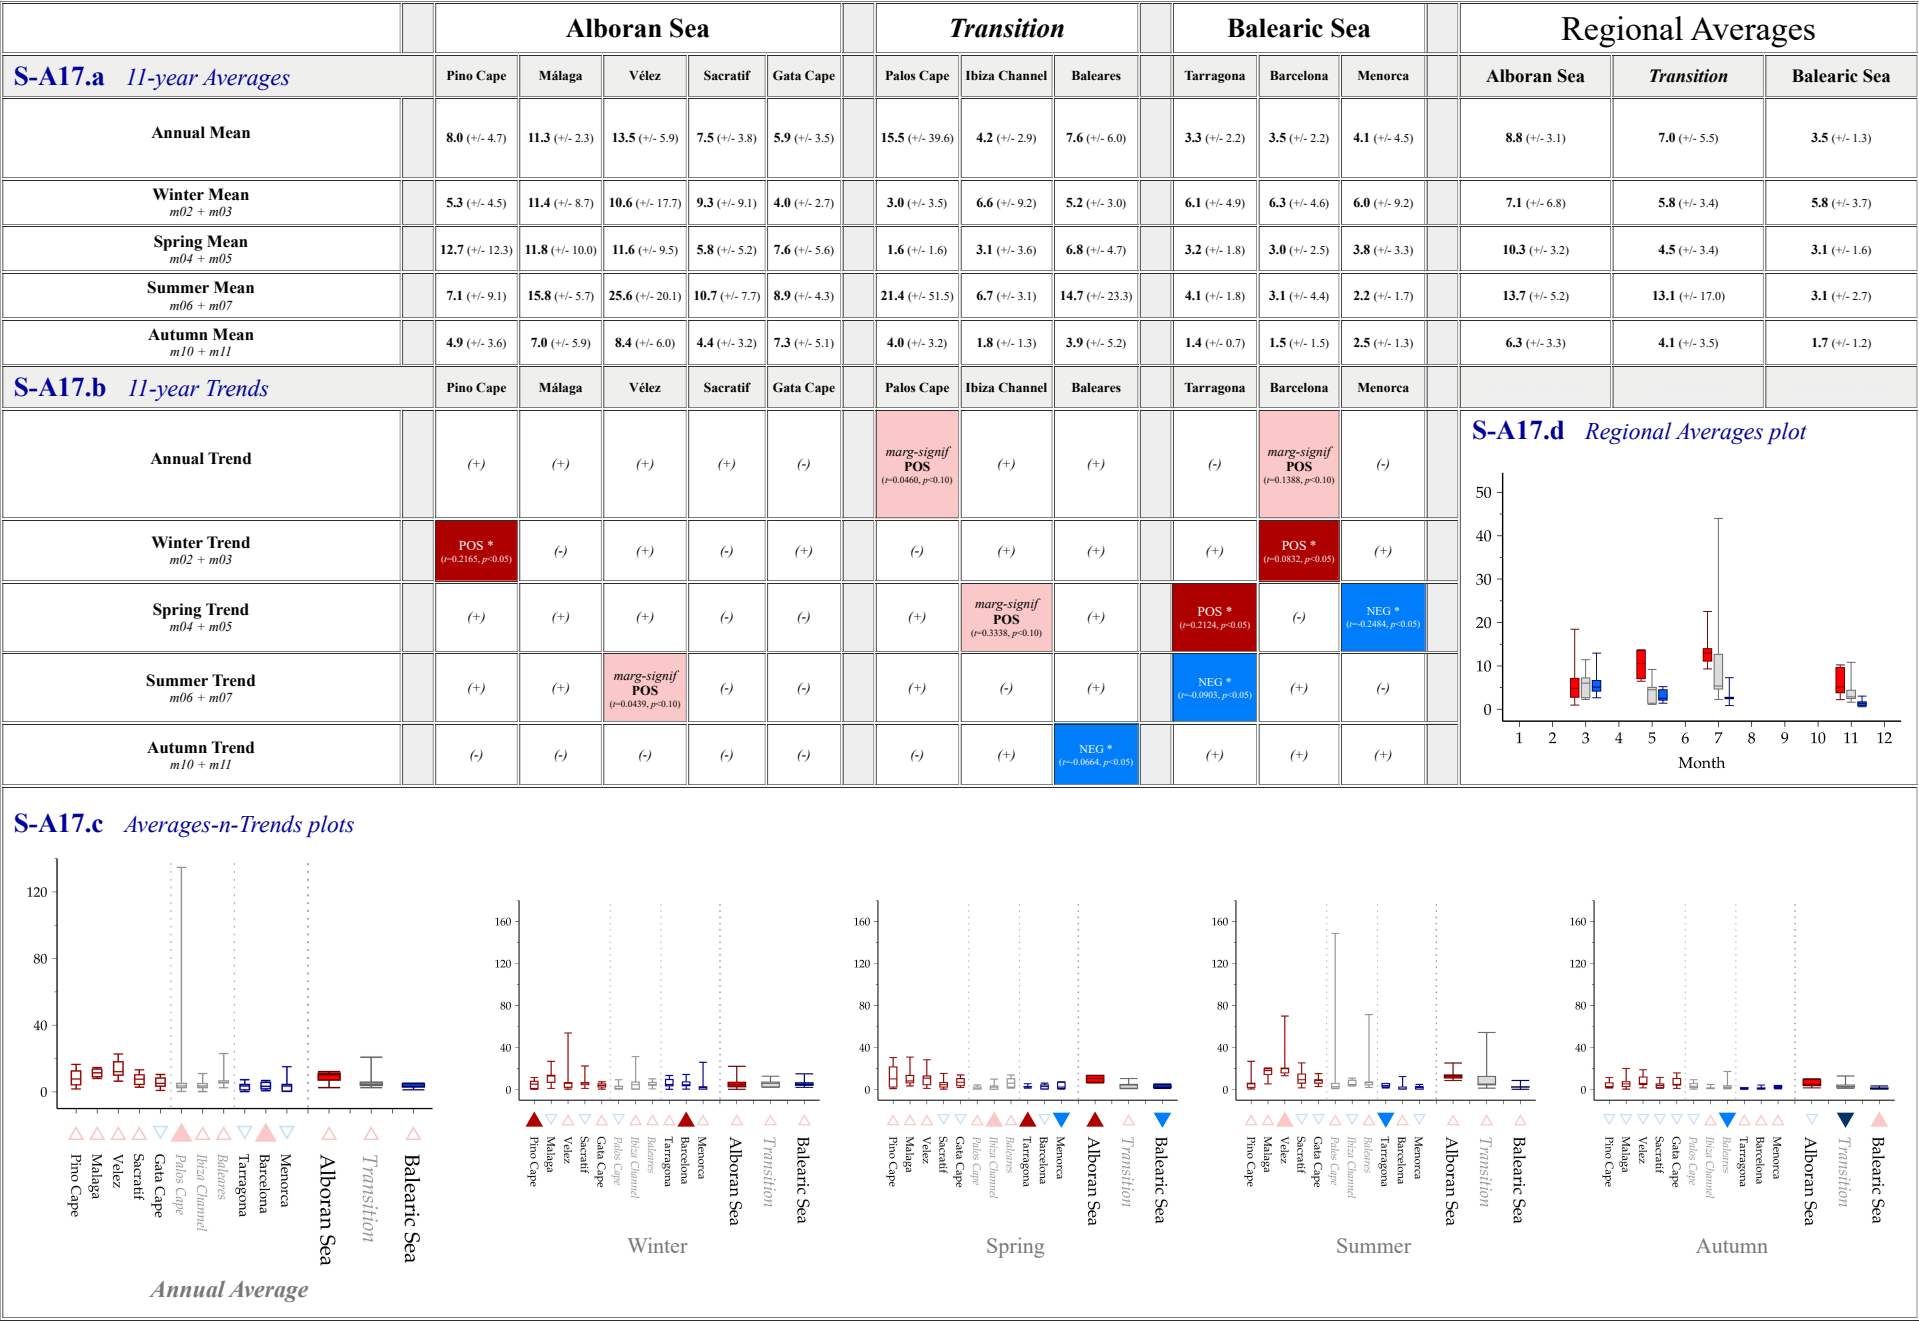

**Table S-A18** Total Chaetognaths (ind. m<sup>-3</sup>) trends in the western Mediterranean Sea (2007-2017)

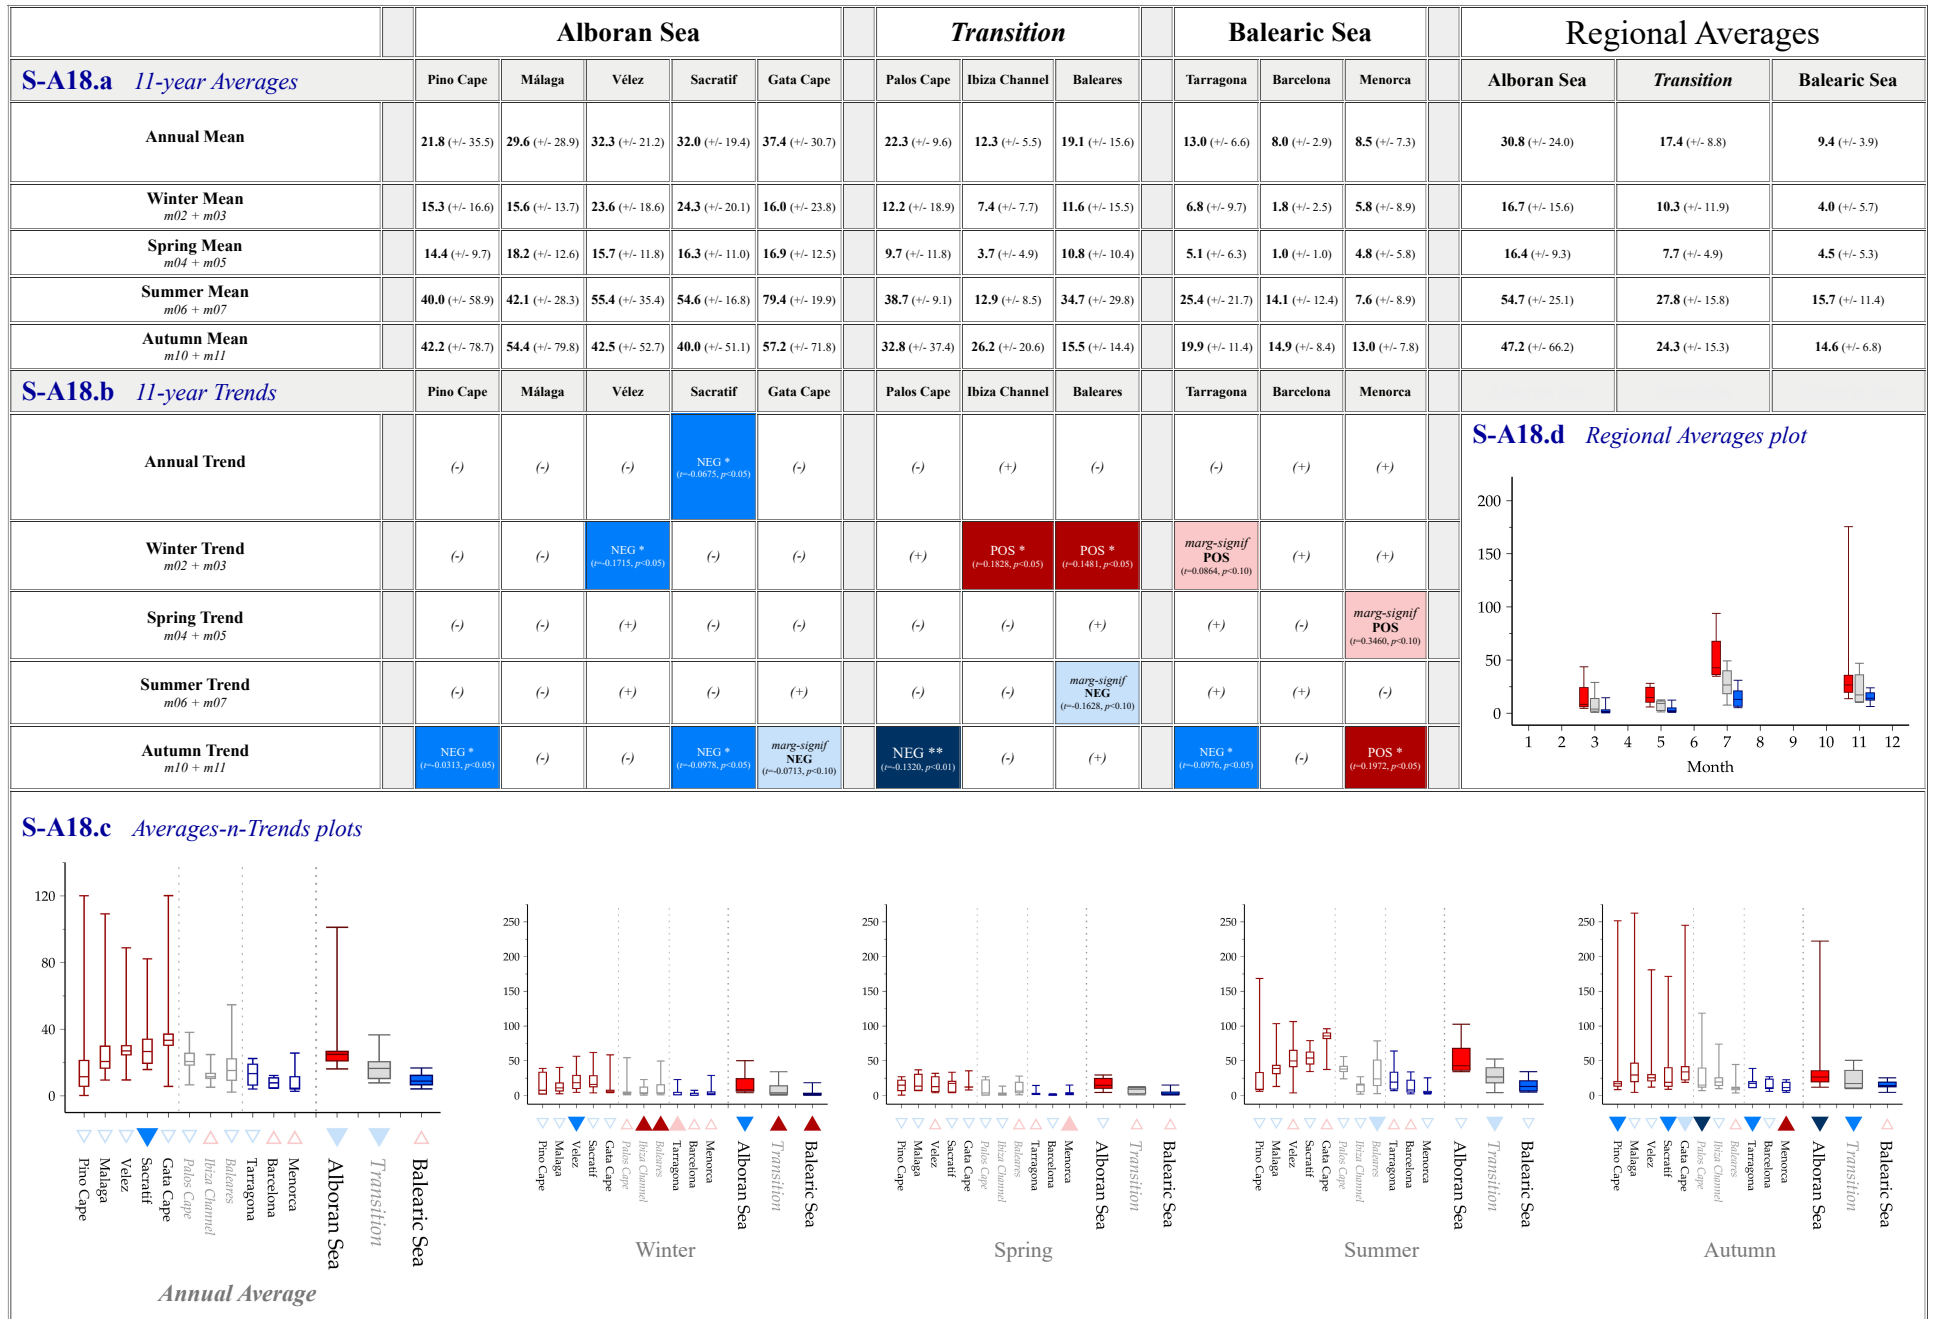



**Table S-A19** Total Pteropods (ind. m<sup>-3</sup>) trends in the western Mediterranean Sea (2007-2017)

### S-A19.a 11-year Averages

|                                        | Pino Cape      | Málaga         | Vélez          | Sacratif      | Gata Cape      | Palos Cape     | Ibiza Channel   | Baleares       | Tarragona       | Barcelona       | Menorca       | Alboran Sea   | Transition      | Balearic Sea    |
|----------------------------------------|----------------|----------------|----------------|---------------|----------------|----------------|-----------------|----------------|-----------------|-----------------|---------------|---------------|-----------------|-----------------|
| <b>Annual Mean</b>                     | 4.6 (+/- 5.4)  | 4.7 (+/- 5.0)  | 5.0 (+/- 5.0)  | 4.4 (+/- 3.3) | 6.5 (+/- 7.4)  | 5.5 (+/- 3.9)  | 11.0 (+/- 10.6) | 5.7 (+/- 3.6)  | 16.4 (+/- 19.1) | 5.3 (+/- 3.1)   | 4.6 (+/- 2.5) | 4.7 (+/- 4.3) | 7.3 (+/- 5.0)   | 7.6 (+/- 4.6)   |
| <b>Winter Mean</b><br><i>m02 + m03</i> | 3.1 (+/- 6.1)  | 1.0 (+/- 0.9)  | 2.5 (+/- 3.2)  | 0.8 (+/- 0.6) | 1.3 (+/- 1.8)  | 5.3 (+/- 12.6) | 3.7 (+/- 6.9)   | 5.3 (+/- 10.1) | 7.2 (+/- 9.3)   | 2.3 (+/- 2.3)   | 3.7 (+/- 5.6) | 1.8 (+/- 2.2) | 4.8 (+/- 9.0)   | 3.8 (+/- 4.9)   |
| <b>Spring Mean</b><br><i>m04 + m05</i> | 4.6 (+/- 5.3)  | 8.2 (+/- 14.9) | 6.2 (+/- 12.2) | 7.4 (+/- 8.6) | 4.2 (+/- 3.7)  | 2.6 (+/- 4.2)  | 2.4 (+/- 2.8)   | 2.5 (+/- 3.4)  | 1.4 (+/- 1.1)   | 2.3 (+/- 2.6)   | 2.0 (+/- 1.6) | 6.1 (+/- 9.0) | 2.6 (+/- 1.7)   | 1.7 (+/- 1.2)   |
| <b>Summer Mean</b><br><i>m06 + m07</i> | 7.4 (+/- 14.2) | 4.5 (+/- 5.8)  | 3.6 (+/- 4.9)  | 4.7 (+/- 3.6) | 8.4 (+/- 9.3)  | 8.8 (+/- 6.9)  | 15.9 (+/- 26.9) | 5.1 (+/- 4.6)  | 41.7 (+/- 79.0) | 5.9 (+/- 4.7)   | 4.3 (+/- 3.8) | 5.6 (+/- 6.6) | 9.4 (+/- 10.0)  | 15.7 (+/- 25.6) |
| <b>Autumn Mean</b><br><i>m10 + m11</i> | 4.0 (+/- 4.5)  | 6.3 (+/- 8.3)  | 5.7 (+/- 6.7)  | 4.4 (+/- 7.2) | 7.6 (+/- 10.0) | 5.8 (+/- 7.5)  | 18.9 (+/- 27.0) | 9.2 (+/- 9.1)  | 12.9 (+/- 10.9) | 10.2 (+/- 12.7) | 6.4 (+/- 5.0) | 5.5 (+/- 6.7) | 10.7 (+/- 12.3) | 9.3 (+/- 8.8)   |

### S-A19.b 11-year Trends

|                                         | Pino Cape                                                        | Málaga                                                           | Vélez                                                            | Sacratif                                                         | Gata Cape                                    | Palos Cape | Ibiza Channel                                | Baleares                                                         | Tarragona                                                        | Barcelona                                                        | Menorca | Alboran Sea | Transition | Balearic Sea |
|-----------------------------------------|------------------------------------------------------------------|------------------------------------------------------------------|------------------------------------------------------------------|------------------------------------------------------------------|----------------------------------------------|------------|----------------------------------------------|------------------------------------------------------------------|------------------------------------------------------------------|------------------------------------------------------------------|---------|-------------|------------|--------------|
| <b>Annual Trend</b>                     | <i>marg-signif</i><br>POS<br>( <i>r</i> =0.0279, <i>p</i> =0.10) | POS *<br>( <i>r</i> =0.1217, <i>p</i> =0.05)                     | POS **<br>( <i>r</i> =0.1762, <i>p</i> =0.01)                    | POS *<br>( <i>r</i> =0.1265, <i>p</i> =0.05)                     | POS *<br>( <i>r</i> =0.1151, <i>p</i> =0.05) | (+)        | NEG *<br>( <i>r</i> =0.1358, <i>p</i> =0.05) | <i>marg-signif</i><br>POS<br>( <i>r</i> =0.0833, <i>p</i> =0.10) | (+)                                                              | <i>marg-signif</i><br>POS<br>( <i>r</i> =0.1163, <i>p</i> =0.10) | (+)     |             |            |              |
| <b>Winter Trend</b><br><i>m02 + m03</i> | (+)                                                              | (-)                                                              | (+)                                                              | (+)                                                              | (+)                                          | (+)        | (+)                                          | POS **<br>( <i>r</i> =0.0781, <i>p</i> =0.01)                    | POS *<br>( <i>r</i> =0.1792, <i>p</i> =0.05)                     | POS *<br>( <i>r</i> =0.2151, <i>p</i> =0.05)                     | (+)     |             |            |              |
| <b>Spring Trend</b><br><i>m04 + m05</i> | (+)                                                              | <i>marg-signif</i><br>POS<br>( <i>r</i> =0.1218, <i>p</i> =0.10) | POS *<br>( <i>r</i> =0.0578, <i>p</i> =0.05)                     | <i>marg-signif</i><br>POS<br>( <i>r</i> =0.1774, <i>p</i> =0.10) | (-)                                          | (+)        | (+)                                          | (+)                                                              | <i>marg-signif</i><br>POS<br>( <i>r</i> =0.3000, <i>p</i> =0.10) | (-)                                                              | (+)     |             |            |              |
| <b>Summer Trend</b><br><i>m06 + m07</i> | <i>marg-signif</i><br>POS<br>( <i>r</i> =0.0858, <i>p</i> =0.10) | POS *<br>( <i>r</i> =0.2083, <i>p</i> =0.05)                     | POS *<br>( <i>r</i> =0.2948, <i>p</i> =0.05)                     | POS *<br>( <i>r</i> =0.1530, <i>p</i> =0.05)                     | POS *<br>( <i>r</i> =0.1630, <i>p</i> =0.05) | (+)        | (-)                                          | (+)                                                              | (+)                                                              | <i>marg-signif</i><br>POS<br>( <i>r</i> =0.2220, <i>p</i> =0.10) | (-)     |             |            |              |
| <b>Autumn Trend</b><br><i>m10 + m11</i> | (+)                                                              | (+)                                                              | <i>marg-signif</i><br>POS<br>( <i>r</i> =0.1094, <i>p</i> =0.10) | (+)                                                              | POS *<br>( <i>r</i> =0.0694, <i>p</i> =0.05) | (+)        | (-)                                          | (-)                                                              | (-)                                                              | (+)                                                              | (+)     |             |            |              |

### S-A19.c Averages-n-Trends plots

### S-A19.d Regional Averages plot

### S-A19.d Regional Averages plot

**Table S-A20** Total Polychaetes (ind. m<sup>-3</sup>) trends in the western Mediterranean Sea (2007-2017)

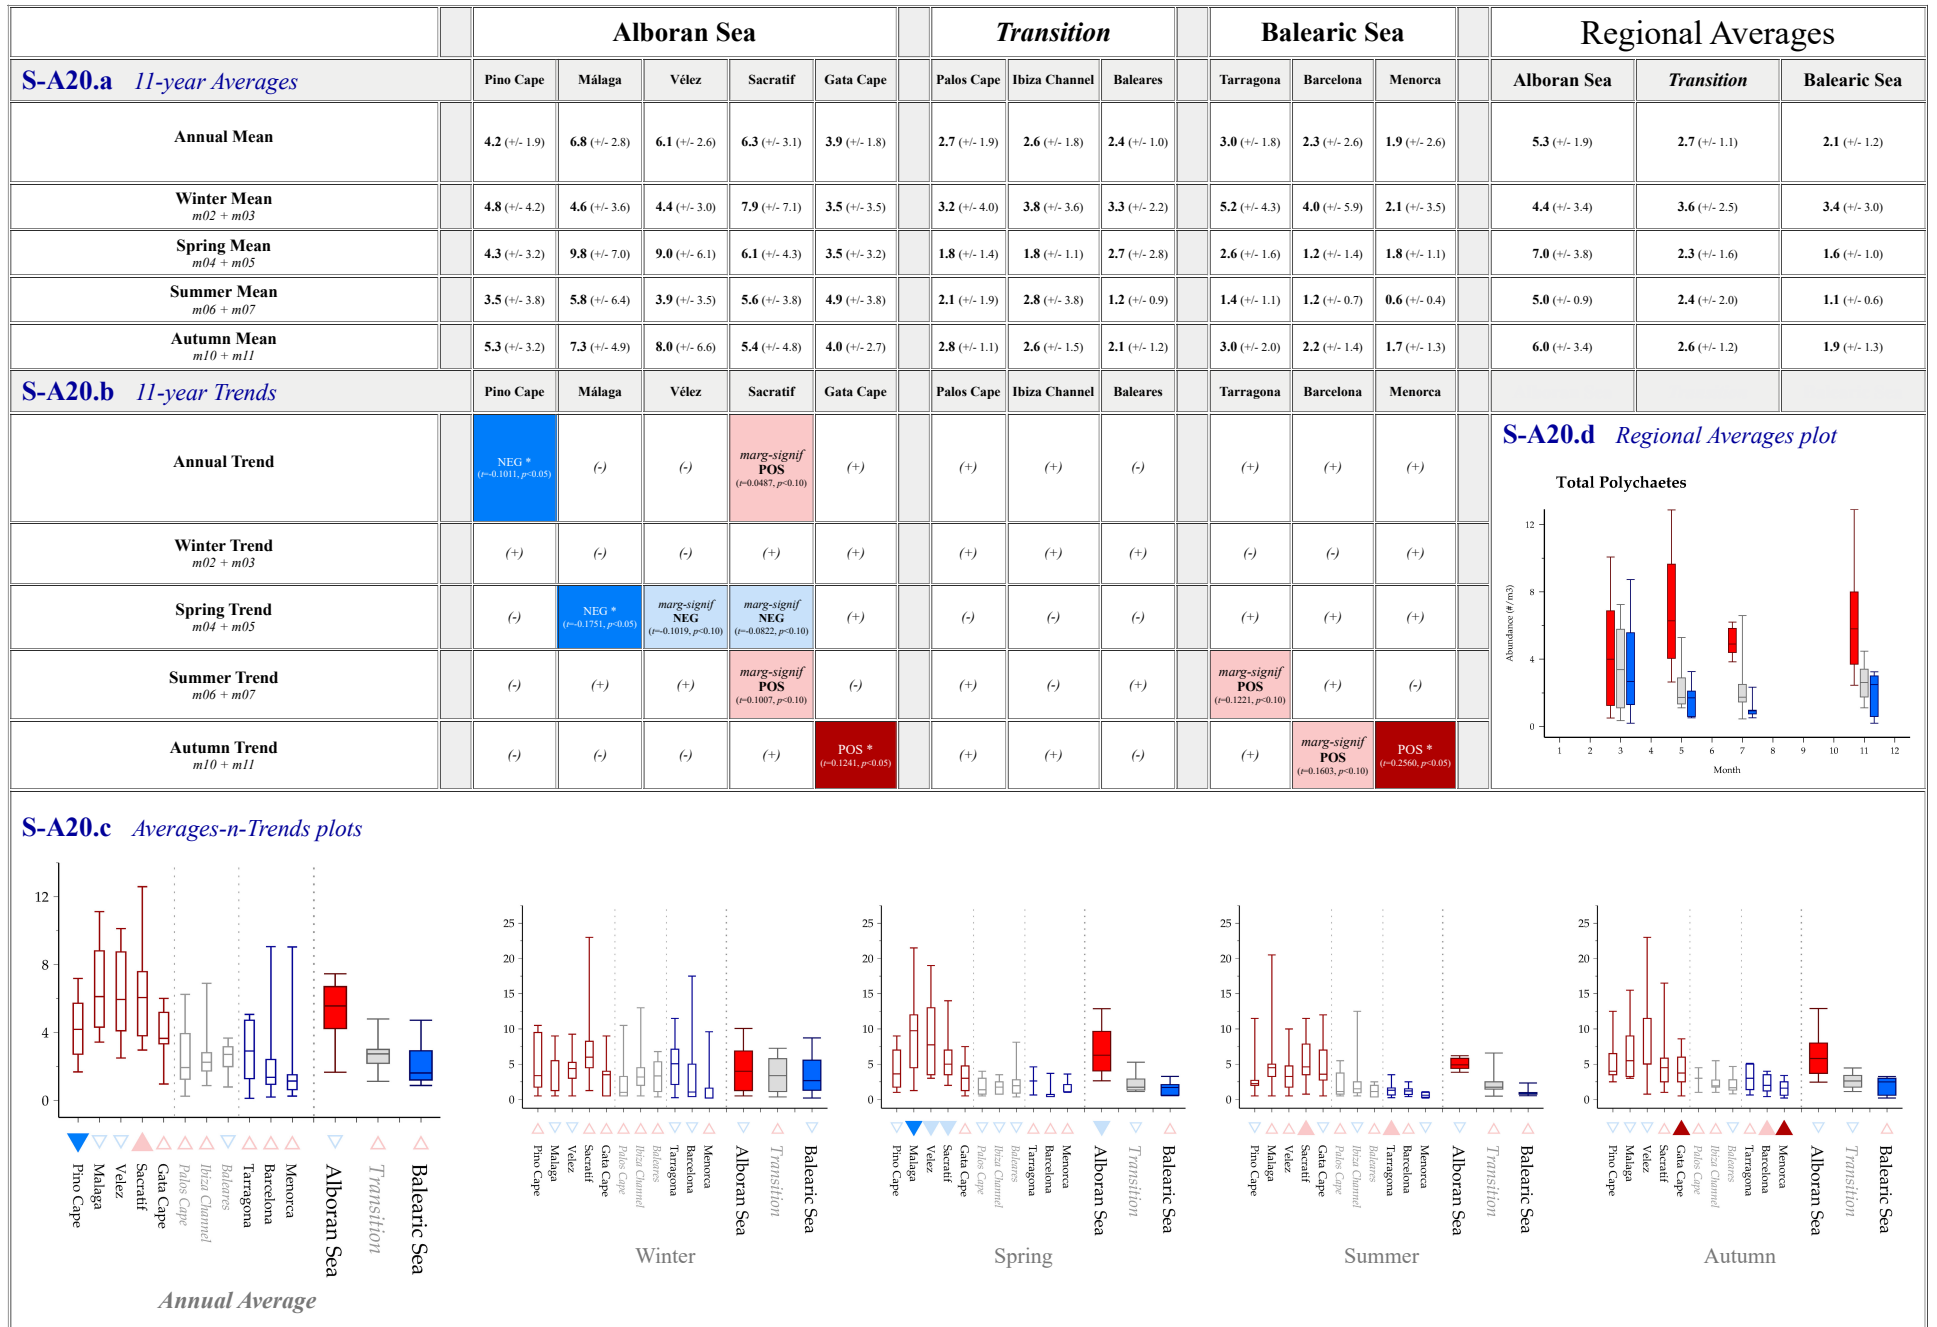

**Table S-A21** Total Other Meroplankton Larvae (ind. m<sup>-3</sup>) trends in the western Mediterranean Sea (2007-2017)

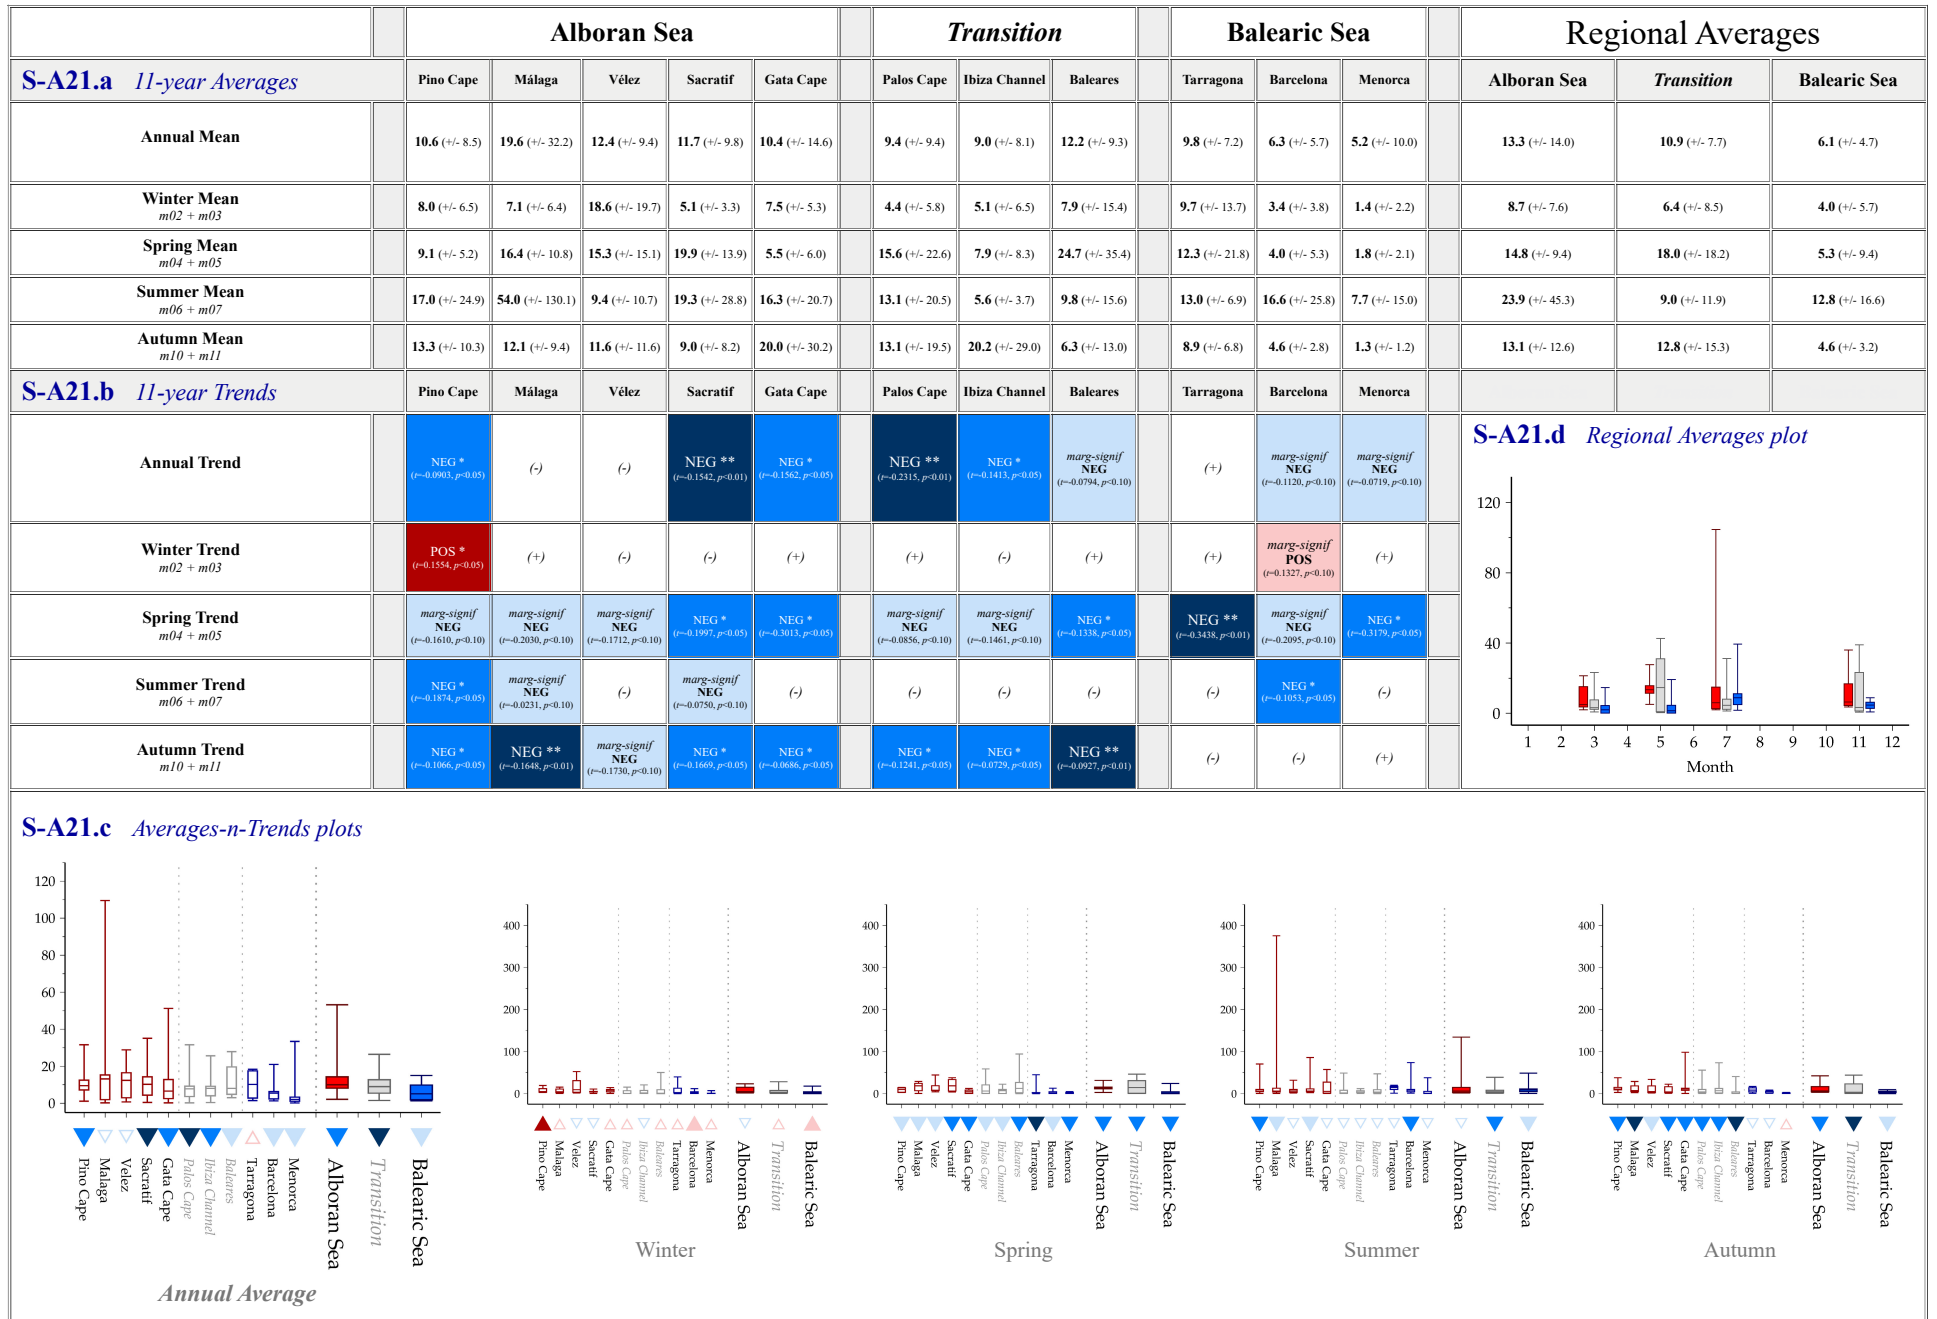

Table S-A22 Total Appendicularia (ind. m<sup>-3</sup>) trends in the western Mediterranean Sea (2007-2017)

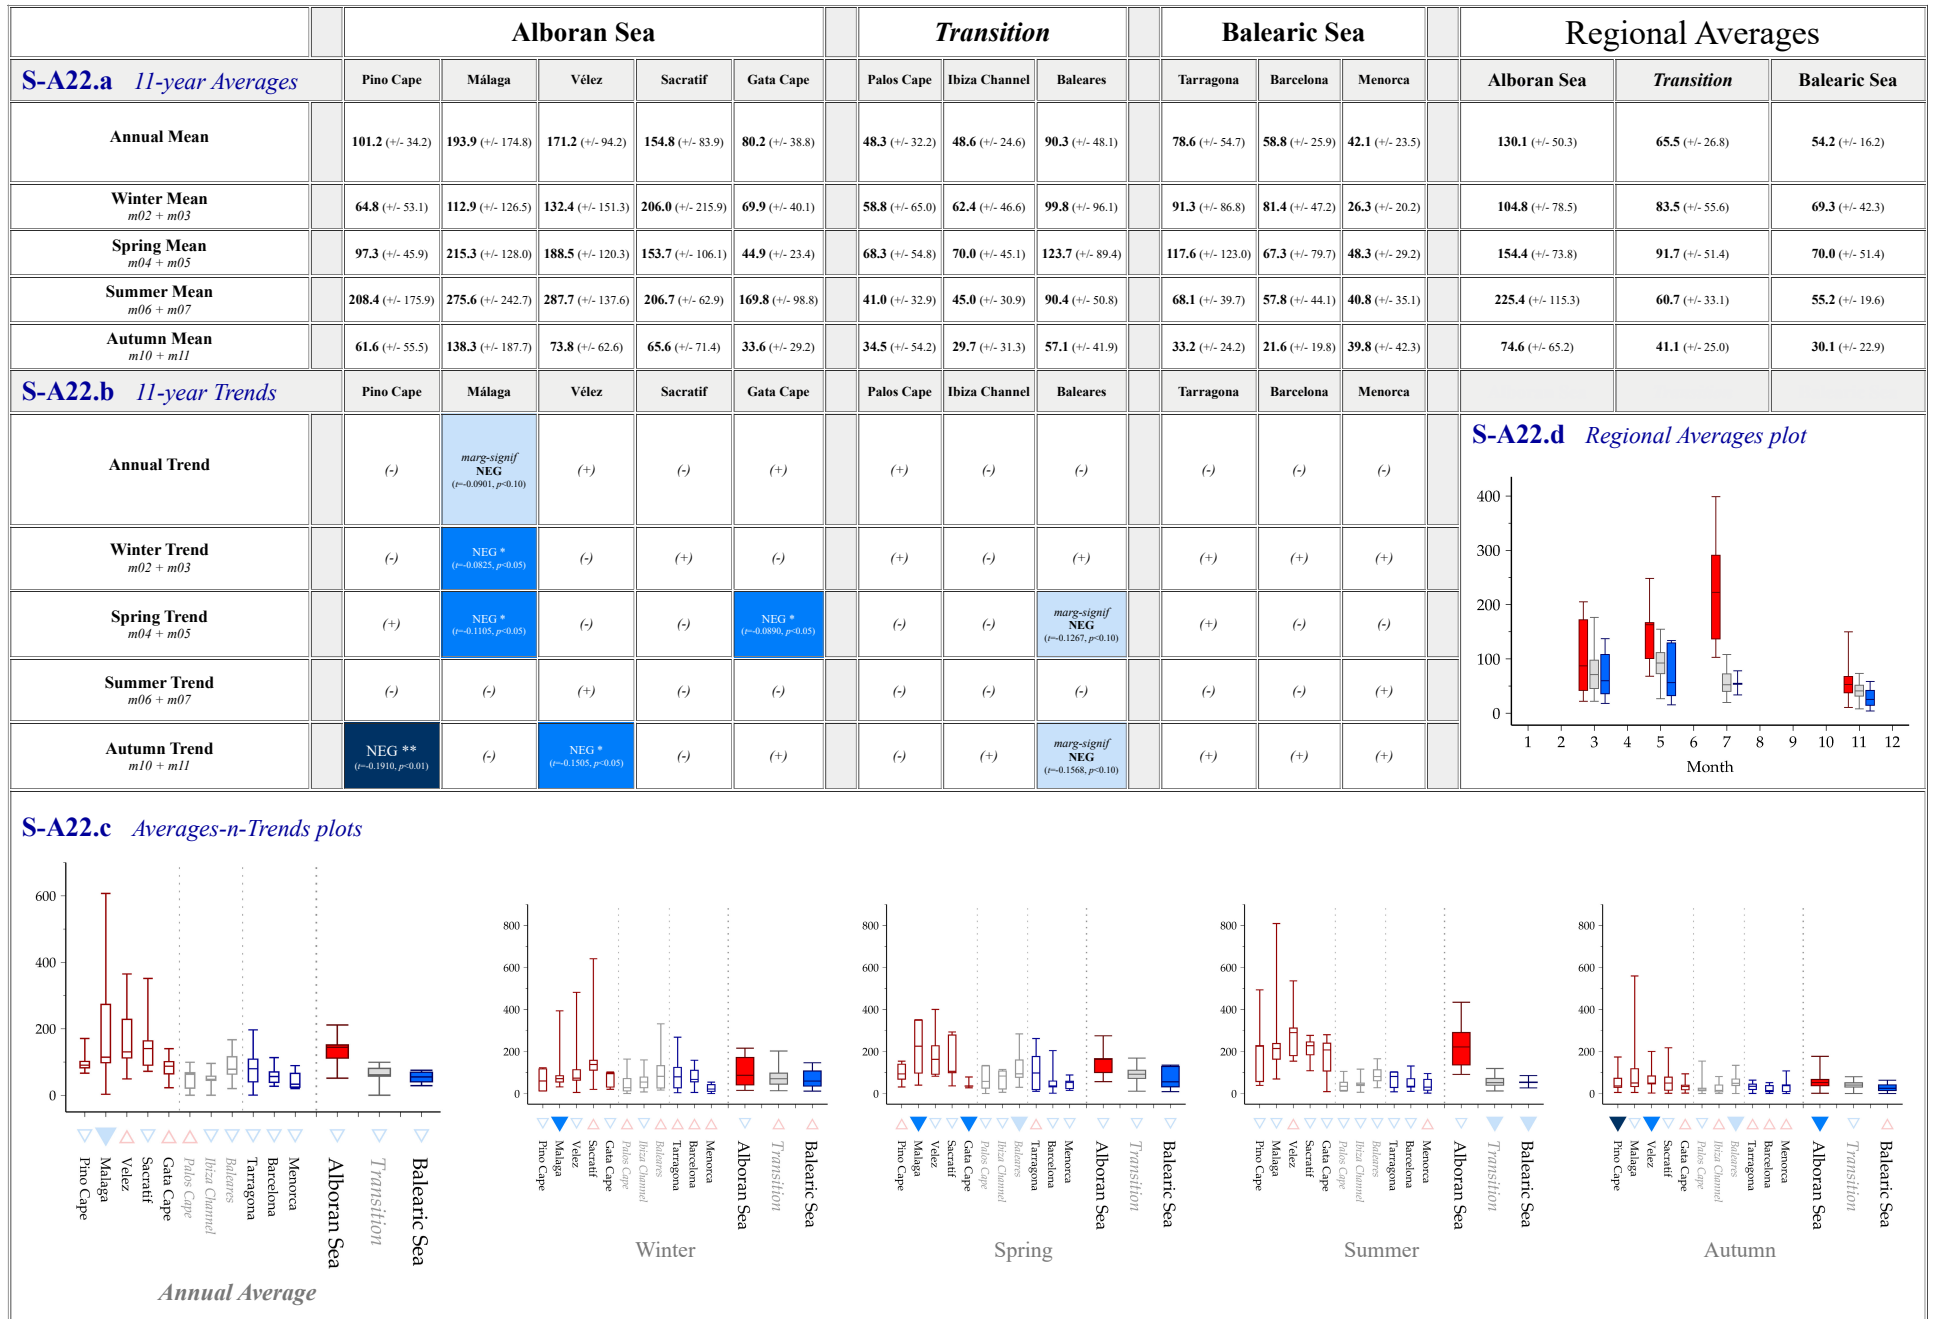

**Table S-A23** Total Doliolids (ind. m<sup>-3</sup>) trends in the western Mediterranean Sea (2007-2017)

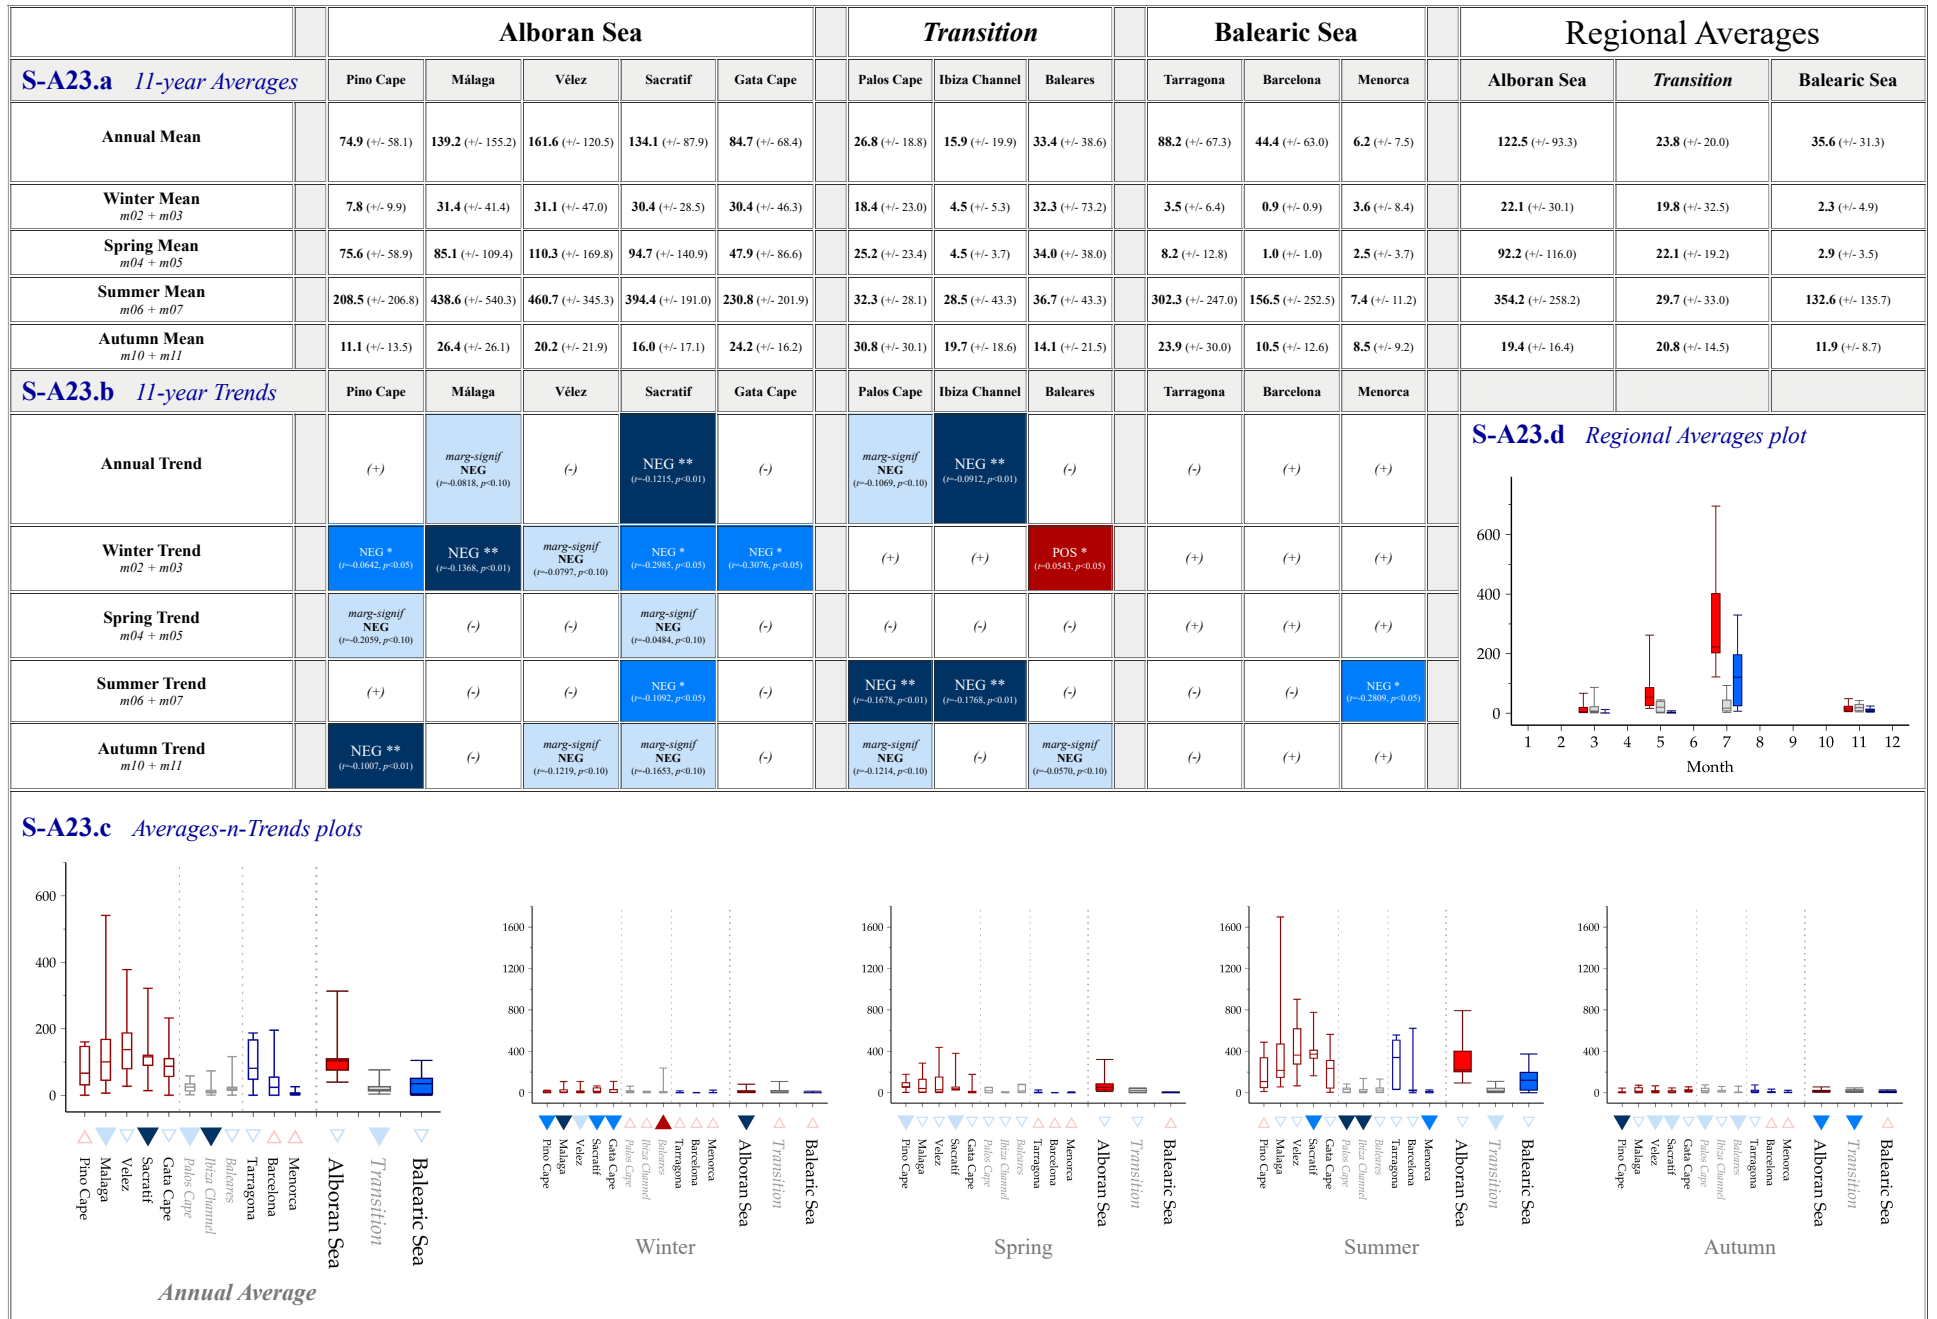

**Table S-A24** Total Salps (ind. m<sup>-3</sup>) trends in the western Mediterranean Sea (2007-2017)

|                                 |  | Alboran Sea   |                 |               |                |                                                  | Transition     |                                                  |                                                  | Balearic Sea                        |                                                  |                                    | Regional Averages              |                 |                 |
|---------------------------------|--|---------------|-----------------|---------------|----------------|--------------------------------------------------|----------------|--------------------------------------------------|--------------------------------------------------|-------------------------------------|--------------------------------------------------|------------------------------------|--------------------------------|-----------------|-----------------|
| S-A24.a 11-year Averages        |  | Pino Cape     | Málaga          | Vélez         | Sacratif       | Gata Cape                                        | Palos Cape     | Ibiza Channel                                    | Baleares                                         | Tarragona                           | Barcelona                                        | Menorca                            | Alboran Sea                    | Transition      | Balearic Sea    |
| Annual Mean                     |  | 0.7 (+/- 0.6) | 6.9 (+/- 14.2)  | 1.4 (+/- 1.9) | 2.5 (+/- 2.9)  | 5.3 (+/- 4.1)                                    | 4.5 (+/- 5.8)  | 16.9 (+/- 25.5)                                  | 7.1 (+/- 19.2)                                   | 23.8 (+/- 48.8)                     | 7.7 (+/- 12.2)                                   | 9.3 (+/- 18.7)                     | 2.8 (+/- 3.4)                  | 8.8 (+/- 11.1)  | 13.2 (+/- 27.2) |
| Winter Mean<br>m02 + m03        |  | 1.3 (+/- 2.0) | 4.4 (+/- 7.1)   | 4.7 (+/- 8.6) | 7.5 (+/- 12.5) | 4.7 (+/- 9.4)                                    | 9.8 (+/- 16.6) | 28.8 (+/- 42.3)                                  | 27.4 (+/- 78.3)                                  | 34.8 (+/- 68.0)                     | 7.1 (+/- 13.1)                                   | 16.7 (+/- 27.6)                    | 4.5 (+/- 7.2)                  | 24.1 (+/- 39.8) | 16.7 (+/- 33.3) |
| Spring Mean<br>m04 + m05        |  | 0.5 (+/- 0.1) | 0.5 (+/- 0)     | 0.4 (+/- 0)   | 0.7 (+/- 0.9)  | 15.8 (+/- 17.7)                                  | 7.8 (+/- 12.4) | 25.2 (+/- 49.5)                                  | 1.4 (+/- 2.4)                                    | 20.3 (+/- 30.9)                     | 11.4 (+/- 17.8)                                  | 0.8 (+/- 0.6)                      | 2.4 (+/- 3.1)                  | 11.4 (+/- 20.4) | 12.4 (+/- 17.5) |
| Summer Mean<br>m06 + m07        |  | 0.5 (+/- 0)   | 22.9 (+/- 63.4) | 0.5 (+/- 0.5) | 0.4 (+/- 0.5)  | 1.7 (+/- 3.3)                                    | 0.5 (+/- 0.1)  | 1.0 (+/- 1.2)                                    | 1.1 (+/- 2.3)                                    | 0.2 (+/- 0)                         | 1.3 (+/- 2.1)                                    | 0.7 (+/- 0.4)                      | 5.0 (+/- 12.7)                 | 0.4 (+/- 0.4)   | 0.5 (+/- 0.7)   |
| Autumn Mean<br>m10 + m11        |  | 1.2 (+/- 1.5) | 0.9 (+/- 1.2)   | 0.4 (+/- 0.1) | 0.6 (+/- 1.0)  | 0.8 (+/- 0.5)                                    | 0.9 (+/- 0.9)  | 2.4 (+/- 2.8)                                    | 2.0 (+/- 2.9)                                    | 1.2 (+/- 0.6)                       | 1.9 (+/- 2.5)                                    | 3.3 (+/- 3.8)                      | 0.6 (+/- 0.4)                  | 1.6 (+/- 1.8)   | 1.6 (+/- 1.6)   |
| S-A24.b 11-year Trends          |  | Pino Cape     | Málaga          | Vélez         | Sacratif       | Gata Cape                                        | Palos Cape     | Ibiza Channel                                    | Baleares                                         | Tarragona                           | Barcelona                                        | Menorca                            | S-A24.d Regional Averages plot |                 |                 |
| Annual Trend                    |  | (-)           | (+)             | (-)           | (-)            | marg-signif<br>NEG<br>( $r=-0.1192$ , $p<0.10$ ) | (+)            | marg-signif<br>NEG<br>( $r=-0.0517$ , $p<0.10$ ) | NEG **<br>( $r=-0.0313$ , $p<0.01$ )             | NEG *<br>( $r=-0.0978$ , $p<0.05$ ) | NEG *<br>( $r=-0.0025$ , $p<0.05$ )              | (-)                                |                                |                 |                 |
| Winter Trend<br>m02 + m03       |  | (-)           | (-)             | (-)           | (-)            | (-)                                              | (+)            | NEG *<br>( $r=-0.0803$ , $p<0.05$ )              | marg-signif<br>NEG<br>( $r=-0.0023$ , $p<0.10$ ) | (-)                                 | marg-signif<br>NEG<br>( $r=-0.1408$ , $p<0.10$ ) | (-)                                |                                |                 |                 |
| Spring Trend<br>m04 + m05       |  | (+)           |                 |               | (+)            | NEG **<br>( $r=-0.2857$ , $p<0.01$ )             | (+)            | (+)                                              | NEG *<br>( $r=-0.0714$ , $p<0.05$ )              | (-)                                 | marg-signif<br>NEG<br>( $r=-0.3731$ , $p<0.10$ ) | (+)                                |                                |                 |                 |
| Summer Trend<br>m06 + m07       |  |               | (+)             | (-)           | (+)            | (-)                                              | (+)            | (-)                                              | (-)                                              |                                     | (-)                                              | (-)                                |                                |                 |                 |
| Autumn Trend<br>m10 + m11       |  | (-)           | (+)             | (+)           | (+)            | (-)                                              | (-)            | (-)                                              | (-)                                              | (-)                                 | (+)                                              | POS *<br>( $r=0.3272$ , $p<0.05$ ) |                                |                 |                 |
| S-A24.c Averages-n-Trends plots |  |               |                 |               |                |                                                  |                |                                                  |                                                  |                                     |                                                  |                                    |                                |                 |                 |
|                                 |  |               |                 |               |                |                                                  |                |                                                  |                                                  |                                     |                                                  |                                    |                                |                 |                 |
| Annual Average                  |  |               |                 |               |                |                                                  |                |                                                  |                                                  |                                     |                                                  |                                    |                                |                 |                 |
|                                 |  |               |                 |               |                |                                                  |                |                                                  |                                                  |                                     |                                                  |                                    |                                |                 |                 |
| Winter                          |  |               |                 |               |                |                                                  |                |                                                  |                                                  |                                     |                                                  |                                    |                                |                 |                 |
|                                 |  |               |                 |               |                |                                                  |                |                                                  |                                                  |                                     |                                                  |                                    |                                |                 |                 |
| Spring                          |  |               |                 |               |                |                                                  |                |                                                  |                                                  |                                     |                                                  |                                    |                                |                 |                 |
|                                 |  |               |                 |               |                |                                                  |                |                                                  |                                                  |                                     |                                                  |                                    |                                |                 |                 |
| Summer                          |  |               |                 |               |                |                                                  |                |                                                  |                                                  |                                     |                                                  |                                    |                                |                 |                 |
|                                 |  |               |                 |               |                |                                                  |                |                                                  |                                                  |                                     |                                                  |                                    |                                |                 |                 |
| Autumn                          |  |               |                 |               |                |                                                  |                |                                                  |                                                  |                                     |                                                  |                                    |                                |                 |                 |

**Table S-A25** Total Siphonophores (ind. m<sup>-3</sup>) trends in the western Mediterranean Sea (2007-2017)

**S-A25.a** *11-year Averages*

|                                        | Pino Cape       | Málaga          | Vélez           | Sacratif        | Gata Cape       |
|----------------------------------------|-----------------|-----------------|-----------------|-----------------|-----------------|
| <b>Annual Mean</b>                     | 27.6 (+/- 8.6)  | 37.8 (+/- 20.0) | 44.0 (+/- 35.5) | 39.2 (+/- 20.2) | 20.6 (+/- 15.0) |
| <b>Winter Mean</b><br><i>m02 + m03</i> | 30.7 (+/- 47.4) | 32.4 (+/- 40.5) | 40.9 (+/- 43.3) | 27.6 (+/- 19.6) | 9.3 (+/- 4.3)   |
| <b>Spring Mean</b><br><i>m04 + m05</i> | 57.3 (+/- 29.0) | 52.5 (+/- 53.6) | 48.8 (+/- 58.9) | 72.3 (+/- 47.8) | 31.8 (+/- 37.6) |
| <b>Summer Mean</b><br><i>m06 + m07</i> | 21.4 (+/- 11.4) | 44.8 (+/- 26.6) | 52.6 (+/- 35.5) | 47.9 (+/- 38.0) | 35.4 (+/- 45.3) |
| <b>Autumn Mean</b><br><i>m10 + m11</i> | 9.4 (+/- 9.1)   | 22.6 (+/- 19.9) | 20.5 (+/- 14.4) | 14.9 (+/- 11.2) | 15.1 (+/- 7.4)  |

**S-A25.b** *11-year Trends*

|                                         | Pino Cape                                                 | Málaga | Vélez | Sacratif | Gata Cape                                    |
|-----------------------------------------|-----------------------------------------------------------|--------|-------|----------|----------------------------------------------|
| <b>Annual Trend</b>                     | (-)                                                       | (-)    | (-)   | (-)      | (-)                                          |
| <b>Winter Trend</b><br><i>m02 + m03</i> | (+)                                                       | (-)    | (+)   | (-)      | NEG *<br>( <i>r</i> =0.1622, <i>p</i> =0.05) |
| <b>Spring Trend</b><br><i>m04 + m05</i> | (-)                                                       | (-)    | (+)   | (-)      | NEG *<br>( <i>r</i> =0.1684, <i>p</i> =0.05) |
| <b>Summer Trend</b><br><i>m06 + m07</i> | NEG *<br>( <i>r</i> =0.1112, <i>p</i> =0.05)              | (-)    | (-)   | (-)      | (+)                                          |
| <b>Autumn Trend</b><br><i>m10 + m11</i> | marg-signif<br>NEG<br>( <i>r</i> =0.1059, <i>p</i> =0.10) | (-)    | (-)   | (-)      | (+)                                          |

**S-A25.c** *Averages-n-Trends plots*

**S-A25.d** *Regional Averages plot*

Table S-A26 Total Jellyfish small (ind. m<sup>-3</sup>) trends in the western Mediterranean Sea (2007-2017)

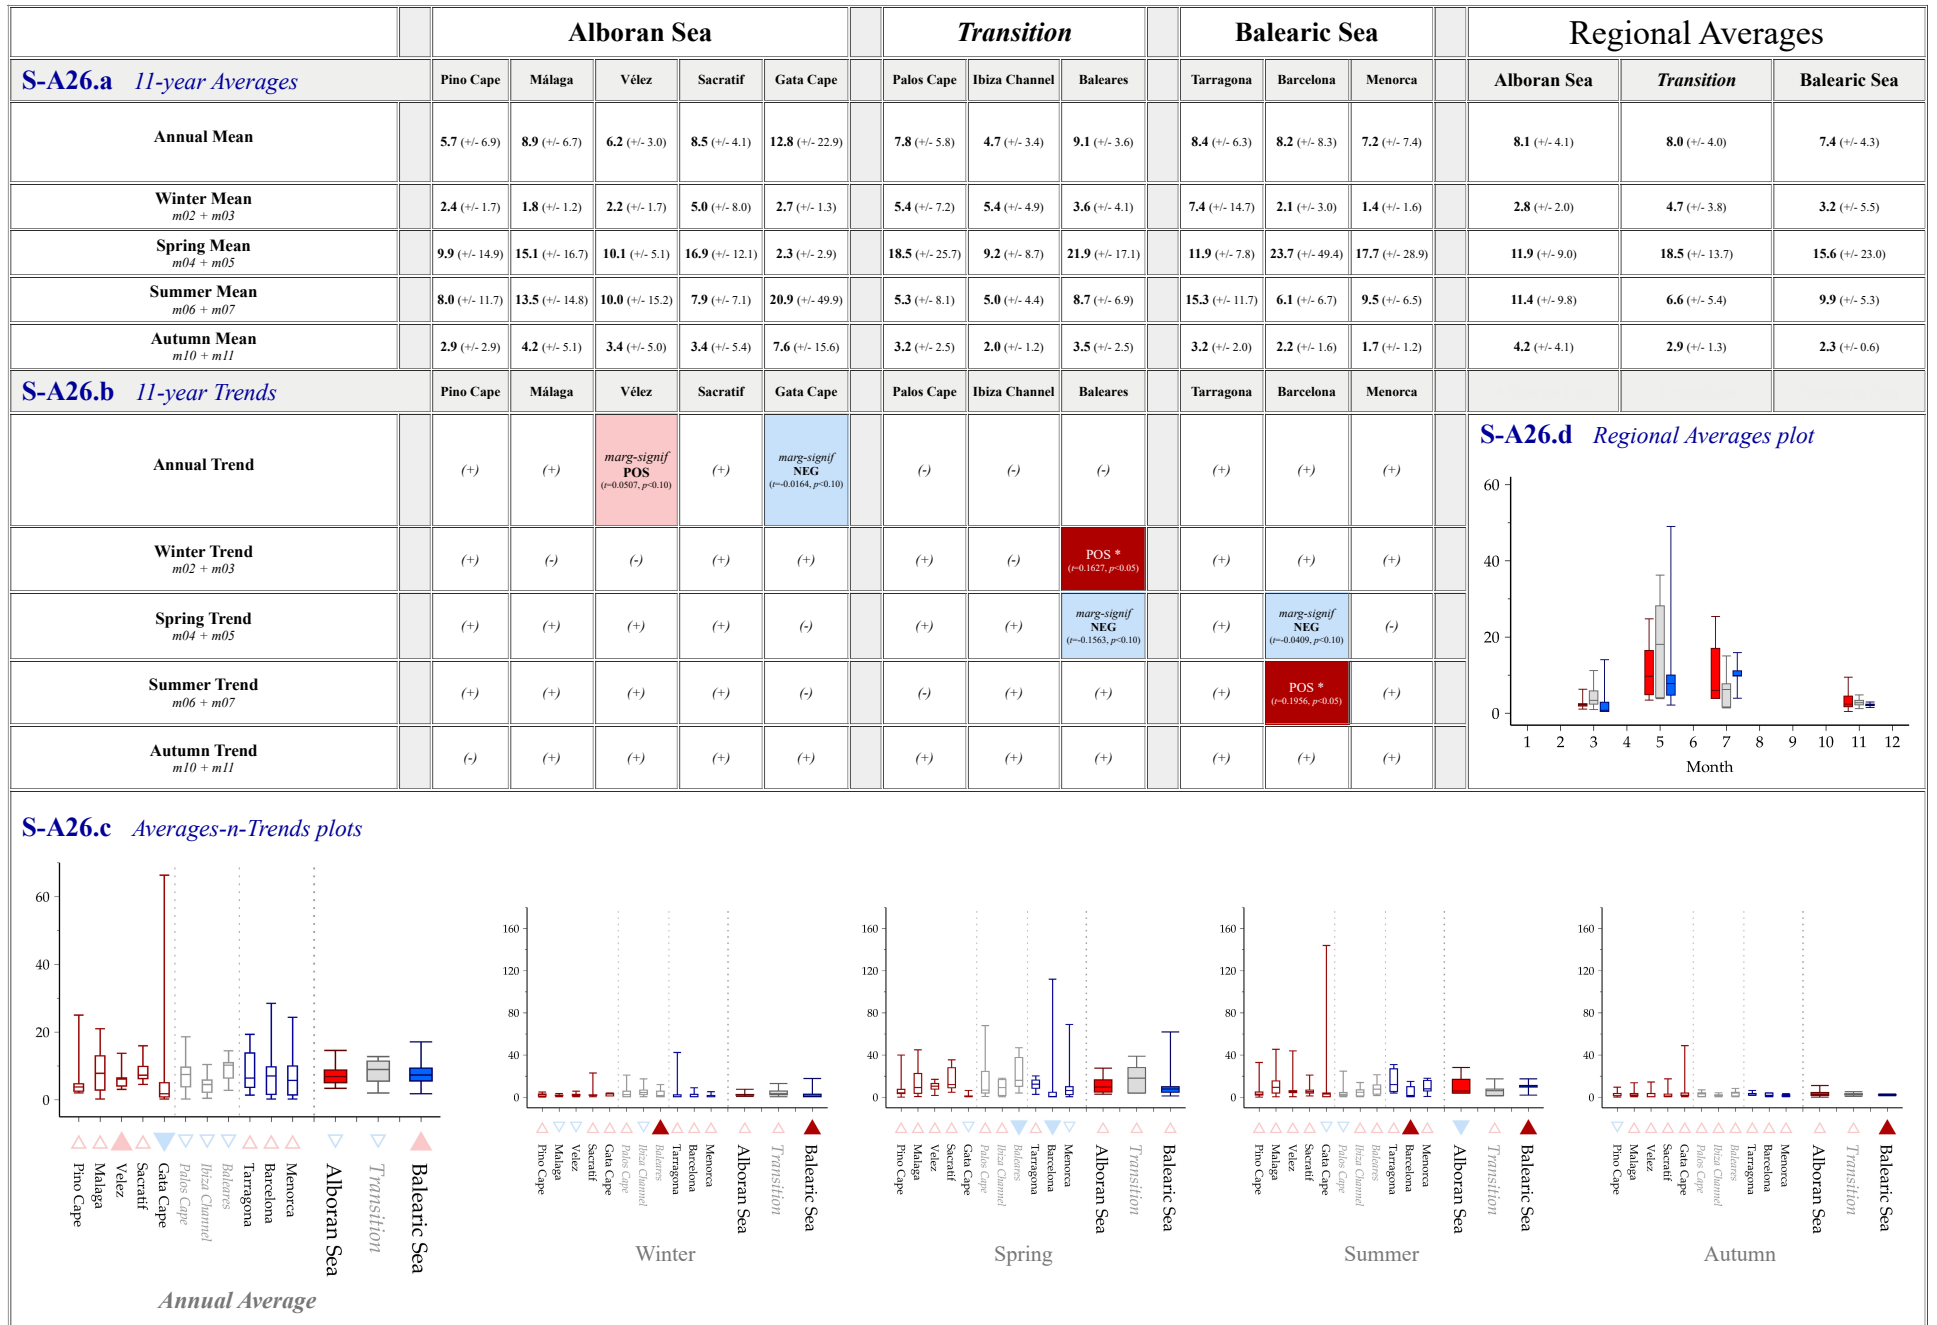

Supplement: s1 [file s1]
