# Supplementary material
Source: MDPI journal article supplement (https://www.mdpi.com/2073-4441/15/24/4267)
Supplement: s1 [file s1]

**Table S-C01**    *Correlations with annual-average*    **Sea Surface Temperature**

|                                                               |     | Alboran Sea                                                |                                                            |                                                             |                                              |                                                             |  | Transition                                                  |                                                             |                                              |  | Balearic Sea                                                |                                                             |                                                             |
|---------------------------------------------------------------|-----|------------------------------------------------------------|------------------------------------------------------------|-------------------------------------------------------------|----------------------------------------------|-------------------------------------------------------------|--|-------------------------------------------------------------|-------------------------------------------------------------|----------------------------------------------|--|-------------------------------------------------------------|-------------------------------------------------------------|-------------------------------------------------------------|
| Correlation Variables                                         | m00 | Pino Cape                                                  | Málaga                                                     | Vélez                                                       | Sacratif                                     | Gata Cape                                                   |  | Palos Cape                                                  | Ibiza Channel                                               | Baleares                                     |  | Tarragona                                                   | Barcelona                                                   | Menorca                                                     |
| Total Zooplankton<br><i>correlated-with SST</i>               |     | <i>ns</i>                                                  | <i>ns</i>                                                  | <i>ns</i>                                                   | <i>ns</i>                                    | <i>ns</i>                                                   |  | NEG <i>marg-signif</i><br>( $T_d(II) = -0.5182, p < 0.10$ ) | NEG *<br>( $T_d(II) = -0.6000, p < 0.05 *$ )                | NEG *<br>( $T_d(II) = -0.6909, p < 0.05 *$ ) |  | <i>ns</i>                                                   | NEG <i>marg-signif</i><br>( $T_d(II) = -0.5394, p < 0.10$ ) | <i>ns</i>                                                   |
| Total Copepods<br><i>correlated-with SST</i>                  |     | <i>ns</i>                                                  | <i>ns</i>                                                  | <i>ns</i>                                                   | <i>ns</i>                                    | <i>ns</i>                                                   |  | <i>ns</i>                                                   | <i>ns</i>                                                   | NEG *<br>( $T_d(II) = -0.6818, p < 0.05 *$ ) |  | <i>ns</i>                                                   | NEG *<br>( $T_d(II) = -0.6606, p < 0.05 *$ )                | <i>ns</i>                                                   |
| Total Cladocera<br><i>correlated-with SST</i>                 |     | <i>ns</i>                                                  | <i>ns</i>                                                  | <i>ns</i>                                                   | <i>ns</i>                                    | NEG <i>marg-signif</i><br>( $T_d(II) = -0.5455, p < 0.10$ ) |  | NEG *<br>( $T_d(II) = -0.6932, p < 0.05 *$ )                | <i>ns</i>                                                   | <i>ns</i>                                    |  | <i>ns</i>                                                   | <i>ns</i>                                                   | <i>ns</i>                                                   |
| Total Ostracods<br><i>correlated-with SST</i>                 |     | NEG *<br>( $T_d(II) = -0.6848, p < 0.05 *$ )               | <i>ns</i>                                                  | NEG *<br>( $T_d(II) = -0.6848, p < 0.05 *$ )                | <i>ns</i>                                    | <i>ns</i>                                                   |  | <i>ns</i>                                                   | POS *<br>( $T_d(II) = 0.6182, p < 0.05 *$ )                 | <i>ns</i>                                    |  | <i>ns</i>                                                   | <i>ns</i>                                                   | <i>ns</i>                                                   |
| Total Euphausiids<br><i>correlated-with SST</i>               |     | <i>ns</i>                                                  | <i>ns</i>                                                  | <i>ns</i>                                                   | <i>ns</i>                                    | <i>ns</i>                                                   |  | <i>ns</i>                                                   | <i>ns</i>                                                   | <i>ns</i>                                    |  | NEG <i>marg-signif</i><br>( $T_d(II) = -0.6000, p < 0.10$ ) | NEG <i>marg-signif</i><br>( $T_d(II) = -0.5879, p < 0.10$ ) | <i>ns</i>                                                   |
| Total Amphipods<br><i>correlated-with SST</i>                 |     | <i>ns</i>                                                  | NEG **<br>( $T_d(II) = -0.9030, p < 0.01 **$ )             | <i>ns</i>                                                   | <i>ns</i>                                    | <i>ns</i>                                                   |  | <i>ns</i>                                                   | <i>ns</i>                                                   | <i>ns</i>                                    |  | <i>ns</i>                                                   | <i>ns</i>                                                   | <i>ns</i>                                                   |
| Total Isopods<br><i>correlated-with SST</i>                   |     | <i>ns</i>                                                  | <i>ns</i>                                                  | NEG <i>marg-signif</i><br>( $T_d(II) = -0.7143, p < 0.10$ ) | <i>ns</i>                                    | POS *<br>( $T_d(II) = 0.7583, p < 0.05 *$ )                 |  | <i>ns</i>                                                   | <i>ns</i>                                                   | <i>ns</i>                                    |  | <i>ns</i>                                                   | <i>ns</i>                                                   | NEG <i>marg-signif</i><br>( $T_d(II) = -0.6625, p < 0.10$ ) |
| Total Decapod Larvae<br><i>correlated-with SST</i>            |     | <i>ns</i>                                                  | POS <i>marg-signif</i><br>( $T_d(II) = 0.5394, p < 0.10$ ) | POS *<br>( $T_d(II) = 0.6606, p < 0.05 *$ )                 | <i>ns</i>                                    | <i>ns</i>                                                   |  | <i>ns</i>                                                   | <i>ns</i>                                                   | <i>ns</i>                                    |  | <i>ns</i>                                                   | <i>ns</i>                                                   | <i>ns</i>                                                   |
| Total Chaetognaths<br><i>correlated-with SST</i>              |     | <i>ns</i>                                                  | <i>ns</i>                                                  | <i>ns</i>                                                   | <i>ns</i>                                    | <i>ns</i>                                                   |  | <i>ns</i>                                                   | <i>ns</i>                                                   | <i>ns</i>                                    |  | <i>ns</i>                                                   | <i>ns</i>                                                   | <i>ns</i>                                                   |
| Total Pteropods<br><i>correlated-with SST</i>                 |     | <i>ns</i>                                                  | POS *<br>( $T_d(II) = 0.7333, p < 0.05 *$ )                | POS <i>marg-signif</i><br>( $T_d(II) = 0.5515, p < 0.10$ )  | POS *<br>( $T_d(II) = 0.6727, p < 0.05 *$ )  | POS **<br>( $T_d(II) = 0.8455, p < 0.01 **$ )               |  | POS *<br>( $T_d(II) = 0.6364, p < 0.05 *$ )                 | <i>ns</i>                                                   | <i>ns</i>                                    |  | <i>ns</i>                                                   | <i>ns</i>                                                   | <i>ns</i>                                                   |
| Total Polychaetes<br><i>correlated-with SST</i>               |     | <i>ns</i>                                                  | <i>ns</i>                                                  | <i>ns</i>                                                   | <i>ns</i>                                    | <i>ns</i>                                                   |  | <i>ns</i>                                                   | <i>ns</i>                                                   | <i>ns</i>                                    |  | <i>ns</i>                                                   | <i>ns</i>                                                   | <i>ns</i>                                                   |
| Total Other Meroplankton Larvae<br><i>correlated-with SST</i> |     | <i>ns</i>                                                  | NEG *<br>( $T_d(II) = -0.6485, p < 0.05 *$ )               | POS <i>marg-signif</i><br>( $T_d(II) = 0.5515, p < 0.10$ )  | NEG *<br>( $T_d(II) = -0.6848, p < 0.05 *$ ) | <i>ns</i>                                                   |  | NEG <i>marg-signif</i><br>( $T_d(II) = -0.5545, p < 0.10$ ) | NEG <i>marg-signif</i><br>( $T_d(II) = -0.5909, p < 0.10$ ) | <i>ns</i>                                    |  | <i>ns</i>                                                   | <i>ns</i>                                                   | <i>ns</i>                                                   |
| Total Appendicularia<br><i>correlated-with SST</i>            |     | <i>ns</i>                                                  | <i>ns</i>                                                  | <i>ns</i>                                                   | <i>ns</i>                                    | NEG <i>marg-signif</i><br>( $T_d(II) = -0.5364, p < 0.10$ ) |  | <i>ns</i>                                                   | NEG <i>marg-signif</i><br>( $T_d(II) = -0.5091, p < 0.10$ ) | <i>ns</i>                                    |  | <i>ns</i>                                                   | <i>ns</i>                                                   | <i>ns</i>                                                   |
| Total Doliolids<br><i>correlated-with SST</i>                 |     | <i>ns</i>                                                  | <i>ns</i>                                                  | <i>ns</i>                                                   | <i>ns</i>                                    | NEG <i>marg-signif</i><br>( $T_d(II) = -0.5477, p < 0.10$ ) |  | <i>ns</i>                                                   | <i>ns</i>                                                   | <i>ns</i>                                    |  | <i>ns</i>                                                   | <i>ns</i>                                                   | <i>ns</i>                                                   |
| Total Salps<br><i>correlated-with SST</i>                     |     | <i>ns</i>                                                  | <i>ns</i>                                                  | <i>ns</i>                                                   | <i>ns</i>                                    | NEG <i>marg-signif</i><br>( $T_d(II) = -0.5455, p < 0.10$ ) |  | <i>ns</i>                                                   | NEG *<br>( $T_d(II) = -0.6750, p < 0.05 *$ )                | <i>ns</i>                                    |  | NEG <i>marg-signif</i><br>( $T_d(II) = -0.5970, p < 0.10$ ) | NEG *<br>( $T_d(II) = -0.7091, p < 0.05 *$ )                | <i>ns</i>                                                   |
| Total Siphonophores<br><i>correlated-with SST</i>             |     | POS <i>marg-signif</i><br>( $T_d(II) = 0.5758, p < 0.10$ ) | <i>ns</i>                                                  | POS <i>marg-signif</i><br>( $T_d(II) = 0.5394, p < 0.10$ )  | <i>ns</i>                                    | NEG <i>marg-signif</i><br>( $T_d(II) = -0.5636, p < 0.10$ ) |  | <i>ns</i>                                                   | NEG <i>marg-signif</i><br>( $T_d(II) = -0.5455, p < 0.10$ ) | NEG *<br>( $T_d(II) = -0.6273, p < 0.05 *$ ) |  | <i>ns</i>                                                   | NEG <i>marg-signif</i><br>( $T_d(II) = -0.5394, p < 0.10$ ) | <i>ns</i>                                                   |
| Total Jellyfish small<br><i>correlated-with SST</i>           |     | <i>ns</i>                                                  | <i>ns</i>                                                  | <i>ns</i>                                                   | <i>ns</i>                                    | <i>ns</i>                                                   |  | <i>ns</i>                                                   | <i>ns</i>                                                   | <i>ns</i>                                    |  | POS <i>marg-signif</i><br>( $T_d(II) = 0.5758, p < 0.10$ )  | <i>ns</i>                                                   | <i>ns</i>                                                   |
| Correlation Variables                                         | m00 | Pino Cape                                                  | Málaga                                                     | Vélez                                                       | Sacratif                                     | Gata Cape                                                   |  | Palos Cape                                                  | Ibiza Channel                                               | Baleares                                     |  | Tarragona                                                   | Barcelona                                                   | Menorca                                                     |

Table S-C02    *Correlations with annual-average*    **Surface Salinity**

|                                                                       |  | Alboran Sea                                                       |           |                                                     |                                                                    |                                                                    |  | <i>Transition</i>                                                  |                                                       |                                                                    |  | Balearic Sea                                                       |                                                                   |                                                                    |
|-----------------------------------------------------------------------|--|-------------------------------------------------------------------|-----------|-----------------------------------------------------|--------------------------------------------------------------------|--------------------------------------------------------------------|--|--------------------------------------------------------------------|-------------------------------------------------------|--------------------------------------------------------------------|--|--------------------------------------------------------------------|-------------------------------------------------------------------|--------------------------------------------------------------------|
| Correlation Variables <b>m00</b>                                      |  | Pino Cape                                                         | Málaga    | Vélez                                               | Sacratif                                                           | Gata Cape                                                          |  | Palos Cape                                                         | Ibiza Channel                                         | Baleares                                                           |  | Tarragona                                                          | Barcelona                                                         | Menorca                                                            |
| <b>Total Zooplankton</b><br><i>correlated-with PSAL</i>               |  | <i>ns</i>                                                         | <i>ns</i> | <i>ns</i>                                           | <b>POS</b> <i>marg-signif</i><br>( $T_d(10) = 0.5515, p < 0.10$ )  | <i>ns</i>                                                          |  | <i>ns</i>                                                          | <i>ns</i>                                             | <i>ns</i>                                                          |  | <i>ns</i>                                                          | <b>POS *</b><br>( $T_d(10) = 0.7697, p < 0.05 *$ )                | <i>ns</i>                                                          |
| <b>Total Copepods</b><br><i>correlated-with PSAL</i>                  |  | <i>ns</i>                                                         | <i>ns</i> | <i>ns</i>                                           | <i>ns</i>                                                          | <i>ns</i>                                                          |  | <i>ns</i>                                                          |                                                       | <i>ns</i>                                                          |  | <i>ns</i>                                                          | <b>POS *</b><br>( $T_d(10) = 0.7697, p < 0.05 *$ )                | <i>ns</i>                                                          |
| <b>Total Cladocera</b><br><i>correlated-with PSAL</i>                 |  | <i>ns</i>                                                         | <i>ns</i> | <i>ns</i>                                           | <i>ns</i>                                                          | <b>NEG</b> <i>marg-signif</i><br>( $T_d(11) = -0.5727, p < 0.10$ ) |  | <i>ns</i>                                                          | <i>ns</i>                                             | <i>ns</i>                                                          |  | <i>ns</i>                                                          | <b>POS *</b><br>( $T_d(10) = 0.6939, p < 0.05 *$ )                | <i>ns</i>                                                          |
| <b>Total Ostracods</b><br><i>correlated-with PSAL</i>                 |  | <b>POS *</b><br>( $T_d(10) = 0.6485, p < 0.05 *$ )                | <i>ns</i> | <i>ns</i>                                           | <i>ns</i>                                                          | <i>ns</i>                                                          |  | <b>NEG</b> <i>marg-signif</i><br>( $T_d(11) = -0.5455, p < 0.10$ ) | <i>ns</i>                                             | <b>NEG *</b><br>( $T_d(11) = -0.7455, p < 0.05 *$ )                |  | <i>ns</i>                                                          | <i>ns</i>                                                         | <i>ns</i>                                                          |
| <b>Total Euphausiids</b><br><i>correlated-with PSAL</i>               |  | <i>ns</i>                                                         | <i>ns</i> | <i>ns</i>                                           | <i>ns</i>                                                          | <i>ns</i>                                                          |  | <i>ns</i>                                                          |                                                       | <b>POS</b> <i>marg-signif</i><br>( $T_d(10) = 0.5000, p < 0.10$ )  |  | <i>ns</i>                                                          | <b>POS *</b><br>( $T_d(10) = 0.6848, p < 0.05 *$ )                | <b>POS</b> <i>marg-signif</i><br>( $T_d(10) = 0.5758, p < 0.10$ )  |
| <b>Total Amphipods</b><br><i>correlated-with PSAL</i>                 |  | <i>ns</i>                                                         | <i>ns</i> | <i>ns</i>                                           | <i>ns</i>                                                          | <i>ns</i>                                                          |  | <b>NEG</b> <i>marg-signif</i><br>( $T_d(11) = -0.5477, p < 0.10$ ) | <i>ns</i>                                             | <i>ns</i>                                                          |  | <i>ns</i>                                                          | <i>ns</i>                                                         | <i>ns</i>                                                          |
| <b>Total Isopods</b><br><i>correlated-with PSAL</i>                   |  | <i>ns</i>                                                         | <i>ns</i> | <i>ns</i>                                           | <i>ns</i>                                                          | <i>ns</i>                                                          |  | <i>ns</i>                                                          | <i>ns</i>                                             | <i>ns</i>                                                          |  | <i>ns</i>                                                          | <i>ns</i>                                                         | <i>ns</i>                                                          |
| <b>Total Decapod Larvae</b><br><i>correlated-with PSAL</i>            |  | <i>ns</i>                                                         | <i>ns</i> | <i>ns</i>                                           | <i>ns</i>                                                          | <i>ns</i>                                                          |  | <i>ns</i>                                                          | <b>NEG **</b><br>( $T_d(11) = -0.8455, p < 0.01 **$ ) | <i>ns</i>                                                          |  | <b>NEG</b> <i>marg-signif</i><br>( $T_d(10) = -0.5273, p < 0.10$ ) | <i>ns</i>                                                         | <i>ns</i>                                                          |
| <b>Total Chaetognaths</b><br><i>correlated-with PSAL</i>              |  | <i>ns</i>                                                         | <i>ns</i> | <i>ns</i>                                           | <i>ns</i>                                                          | <i>ns</i>                                                          |  | <i>ns</i>                                                          | <i>ns</i>                                             | <i>ns</i>                                                          |  | <i>ns</i>                                                          | <b>POS</b> <i>marg-signif</i><br>( $T_d(10) = 0.5515, p < 0.10$ ) | <b>NEG</b> <i>marg-signif</i><br>( $T_d(10) = -0.5879, p < 0.10$ ) |
| <b>Total Pteropods</b><br><i>correlated-with PSAL</i>                 |  | <i>ns</i>                                                         | <i>ns</i> | <b>NEG *</b><br>( $T_d(10) = -0.6970, p < 0.05 *$ ) | <i>ns</i>                                                          | <i>ns</i>                                                          |  | <i>ns</i>                                                          | <i>ns</i>                                             | <i>ns</i>                                                          |  | <i>ns</i>                                                          | <i>ns</i>                                                         | <i>ns</i>                                                          |
| <b>Total Polychaetes</b><br><i>correlated-with PSAL</i>               |  | <b>POS</b> <i>marg-signif</i><br>( $T_d(10) = 0.5879, p < 0.10$ ) | <i>ns</i> | <i>ns</i>                                           | <i>ns</i>                                                          | <i>ns</i>                                                          |  | <i>ns</i>                                                          | <i>ns</i>                                             | <i>ns</i>                                                          |  | <i>ns</i>                                                          | <i>ns</i>                                                         | <i>ns</i>                                                          |
| <b>Total Other Meroplankton Larvae</b><br><i>correlated-with PSAL</i> |  | <i>ns</i>                                                         | <i>ns</i> | <i>ns</i>                                           | <i>ns</i>                                                          | <i>ns</i>                                                          |  | <i>ns</i>                                                          | <i>ns</i>                                             | <i>ns</i>                                                          |  | <i>ns</i>                                                          | <i>ns</i>                                                         | <i>ns</i>                                                          |
| <b>Total Appendicularia</b><br><i>correlated-with PSAL</i>            |  | <i>ns</i>                                                         | <i>ns</i> | <i>ns</i>                                           | <i>ns</i>                                                          | <i>ns</i>                                                          |  | <b>NEG</b> <i>marg-signif</i><br>( $T_d(11) = -0.5000, p < 0.10$ ) | <i>ns</i>                                             | <i>ns</i>                                                          |  | <i>ns</i>                                                          | <i>ns</i>                                                         | <i>ns</i>                                                          |
| <b>Total Doliolids</b><br><i>correlated-with PSAL</i>                 |  | <i>ns</i>                                                         | <i>ns</i> | <i>ns</i>                                           | <b>POS</b> <i>marg-signif</i><br>( $T_d(10) = 0.5273, p < 0.10$ )  | <i>ns</i>                                                          |  | <i>ns</i>                                                          | <i>ns</i>                                             | <b>NEG</b> <i>marg-signif</i><br>( $T_d(11) = -0.5727, p < 0.10$ ) |  | <i>ns</i>                                                          | <b>POS *</b><br>( $T_d(10) = 0.7273, p < 0.05 *$ )                | <b>NEG *</b><br>( $T_d(10) = -0.8303, p < 0.05 *$ )                |
| <b>Total Salps</b><br><i>correlated-with PSAL</i>                     |  | <i>ns</i>                                                         | <i>ns</i> | <i>ns</i>                                           | <b>NEG</b> <i>marg-signif</i><br>( $T_d(10) = -0.5879, p < 0.10$ ) | <i>ns</i>                                                          |  | <i>ns</i>                                                          | <i>ns</i>                                             | <i>ns</i>                                                          |  | <i>ns</i>                                                          | <b>POS</b> <i>marg-signif</i><br>( $T_d(10) = 0.5636, p < 0.10$ ) | <i>ns</i>                                                          |
| <b>Total Siphonophores</b><br><i>correlated-with PSAL</i>             |  | <i>ns</i>                                                         | <i>ns</i> | <i>ns</i>                                           | <b>POS *</b><br>( $T_d(10) = 0.6485, p < 0.05 *$ )                 | <i>ns</i>                                                          |  | <i>ns</i>                                                          | <i>ns</i>                                             | <i>ns</i>                                                          |  | <i>ns</i>                                                          | <b>POS *</b><br>( $T_d(10) = 0.7091, p < 0.05 *$ )                | <i>ns</i>                                                          |
| <b>Total Jellyfish small</b><br><i>correlated-with PSAL</i>           |  | <i>ns</i>                                                         | <i>ns</i> | <i>ns</i>                                           | <i>ns</i>                                                          | <b>POS *</b><br>( $T_d(11) = 0.6068, p < 0.05 *$ )                 |  | <i>ns</i>                                                          | <i>ns</i>                                             | <i>ns</i>                                                          |  | <i>ns</i>                                                          | <i>ns</i>                                                         | <b>POS</b> <i>marg-signif</i><br>( $T_d(10) = 0.5364, p < 0.10$ )  |
| Correlation Variables <b>m00</b>                                      |  | Pino Cape                                                         | Málaga    | Vélez                                               | Sacratif                                                           | Gata Cape                                                          |  | Palos Cape                                                         | Ibiza Channel                                         | Baleares                                                           |  | Tarragona                                                          | Barcelona                                                         | Menorca                                                            |

**Table S-C03**    *Correlations with annual-average*    **Scalar Surface Wind**

|                                                                       |  | Alboran Sea |                                                             |                                                             |                                                            |                                                            |  | Transition                                                 |                                                             |                                                            |  | Balearic Sea                                                |                                                            |           |
|-----------------------------------------------------------------------|--|-------------|-------------------------------------------------------------|-------------------------------------------------------------|------------------------------------------------------------|------------------------------------------------------------|--|------------------------------------------------------------|-------------------------------------------------------------|------------------------------------------------------------|--|-------------------------------------------------------------|------------------------------------------------------------|-----------|
| Correlation Variables <b>m00</b>                                      |  | Pino Cape   | Málaga                                                      | Vélez                                                       | Sacratif                                                   | Gata Cape                                                  |  | Palos Cape                                                 | Ibiza Channel                                               | Baleares                                                   |  | Tarragona                                                   | Barcelona                                                  | Menorca   |
| <b>Total Zooplankton</b><br><i>correlated-with WIND</i>               |  | <i>ns</i>   | <i>ns</i>                                                   | <i>ns</i>                                                   | <b>POS *</b><br>( $T_d(10) = 0.6848, p < 0.05 *$ )         | <i>ns</i>                                                  |  | <b>POS *</b><br>( $T_d(10) = 0.6364, p < 0.05 *$ )         | <b>POS *</b><br>( $T_d(11) = 0.6750, p < 0.05 *$ )          | <i>ns</i>                                                  |  | <i>ns</i>                                                   | <i>ns</i>                                                  | <i>ns</i> |
| <b>Total Copepods</b><br><i>correlated-with WIND</i>                  |  | <i>ns</i>   | <i>ns</i>                                                   | <i>ns</i>                                                   | <b>POS *</b><br>( $T_d(10) = 0.6606, p < 0.05 *$ )         | <i>ns</i>                                                  |  | <i>ns</i>                                                  | <i>ns</i>                                                   | <i>ns</i>                                                  |  | <i>ns</i>                                                   | <i>ns</i>                                                  | <i>ns</i> |
| <b>Total Cladocera</b><br><i>correlated-with WIND</i>                 |  | <i>ns</i>   | <i>ns</i>                                                   | <i>ns</i>                                                   | <i>ns</i>                                                  | <i>ns</i>                                                  |  | <b>POS *</b><br>( $T_d(11) = 0.6295, p < 0.05 *$ )         | <i>ns</i>                                                   | <b>POS marg-signif</b><br>( $T_d(11) = 0.5636, p < 0.10$ ) |  | <b>NEG marg-signif</b><br>( $T_d(10) = -0.5879, p < 0.10$ ) | <i>ns</i>                                                  | <i>ns</i> |
| <b>Total Ostracods</b><br><i>correlated-with WIND</i>                 |  | <i>ns</i>   | <i>ns</i>                                                   | <i>ns</i>                                                   | <i>ns</i>                                                  | <i>ns</i>                                                  |  | <i>ns</i>                                                  | <b>NEG marg-signif</b><br>( $T_d(11) = -0.5523, p < 0.10$ ) | <i>ns</i>                                                  |  | <i>ns</i>                                                   | <i>ns</i>                                                  | <i>ns</i> |
| <b>Total Euphausiids</b><br><i>correlated-with WIND</i>               |  | <i>ns</i>   | <i>ns</i>                                                   | <i>ns</i>                                                   | <b>POS marg-signif</b><br>( $T_d(10) = 0.6242, p < 0.10$ ) | <i>ns</i>                                                  |  | <b>POS *</b><br>( $T_d(10) = 0.7636, p < 0.05 *$ )         | <i>ns</i>                                                   | <i>ns</i>                                                  |  | <i>ns</i>                                                   | <i>ns</i>                                                  | <i>ns</i> |
| <b>Total Amphipods</b><br><i>correlated-with WIND</i>                 |  | <i>ns</i>   | <i>ns</i>                                                   | <b>POS marg-signif</b><br>( $T_d(10) = 0.5515, p < 0.10$ )  | <i>ns</i>                                                  | <i>ns</i>                                                  |  | <i>ns</i>                                                  | <i>ns</i>                                                   | <b>NEG *</b><br>( $T_d(11) = -0.6636, p < 0.05 *$ )        |  | <i>ns</i>                                                   | <i>ns</i>                                                  | <i>ns</i> |
| <b>Total Isopods</b><br><i>correlated-with WIND</i>                   |  | <i>ns</i>   | <i>ns</i>                                                   | <i>ns</i>                                                   | <i>ns</i>                                                  | <i>ns</i>                                                  |  | <i>ns</i>                                                  | <i>ns</i>                                                   | <i>ns</i>                                                  |  | <i>ns</i>                                                   | <i>ns</i>                                                  | <i>ns</i> |
| <b>Total Decapod Larvae</b><br><i>correlated-with WIND</i>            |  | <i>ns</i>   | <b>NEG marg-signif</b><br>( $T_d(10) = -0.6364, p < 0.10$ ) | <b>NEG marg-signif</b><br>( $T_d(10) = -0.6242, p < 0.10$ ) | <i>ns</i>                                                  | <i>ns</i>                                                  |  | <i>ns</i>                                                  | <i>ns</i>                                                   | <i>ns</i>                                                  |  | <i>ns</i>                                                   | <i>ns</i>                                                  | <i>ns</i> |
| <b>Total Chaetognaths</b><br><i>correlated-with WIND</i>              |  | <i>ns</i>   | <i>ns</i>                                                   | <i>ns</i>                                                   | <i>ns</i>                                                  | <i>ns</i>                                                  |  | <i>ns</i>                                                  | <i>ns</i>                                                   | <i>ns</i>                                                  |  | <i>ns</i>                                                   | <i>ns</i>                                                  | <i>ns</i> |
| <b>Total Pteropods</b><br><i>correlated-with WIND</i>                 |  | <i>ns</i>   | <b>NEG marg-signif</b><br>( $T_d(10) = -0.6000, p < 0.10$ ) | <b>NEG *</b><br>( $T_d(10) = -0.8061, p < 0.05 *$ )         | <i>ns</i>                                                  | <i>ns</i>                                                  |  | <i>ns</i>                                                  | <i>ns</i>                                                   | <i>ns</i>                                                  |  | <i>ns</i>                                                   | <b>NEG *</b><br>( $T_d(10) = -0.7333, p < 0.05 *$ )        | <i>ns</i> |
| <b>Total Polychaetes</b><br><i>correlated-with WIND</i>               |  | <i>ns</i>   | <i>ns</i>                                                   | <i>ns</i>                                                   | <i>ns</i>                                                  | <i>ns</i>                                                  |  | <i>ns</i>                                                  | <i>ns</i>                                                   | <i>ns</i>                                                  |  | <i>ns</i>                                                   | <i>ns</i>                                                  | <i>ns</i> |
| <b>Total Other Meroplankton Larvae</b><br><i>correlated-with WIND</i> |  | <i>ns</i>   | <b>POS *</b><br>( $T_d(10) = 0.6485, p < 0.05 *$ )          | <i>ns</i>                                                   | <b>POS *</b><br>( $T_d(10) = 0.8061, p < 0.05 *$ )         | <i>ns</i>                                                  |  | <b>POS marg-signif</b><br>( $T_d(11) = 0.5909, p < 0.10$ ) | <i>ns</i>                                                   | <i>ns</i>                                                  |  | <i>ns</i>                                                   | <b>POS marg-signif</b><br>( $T_d(10) = 0.5394, p < 0.10$ ) | <i>ns</i> |
| <b>Total Appendicularia</b><br><i>correlated-with WIND</i>            |  | <i>ns</i>   | <i>ns</i>                                                   | <i>ns</i>                                                   | <b>POS *</b><br>( $T_d(10) = 0.6485, p < 0.05 *$ )         | <i>ns</i>                                                  |  | <b>POS marg-signif</b><br>( $T_d(11) = 0.5636, p < 0.10$ ) | <i>ns</i>                                                   | <i>ns</i>                                                  |  | <i>ns</i>                                                   | <i>ns</i>                                                  | <i>ns</i> |
| <b>Total Doliolids</b><br><i>correlated-with WIND</i>                 |  | <i>ns</i>   | <i>ns</i>                                                   | <i>ns</i>                                                   | <i>ns</i>                                                  | <i>ns</i>                                                  |  | <b>POS *</b><br>( $T_d(10) = 0.6364, p < 0.05 *$ )         | <b>POS *</b><br>( $T_d(11) = 0.7568, p < 0.05 *$ )          | <i>ns</i>                                                  |  | <i>ns</i>                                                   | <i>ns</i>                                                  | <i>ns</i> |
| <b>Total Salps</b><br><i>correlated-with WIND</i>                     |  | <i>ns</i>   | <i>ns</i>                                                   | <i>ns</i>                                                   | <i>ns</i>                                                  | <b>POS *</b><br>( $T_d(11) = 0.6500, p < 0.05 *$ )         |  | <i>ns</i>                                                  | <b>POS marg-signif</b><br>( $T_d(11) = 0.5818, p < 0.10$ )  | <i>ns</i>                                                  |  | <i>ns</i>                                                   | <b>POS marg-signif</b><br>( $T_d(10) = 0.6364, p < 0.10$ ) | <i>ns</i> |
| <b>Total Siphonophores</b><br><i>correlated-with WIND</i>             |  | <i>ns</i>   | <i>ns</i>                                                   | <i>ns</i>                                                   | <i>ns</i>                                                  | <b>POS marg-signif</b><br>( $T_d(11) = 0.5182, p < 0.10$ ) |  | <b>POS marg-signif</b><br>( $T_d(11) = 0.5455, p < 0.10$ ) | <b>POS *</b><br>( $T_d(11) = 0.7159, p < 0.05 *$ )          | <b>POS *</b><br>( $T_d(11) = 0.6818, p < 0.05 *$ )         |  | <i>ns</i>                                                   | <i>ns</i>                                                  | <i>ns</i> |
| <b>Total Jellyfish small</b><br><i>correlated-with WIND</i>           |  | <i>ns</i>   | <i>ns</i>                                                   | <i>ns</i>                                                   | <i>ns</i>                                                  | <i>ns</i>                                                  |  | <i>ns</i>                                                  | <i>ns</i>                                                   | <i>ns</i>                                                  |  | <b>NEG *</b><br>( $T_d(10) = -0.6606, p < 0.05 *$ )         | <i>ns</i>                                                  | <i>ns</i> |
| Correlation Variables <b>m00</b>                                      |  | Pino Cape   | Málaga                                                      | Vélez                                                       | Sacratif                                                   | Gata Cape                                                  |  | Palos Cape                                                 | Ibiza Channel                                               | Baleares                                                   |  | Tarragona                                                   | Barcelona                                                  | Menorca   |

Table S-C04    *Correlations with annual-average*    **Satellite Chlorophyll**

|                                                               |  | Alboran Sea                                                                                  |                                                                                              |                                                                                              |                                                                                             |                                                                                              |  | Transition                                                                   |                                                                                              |                                                                                             |  | Balearic Sea                                                                  |                                                                                              |                                                                                              |
|---------------------------------------------------------------|--|----------------------------------------------------------------------------------------------|----------------------------------------------------------------------------------------------|----------------------------------------------------------------------------------------------|---------------------------------------------------------------------------------------------|----------------------------------------------------------------------------------------------|--|------------------------------------------------------------------------------|----------------------------------------------------------------------------------------------|---------------------------------------------------------------------------------------------|--|-------------------------------------------------------------------------------|----------------------------------------------------------------------------------------------|----------------------------------------------------------------------------------------------|
| Correlation Variables <b>m00</b>                              |  | Pino Cape                                                                                    | Málaga                                                                                       | Vélez                                                                                        | Sacratif                                                                                    | Gata Cape                                                                                    |  | Palos Cape                                                                   | Ibiza Channel                                                                                | Baleares                                                                                    |  | Tarragona                                                                     | Barcelona                                                                                    | Menorca                                                                                      |
| Total Zooplankton<br><i>correlated-with CHL</i>               |  | <i>ns</i>                                                                                    | <i>ns</i>                                                                                    | <i>ns</i>                                                                                    | <i>ns</i>                                                                                   | <i>ns</i>                                                                                    |  | <i>ns</i>                                                                    | <i>ns</i>                                                                                    | <i>ns</i>                                                                                   |  | <i>ns</i>                                                                     | <i>ns</i>                                                                                    | <i>ns</i>                                                                                    |
| Total Copepods<br><i>correlated-with CHL</i>                  |  | <i>ns</i>                                                                                    | <i>ns</i>                                                                                    | <i>ns</i>                                                                                    | <i>ns</i>                                                                                   | <i>ns</i>                                                                                    |  | <i>ns</i>                                                                    | <i>ns</i>                                                                                    | <i>ns</i>                                                                                   |  | <i>ns</i>                                                                     | <b>POS <i>marg-signif</i></b><br><i>(T<sub>d</sub>/I<sub>0</sub>) = 0.6121, p &lt; 0.10</i>  | <i>ns</i>                                                                                    |
| Total Cladocera<br><i>correlated-with CHL</i>                 |  | <b>NEG <i>marg-signif</i></b><br><i>(T<sub>d</sub>/I<sub>0</sub>) = -0.6121, p &lt; 0.10</i> | <i>ns</i>                                                                                    | <i>ns</i>                                                                                    | <i>ns</i>                                                                                   | <i>ns</i>                                                                                    |  | <i>ns</i>                                                                    | <i>ns</i>                                                                                    | <i>ns</i>                                                                                   |  | <i>ns</i>                                                                     | <i>ns</i>                                                                                    | <i>ns</i>                                                                                    |
| Total Ostracods<br><i>correlated-with CHL</i>                 |  | <i>ns</i>                                                                                    | <i>ns</i>                                                                                    | <i>ns</i>                                                                                    | <i>ns</i>                                                                                   | <b>NEG <i>marg-signif</i></b><br><i>(T<sub>d</sub>/I<sub>1</sub>) = -0.5182, p &lt; 0.10</i> |  | <i>ns</i>                                                                    | <b>NEG <i>marg-signif</i></b><br><i>(T<sub>d</sub>/I<sub>1</sub>) = -0.5273, p &lt; 0.10</i> | <i>ns</i>                                                                                   |  | <i>ns</i>                                                                     | <i>ns</i>                                                                                    | <i>ns</i>                                                                                    |
| Total Euphausiids<br><i>correlated-with CHL</i>               |  | <i>ns</i>                                                                                    | <i>ns</i>                                                                                    | <i>ns</i>                                                                                    | <i>ns</i>                                                                                   | <i>ns</i>                                                                                    |  | <i>ns</i>                                                                    | <i>ns</i>                                                                                    | <i>ns</i>                                                                                   |  | <i>ns</i>                                                                     | <i>ns</i>                                                                                    | <i>ns</i>                                                                                    |
| Total Amphipods<br><i>correlated-with CHL</i>                 |  | <i>ns</i>                                                                                    | <b>POS <i>marg-signif</i></b><br><i>(T<sub>d</sub>/I<sub>0</sub>) = 0.5515, p &lt; 0.10</i>  | <i>ns</i>                                                                                    | <i>ns</i>                                                                                   | <i>ns</i>                                                                                    |  | <i>ns</i>                                                                    | <i>ns</i>                                                                                    | <i>ns</i>                                                                                   |  | <b>NEG *</b><br><i>(T<sub>d</sub>/I<sub>0</sub>) = -0.7091, p &lt; 0.05 *</i> | <i>ns</i>                                                                                    | <b>NEG <i>marg-signif</i></b><br><i>(T<sub>d</sub>/I<sub>0</sub>) = -0.5273, p &lt; 0.10</i> |
| Total Isopods<br><i>correlated-with CHL</i>                   |  | <i>ns</i>                                                                                    | <i>ns</i>                                                                                    | <b>POS *</b><br><i>(T<sub>d</sub>/I<sub>0</sub>) = 0.8571, p &lt; 0.05 *</i>                 | <i>ns</i>                                                                                   | <b>NEG *</b><br><i>(T<sub>d</sub>/I<sub>0</sub>) = -0.8833, p &lt; 0.05 *</i>                |  | <i>ns</i>                                                                    | <i>ns</i>                                                                                    | <i>ns</i>                                                                                   |  | <i>ns</i>                                                                     | <b>POS <i>marg-signif</i></b><br><i>(T<sub>d</sub>/I<sub>0</sub>) = 0.6250, p &lt; 0.10</i>  | <i>ns</i>                                                                                    |
| Total Decapod Larvae<br><i>correlated-with CHL</i>            |  | <b>NEG **</b><br><i>(T<sub>d</sub>/I<sub>0</sub>) = -0.8545, p &lt; 0.01 **</i>              | <i>ns</i>                                                                                    | <i>ns</i>                                                                                    | <i>ns</i>                                                                                   | <i>ns</i>                                                                                    |  | <i>ns</i>                                                                    | <i>ns</i>                                                                                    | <i>ns</i>                                                                                   |  | <i>ns</i>                                                                     | <b>NEG <i>marg-signif</i></b><br><i>(T<sub>d</sub>/I<sub>0</sub>) = -0.5273, p &lt; 0.10</i> | <i>ns</i>                                                                                    |
| Total Chaetognaths<br><i>correlated-with CHL</i>              |  | <i>ns</i>                                                                                    | <i>ns</i>                                                                                    | <i>ns</i>                                                                                    | <i>ns</i>                                                                                   | <i>ns</i>                                                                                    |  | <i>ns</i>                                                                    | <i>ns</i>                                                                                    | <i>ns</i>                                                                                   |  | <i>ns</i>                                                                     | <i>ns</i>                                                                                    | <i>ns</i>                                                                                    |
| Total Pteropods<br><i>correlated-with CHL</i>                 |  | <b>NEG *</b><br><i>(T<sub>d</sub>/I<sub>0</sub>) = -0.6727, p &lt; 0.05 *</i>                | <b>NEG <i>marg-signif</i></b><br><i>(T<sub>d</sub>/I<sub>0</sub>) = -0.5879, p &lt; 0.10</i> | <b>NEG <i>marg-signif</i></b><br><i>(T<sub>d</sub>/I<sub>0</sub>) = -0.6121, p &lt; 0.10</i> | <i>ns</i>                                                                                   | <i>ns</i>                                                                                    |  | <i>ns</i>                                                                    | <i>ns</i>                                                                                    | <i>ns</i>                                                                                   |  | <b>POS *</b><br><i>(T<sub>d</sub>/I<sub>0</sub>) = 0.6848, p &lt; 0.05 *</i>  | <i>ns</i>                                                                                    | <i>ns</i>                                                                                    |
| Total Polychaetes<br><i>correlated-with CHL</i>               |  | <i>ns</i>                                                                                    | <i>ns</i>                                                                                    | <i>ns</i>                                                                                    | <i>ns</i>                                                                                   | <i>ns</i>                                                                                    |  | <i>ns</i>                                                                    | <i>ns</i>                                                                                    | <i>ns</i>                                                                                   |  | <i>ns</i>                                                                     | <i>ns</i>                                                                                    | <b>NEG <i>marg-signif</i></b><br><i>(T<sub>d</sub>/I<sub>0</sub>) = -0.5515, p &lt; 0.10</i> |
| Total Other Meroplankton Larvae<br><i>correlated-with CHL</i> |  | <i>ns</i>                                                                                    | <b>POS *</b><br><i>(T<sub>d</sub>/I<sub>0</sub>) = 0.6848, p &lt; 0.05 *</i>                 | <i>ns</i>                                                                                    | <b>POS <i>marg-signif</i></b><br><i>(T<sub>d</sub>/I<sub>0</sub>) = 0.5636, p &lt; 0.10</i> | <i>ns</i>                                                                                    |  | <b>POS *</b><br><i>(T<sub>d</sub>/I<sub>1</sub>) = 0.6273, p &lt; 0.05 *</i> | <i>ns</i>                                                                                    | <b>POS <i>marg-signif</i></b><br><i>(T<sub>d</sub>/I<sub>1</sub>) = 0.5909, p &lt; 0.10</i> |  | <i>ns</i>                                                                     | <i>ns</i>                                                                                    | <i>ns</i>                                                                                    |
| Total Appendicularia<br><i>correlated-with CHL</i>            |  | <i>ns</i>                                                                                    | <b>POS *</b><br><i>(T<sub>d</sub>/I<sub>0</sub>) = 0.7939, p &lt; 0.05 *</i>                 | <i>ns</i>                                                                                    | <i>ns</i>                                                                                   | <i>ns</i>                                                                                    |  | <i>ns</i>                                                                    | <b>POS *</b><br><i>(T<sub>d</sub>/I<sub>1</sub>) = 0.6691, p &lt; 0.05 *</i>                 | <i>ns</i>                                                                                   |  | <b>POS *</b><br><i>(T<sub>d</sub>/I<sub>0</sub>) = 0.7212, p &lt; 0.05 *</i>  | <i>ns</i>                                                                                    | <i>ns</i>                                                                                    |
| Total Doliolids<br><i>correlated-with CHL</i>                 |  | <i>ns</i>                                                                                    | <i>ns</i>                                                                                    | <i>ns</i>                                                                                    | <i>ns</i>                                                                                   | <i>ns</i>                                                                                    |  | <i>ns</i>                                                                    | <i>ns</i>                                                                                    | <i>ns</i>                                                                                   |  | <i>ns</i>                                                                     | <i>ns</i>                                                                                    | <i>ns</i>                                                                                    |
| Total Salps<br><i>correlated-with CHL</i>                     |  | <i>ns</i>                                                                                    | <i>ns</i>                                                                                    | <i>ns</i>                                                                                    | <i>ns</i>                                                                                   | <i>ns</i>                                                                                    |  | <i>ns</i>                                                                    | <b>POS **</b><br><i>(T<sub>d</sub>/I<sub>1</sub>) = 0.8705, p &lt; 0.01 **</i>               | <i>ns</i>                                                                                   |  | <i>ns</i>                                                                     | <i>ns</i>                                                                                    | <i>ns</i>                                                                                    |
| Total Siphonophores<br><i>correlated-with CHL</i>             |  | <i>ns</i>                                                                                    | <i>ns</i>                                                                                    | <i>ns</i>                                                                                    | <i>ns</i>                                                                                   | <b>POS *</b><br><i>(T<sub>d</sub>/I<sub>1</sub>) = 0.7545, p &lt; 0.05 *</i>                 |  | <i>ns</i>                                                                    | <b>POS *</b><br><i>(T<sub>d</sub>/I<sub>1</sub>) = 0.7545, p &lt; 0.05 *</i>                 | <i>ns</i>                                                                                   |  | <i>ns</i>                                                                     | <i>ns</i>                                                                                    | <i>ns</i>                                                                                    |
| Total Jellyfish small<br><i>correlated-with CHL</i>           |  | <i>ns</i>                                                                                    | <i>ns</i>                                                                                    | <i>ns</i>                                                                                    | <i>ns</i>                                                                                   | <b>POS <i>marg-signif</i></b><br><i>(T<sub>d</sub>/I<sub>1</sub>) = 0.5023, p &lt; 0.10</i>  |  | <i>ns</i>                                                                    | <i>ns</i>                                                                                    | <b>POS *</b><br><i>(T<sub>d</sub>/I<sub>1</sub>) = 0.6182, p &lt; 0.05 *</i>                |  | <i>ns</i>                                                                     | <i>ns</i>                                                                                    | <i>ns</i>                                                                                    |
| Correlation Variables <b>m00</b>                              |  | Pino Cape                                                                                    | Málaga                                                                                       | Vélez                                                                                        | Sacratif                                                                                    | Gata Cape                                                                                    |  | Palos Cape                                                                   | Ibiza Channel                                                                                | Baleares                                                                                    |  | Tarragona                                                                     | Barcelona                                                                                    | Menorca                                                                                      |
