# Supplementary material
Source: MDPI journal article supplement (https://www.mdpi.com/2073-4441/15/24/4267)
Supplement: s1 [file s1]

**Table S-E01** Correlations of dominant Cladoceran and Copepod species with SST

|                                  | Alboran Sea |        |                                                         |                                                       |                                                        |  | Transition                                     |                                                       |                                                       |  | Balearic Sea |                                                       |         |
|----------------------------------|-------------|--------|---------------------------------------------------------|-------------------------------------------------------|--------------------------------------------------------|--|------------------------------------------------|-------------------------------------------------------|-------------------------------------------------------|--|--------------|-------------------------------------------------------|---------|
| Species                          | Pino Cape   | Málaga | Vélez                                                   | Sacratif                                              | Gata Cape                                              |  | Palos Cape                                     | Ibiza Channel                                         | Baleares                                              |  | Tarragona    | Barcelona                                             | Menorca |
| <i>Penilia avirostris</i>        | ns          | ns     | ns                                                      | ns                                                    | NEG marg-signif<br>$R_s(10) = -0.5879$ ,<br>$p < 0.10$ |  | NEG *<br>$R_s(9) = -0.8542$ ,<br>$p < 0.05$ *  | ns                                                    | ns                                                    |  | ns           | ns                                                    | ns      |
| <i>Evadne spinifera</i>          | ns          | ns     | ns                                                      | ns                                                    | ns                                                     |  | NEG *<br>$R_s(10) = -0.6727$ ,<br>$p < 0.05$ * | ns                                                    | ns                                                    |  | ns           | ns                                                    | ns      |
| <i>Clausocalanus arcuicornis</i> | ns          | ns     | ns                                                      | ns                                                    | ns                                                     |  | ns                                             | ns                                                    | ns                                                    |  | ns           | NEG marg-signif<br>$R_s(9) = -0.6167$ ,<br>$p < 0.10$ | ns      |
| <i>Clausocalanus lividus</i>     | ns          | ns     | ns                                                      | ns                                                    | ns                                                     |  | ns                                             | ns                                                    | NEG marg-signif<br>$R_s(8) = -0.7381$ ,<br>$p < 0.10$ |  | ns           | ns                                                    | ns      |
| <i>Clausocalanus furcatus</i>    | ns          | ns     | ns                                                      | ns                                                    | ns                                                     |  | ns                                             | ns                                                    | ns                                                    |  | ns           | ns                                                    | ns      |
| <i>Paracalanus parvus</i>        | ns          | ns     | ns                                                      | ns                                                    | ns                                                     |  | ns                                             | ns                                                    | ns                                                    |  | ns           | ns                                                    | ns      |
| <i>Centropages typicus</i>       | ns          | ns     | ns                                                      | ns                                                    | ns                                                     |  | ns                                             | NEG marg-signif<br>$R_s(9) = -0.6333$ ,<br>$p < 0.10$ | NEG *<br>$R_s(9) = -0.8500$ ,<br>$p < 0.05$ *         |  | ns           | NEG *<br>$R_s(9) = -0.7667$ ,<br>$p < 0.05$ *         | ns      |
| <i>Temora stylifera</i>          | ns          | ns     | POS<br>marg-signif<br>$R_s(8) = 0.8095$ ,<br>$p < 0.10$ | ns                                                    | ns                                                     |  | ns                                             | ns                                                    | ns                                                    |  | ns           | ns                                                    | ns      |
| <i>Calanus helgolandicus</i>     | ns          | ns     | ns                                                      | ns                                                    | ns                                                     |  | ns                                             | NEG marg-signif<br>$R_s(9) = -0.6000$ ,<br>$p < 0.10$ | ns                                                    |  | ns           | ns                                                    | ns      |
| <i>Subeucalanus monachus</i>     | ns          | ns     | ns                                                      | ns                                                    | ns                                                     |  |                                                |                                                       |                                                       |  |              |                                                       | .       |
| <i>Acartia clausi</i>            | ns          | ns     | ns                                                      | NEG marg-signif<br>$R_s(8) = -0.7857$ ,<br>$p < 0.10$ | ns                                                     |  | ns                                             | ns                                                    | ns                                                    |  | ns           | ns                                                    | ns      |
| Species                          | Pino Cape   | Málaga | Vélez                                                   | Sacratif                                              | Gata Cape                                              |  | Palos Cape                                     | Ibiza Channel                                         | Baleares                                              |  | Tarragona    | Barcelona                                             | Menorca |
|                                  | Alboran Sea |        |                                                         |                                                       |                                                        |  | Transition                                     |                                                       |                                                       |  | Balearic Sea |                                                       |         |

**Table S-E02** Correlations of dominant Cladoceran and Copepod species with PSAL

|                                  | Alboran Sea                                           |        |                                                       |                                              |           |  | Transition |                                               |                                                       |  | Balearic Sea |                                                      |                                                      |
|----------------------------------|-------------------------------------------------------|--------|-------------------------------------------------------|----------------------------------------------|-----------|--|------------|-----------------------------------------------|-------------------------------------------------------|--|--------------|------------------------------------------------------|------------------------------------------------------|
| Species                          | Pino Cape                                             | Málaga | Vélez                                                 | Sacratif                                     | Gata Cape |  | Palos Cape | Ibiza Channel                                 | Baleares                                              |  | Tarragona    | Barcelona                                            | Menorca                                              |
| <i>Penilia avirostris</i>        | ns                                                    | ns     | ns                                                    | ns                                           | ns        |  | ns         | NEG *<br>$R_s(9) = -0.7167$ ,<br>$p < 0.05$ * | NEG marg-signif<br>$R_s(8) = -0.6905$ ,<br>$p < 0.10$ |  | ns           | ns                                                   | ns                                                   |
| <i>Evadne spinifera</i>          | POS *<br>$R_s(9) = 0.7833$ ,<br>$p < 0.05$ *          | ns     | POS marg-signif<br>$R_s(10) = 0.5515$ ,<br>$p < 0.10$ | ns                                           | ns        |  | ns         | ns                                            | ns                                                    |  | ns           | ns                                                   | POS marg-signif<br>$R_s(7) = 0.8571$ ,<br>$p < 0.10$ |
| <i>Clausocalanus arcuicornis</i> | ns                                                    | ns     | ns                                                    | ns                                           | ns        |  | ns         | ns                                            | ns                                                    |  | ns           | POS marg-signif<br>$R_s(9) = 0.7000$ ,<br>$p < 0.10$ | POS marg-signif<br>$R_s(9) = 0.6000$ ,<br>$p < 0.10$ |
| <i>Clausocalanus lividus</i>     | ns                                                    | ns     | ns                                                    | ns                                           | ns        |  | ns         | ns                                            | POS marg-signif<br>$R_s(8) = 0.7619$ ,<br>$p < 0.10$  |  | ns           | ns                                                   | POS *<br>$R_s(8) = 0.8810$ ,<br>$p < 0.05$ *         |
| <i>Clausocalanus furcatus</i>    | ns                                                    | ns     | ns                                                    | ns                                           | ns        |  | ns         | ns                                            | ns                                                    |  | ns           | ns                                                   | POS *<br>$R_s(8) = 0.8571$ ,<br>$p < 0.05$ *         |
| <i>Paracalanus parvus</i>        | ns                                                    | ns     | ns                                                    | ns                                           | ns        |  | ns         | ns                                            | ns                                                    |  | ns           | ns                                                   | ns                                                   |
| <i>Centropages typicus</i>       | ns                                                    | ns     | ns                                                    | ns                                           | ns        |  | ns         | ns                                            | POS *<br>$R_s(9) = 0.8667$ ,<br>$p < 0.05$ *          |  | ns           | POS *<br>$R_s(9) = 0.8500$ ,<br>$p < 0.05$ *         | POS marg-signif<br>$R_s(9) = 0.6167$ ,<br>$p < 0.10$ |
| <i>Temora stylifera</i>          | ns                                                    | ns     | ns                                                    | POS *<br>$R_s(8) = 0.9048$ ,<br>$p < 0.05$ * | ns        |  | ns         | ns                                            | ns                                                    |  | ns           | ns                                                   | ns                                                   |
| <i>Calanus helgolandicus</i>     | ns                                                    | ns     | ns                                                    | ns                                           | ns        |  | ns         | ns                                            | ns                                                    |  | ns           | POS marg-signif<br>$R_s(8) = 0.8095$ ,<br>$p < 0.10$ | POS marg-signif<br>$R_s(9) = 0.6792$ ,<br>$p < 0.10$ |
| <i>Subeucalanus monachus</i>     | ns                                                    | ns     | ns                                                    | ns                                           | ns        |  | ns         | ns                                            | ns                                                    |  | ns           | ns                                                   | .                                                    |
| <i>Acartia clausi</i>            | NEG marg-signif<br>$R_s(8) = -0.7381$ ,<br>$p < 0.10$ | ns     | ns                                                    | ns                                           | ns        |  | ns         | ns                                            | ns                                                    |  | ns           | POS marg-signif<br>$R_s(8) = 0.7381$ ,<br>$p < 0.10$ | ns                                                   |
| Species                          | Pino Cape                                             | Málaga | Vélez                                                 | Sacratif                                     | Gata Cape |  | Palos Cape | Ibiza Channel                                 | Baleares                                              |  | Tarragona    | Barcelona                                            | Menorca                                              |
|                                  | Alboran Sea                                           |        |                                                       |                                              |           |  | Transition |                                               |                                                       |  | Balearic Sea |                                                      |                                                      |

**Table S-E03** Correlations of dominant Cladoceran and Copepod species with **CHL**

|                                  |  | Alboran Sea                                             |                                                          |                                                         |                                                         |           |  | Transition |               |          |  | Balearic Sea |           |         |
|----------------------------------|--|---------------------------------------------------------|----------------------------------------------------------|---------------------------------------------------------|---------------------------------------------------------|-----------|--|------------|---------------|----------|--|--------------|-----------|---------|
| Species                          |  | Pino Cape                                               | Málaga                                                   | Vélez                                                   | Sacratif                                                | Gata Cape |  | Palos Cape | Ibiza Channel | Baleares |  | Tarragona    | Barcelona | Menorca |
| <i>Penilia avirostris</i>        |  | ns                                                      | POS<br>marg-signif<br>$R_s(10) = 0.5515$ ,<br>$p < 0.10$ | ns                                                      | ns                                                      | ns        |  | ns         | ns            | ns       |  | ns           | ns        | ns      |
| <i>Evadne spinifera</i>          |  | ns                                                      | ns                                                       | ns                                                      | ns                                                      | ns        |  | ns         | ns            | ns       |  | ns           | ns        | ns      |
| <i>Clausocalanus arcuicornis</i> |  | ns                                                      | ns                                                       | ns                                                      | POS<br>marg-signif<br>$R_s(8) = 0.7381$ ,<br>$p < 0.10$ | ns        |  | ns         | ns            | ns       |  | ns           | ns        | ns      |
| <i>Clausocalanus lividus</i>     |  | ns                                                      | ns                                                       | ns                                                      | ns                                                      | ns        |  | ns         | ns            | ns       |  | ns           | ns        | ns      |
| <i>Clausocalanus furcatus</i>    |  | ns                                                      | ns                                                       | ns                                                      | ns                                                      | ns        |  | ns         | ns            | ns       |  | ns           | ns        | ns      |
| <i>Paracalanus parvus</i>        |  | ns                                                      | ns                                                       | ns                                                      | ns                                                      |           |  | ns         | ns            | ns       |  | ns           | ns        | ns      |
| <i>Centropages typicus</i>       |  | ns                                                      | ns                                                       | ns                                                      | ns                                                      | ns        |  | ns         | ns            | ns       |  | ns           | ns        | ns      |
| <i>Temora stylifera</i>          |  | ns                                                      | ns                                                       | ns                                                      | ns                                                      | ns        |  | ns         | ns            | ns       |  | ns           | ns        | ns      |
| <i>Calanus helgolandicus</i>     |  | ns                                                      | ns                                                       | ns                                                      | ns                                                      |           |  | ns         | ns            | ns       |  | ns           | ns        | ns      |
| <i>Subeucalanus monachus</i>     |  | POS<br>marg-signif<br>$R_s(8) = 0.7381$ ,<br>$p < 0.10$ | ns                                                       | ns                                                      | ns                                                      | ns        |  |            |               |          |  |              |           | .       |
| <i>Acartia clausi</i>            |  | ns                                                      | ns                                                       | POS<br>marg-signif<br>$R_s(8) = 0.7381$ ,<br>$p < 0.10$ | ns                                                      | ns        |  | ns         | ns            | ns       |  | ns           | ns        | ns      |
| Species                          |  | Pino Cape                                               | Málaga                                                   | Vélez                                                   | Sacratif                                                | Gata Cape |  | Palos Cape | Ibiza Channel | Baleares |  | Tarragona    | Barcelona | Menorca |
|                                  |  | Alboran Sea                                             |                                                          |                                                         |                                                         |           |  | Transition |               |          |  | Balearic Sea |           |         |
