# Supplementary material
Source: MDPI journal article supplement (https://www.mdpi.com/2073-4441/15/24/4267)
Supplement: s1 [file s1]

## Table S-B01: *Correlations of annual average WIND with SST*

|                                                      | Alboran Sea                                         |                                                                    |                                                                    |                                                                    |                                                       |  | Transition                                                         |                                                                    |           |  | Balearic Sea                                                       |                                                                    |                                                                    |
|------------------------------------------------------|-----------------------------------------------------|--------------------------------------------------------------------|--------------------------------------------------------------------|--------------------------------------------------------------------|-------------------------------------------------------|--|--------------------------------------------------------------------|--------------------------------------------------------------------|-----------|--|--------------------------------------------------------------------|--------------------------------------------------------------------|--------------------------------------------------------------------|
|                                                      | Pino Cape                                           | Málaga                                                             | Vélez                                                              | Sacratif                                                           | Gata Cape                                             |  | Palos Cape                                                         | Ibiza Channel                                                      | Baleares  |  | Tarragona                                                          | Barcelona                                                          | Menorca                                                            |
| <b>WIND &lt;=&gt; SST</b><br><i>Annual Avg</i>       | <i>ns</i>                                           | <b>NEG</b> <i>marg-signif</i><br>( $T_d(11) = -0.5545, p < 0.10$ ) | <b>NEG</b> <i>marg-signif</i><br>( $T_d(11) = -0.5545, p < 0.10$ ) | <i>ns</i>                                                          | <i>ns</i>                                             |  | <i>ns</i>                                                          | <b>NEG</b> <i>marg-signif</i><br>( $T_d(11) = -0.5750, p < 0.10$ ) | <i>ns</i> |  | <b>NEG *</b><br>( $T_d(11) = -0.6045, p < 0.05 *$ )                | <i>ns</i>                                                          | <b>NEG</b> <i>marg-signif</i><br>( $T_d(11) = -0.5273, p < 0.10$ ) |
| <b>WIND &lt;=&gt; SST</b><br><i>Winter (m02+m03)</i> | <i>ns</i>                                           | <i>ns</i>                                                          | <i>ns</i>                                                          | <b>NEG</b> <i>marg-signif</i><br>( $T_d(11) = -0.5000, p < 0.10$ ) | <i>ns</i>                                             |  | <i>ns</i>                                                          | <i>ns</i>                                                          | <i>ns</i> |  | <b>NEG</b> <i>marg-signif</i><br>( $T_d(11) = -0.5818, p < 0.10$ ) | <i>ns</i>                                                          | <i>ns</i>                                                          |
| <b>WIND &lt;=&gt; SST</b><br><i>Spring (m04+m05)</i> | <i>ns</i>                                           | <b>NEG *</b><br>( $T_d(11) = -0.7068, p < 0.05 *$ )                | <b>NEG *</b><br>( $T_d(11) = -0.7068, p < 0.05 *$ )                | <i>ns</i>                                                          | <i>ns</i>                                             |  | <i>ns</i>                                                          | <i>ns</i>                                                          | <i>ns</i> |  | <b>NEG</b> <i>marg-signif</i><br>( $T_d(11) = -0.5818, p < 0.10$ ) | <b>NEG</b> <i>marg-signif</i><br>( $T_d(11) = -0.5545, p < 0.10$ ) | <i>ns</i>                                                          |
| <b>WIND &lt;=&gt; SST</b><br><i>Summer (m06+m07)</i> | <i>ns</i>                                           | <i>ns</i>                                                          | <i>ns</i>                                                          | <b>NEG</b> <i>marg-signif</i><br>( $T_d(11) = -0.5614, p < 0.10$ ) | <i>ns</i>                                             |  | <i>ns</i>                                                          | <i>ns</i>                                                          | <i>ns</i> |  | <b>NEG *</b><br>( $T_d(11) = -0.6000, p < 0.05 *$ )                | <i>ns</i>                                                          | <i>ns</i>                                                          |
| <b>WIND &lt;=&gt; SST</b><br><i>Autumn (m10+m11)</i> | <b>NEG *</b><br>( $T_d(11) = -0.6455, p < 0.05 *$ ) | <b>NEG *</b><br>( $T_d(11) = -0.7636, p < 0.05 *$ )                | <b>NEG *</b><br>( $T_d(11) = -0.7636, p < 0.05 *$ )                | <b>NEG *</b><br>( $T_d(11) = -0.7273, p < 0.05 *$ )                | <b>NEG **</b><br>( $T_d(11) = -0.7909, p < 0.01 **$ ) |  | <b>NEG</b> <i>marg-signif</i><br>( $T_d(11) = -0.5364, p < 0.10$ ) | <i>ns</i>                                                          | <i>ns</i> |  | <i>ns</i>                                                          | <i>ns</i>                                                          | <i>ns</i>                                                          |

## Table S-B02: *Correlations of annual average CHL with SST*

|                                                     | Alboran Sea                                                        |                                                       |                                                       |                                                                    |                                                       |  | Transition                                          |                                                                    |                                                     |  | Balearic Sea                                                       |                                                     |                                                       |
|-----------------------------------------------------|--------------------------------------------------------------------|-------------------------------------------------------|-------------------------------------------------------|--------------------------------------------------------------------|-------------------------------------------------------|--|-----------------------------------------------------|--------------------------------------------------------------------|-----------------------------------------------------|--|--------------------------------------------------------------------|-----------------------------------------------------|-------------------------------------------------------|
|                                                     | Pino Cape                                                          | Málaga                                                | Vélez                                                 | Sacratif                                                           | Gata Cape                                             |  | Palos Cape                                          | Ibiza Channel                                                      | Baleares                                            |  | Tarragona                                                          | Barcelona                                           | Menorca                                               |
| <b>CHL &lt;=&gt; SST</b><br><i>Annual Avg</i>       | <b>NEG</b> <i>marg-signif</i><br>( $T_d(11) = -0.5455, p < 0.10$ ) | <b>NEG *</b><br>( $T_d(11) = -0.6182, p < 0.05 *$ )   | <b>NEG *</b><br>( $T_d(11) = -0.6182, p < 0.05 *$ )   | <b>NEG *</b><br>( $T_d(11) = -0.7818, p < 0.05 *$ )                | <b>NEG *</b><br>( $T_d(11) = -0.6000, p < 0.05 *$ )   |  | <i>ns</i>                                           | <b>NEG *</b><br>( $T_d(11) = -0.6727, p < 0.05 *$ )                | <b>NEG *</b><br>( $T_d(11) = -0.6818, p < 0.05 *$ ) |  | <i>ns</i>                                                          | <i>ns</i>                                           | <b>NEG *</b><br>( $T_d(11) = -0.7545, p < 0.05 *$ )   |
| <b>CHL &lt;=&gt; SST</b><br><i>Winter (m02+m03)</i> | <i>ns</i>                                                          | <i>ns</i>                                             | <i>ns</i>                                             | <i>ns</i>                                                          | <i>ns</i>                                             |  | <b>NEG *</b><br>( $T_d(11) = -0.6091, p < 0.05 *$ ) | <b>NEG **</b><br>( $T_d(11) = -0.8455, p < 0.01 **$ )              | <b>NEG *</b><br>( $T_d(11) = -0.7545, p < 0.05 *$ ) |  | <b>NEG</b> <i>marg-signif</i><br>( $T_d(11) = -0.5455, p < 0.10$ ) | <i>ns</i>                                           | <b>NEG **</b><br>( $T_d(11) = -0.8273, p < 0.01 **$ ) |
| <b>CHL &lt;=&gt; SST</b><br><i>Spring (m04+m05)</i> | <b>NEG **</b><br>( $T_d(11) = -0.8182, p < 0.01 **$ )              | <b>NEG **</b><br>( $T_d(11) = -0.8000, p < 0.01 **$ ) | <b>NEG **</b><br>( $T_d(11) = -0.8000, p < 0.01 **$ ) | <b>NEG *</b><br>( $T_d(11) = -0.6091, p < 0.05 *$ )                | <b>NEG **</b><br>( $T_d(11) = -0.8545, p < 0.01 **$ ) |  | <i>ns</i>                                           | <b>NEG</b> <i>marg-signif</i><br>( $T_d(11) = -0.5909, p < 0.10$ ) | <b>NEG *</b><br>( $T_d(11) = -0.6091, p < 0.05 *$ ) |  | <i>ns</i>                                                          | <i>ns</i>                                           | <b>NEG **</b><br>( $T_d(11) = -0.8364, p < 0.01 **$ ) |
| <b>CHL &lt;=&gt; SST</b><br><i>Summer (m06+m07)</i> | <i>ns</i>                                                          | <i>ns</i>                                             | <i>ns</i>                                             | <i>ns</i>                                                          | <i>ns</i>                                             |  | <i>ns</i>                                           | <b>NEG *</b><br>( $T_d(11) = -0.6545, p < 0.05 *$ )                | <b>NEG *</b><br>( $T_d(11) = -0.7114, p < 0.05 *$ ) |  | <b>NEG *</b><br>( $T_d(11) = -0.7000, p < 0.05 *$ )                | <b>NEG *</b><br>( $T_d(11) = -0.7091, p < 0.05 *$ ) | <b>NEG **</b><br>( $T_d(11) = -0.8545, p < 0.01 **$ ) |
| <b>CHL &lt;=&gt; SST</b><br><i>Autumn (m10+m11)</i> | <b>NEG</b> <i>marg-signif</i><br>( $T_d(11) = -0.5636, p < 0.10$ ) | <b>NEG *</b><br>( $T_d(11) = -0.6009, p < 0.05 *$ )   | <b>NEG *</b><br>( $T_d(11) = -0.6009, p < 0.05 *$ )   | <b>NEG</b> <i>marg-signif</i><br>( $T_d(11) = -0.5727, p < 0.10$ ) | <b>NEG **</b><br>( $T_d(11) = -0.8273, p < 0.01 **$ ) |  | <i>ns</i>                                           | <b>NEG</b> <i>marg-signif</i><br>( $T_d(11) = -0.5455, p < 0.10$ ) | <i>ns</i>                                           |  | <i>ns</i>                                                          | <i>ns</i>                                           | <i>ns</i>                                             |

## Table S-B03: *Correlations of annual average CHL with WIND*

|                                                      | Alboran Sea                                        |                                                                   |                                                                   |           |                                                    |  | Transition                                         |                                                    |           |  | Balearic Sea |           |                                                                   |
|------------------------------------------------------|----------------------------------------------------|-------------------------------------------------------------------|-------------------------------------------------------------------|-----------|----------------------------------------------------|--|----------------------------------------------------|----------------------------------------------------|-----------|--|--------------|-----------|-------------------------------------------------------------------|
|                                                      | Pino Cape                                          | Málaga                                                            | Vélez                                                             | Sacratif  | Gata Cape                                          |  | Palos Cape                                         | Ibiza Channel                                      | Baleares  |  | Tarragona    | Barcelona | Menorca                                                           |
| <b>CHL &lt;=&gt; WIND</b><br><i>Annual Avg</i>       | <i>ns</i>                                          | <b>POS</b> <i>marg-signif</i><br>( $T_d(11) = 0.5909, p < 0.10$ ) | <b>POS</b> <i>marg-signif</i><br>( $T_d(11) = 0.5909, p < 0.10$ ) | <i>ns</i> | <i>ns</i>                                          |  | <i>ns</i>                                          | <b>POS *</b><br>( $T_d(11) = 0.6750, p < 0.05 *$ ) | <i>ns</i> |  | <i>ns</i>    | <i>ns</i> | <b>POS *</b><br>( $T_d(11) = 0.7000, p < 0.05 *$ )                |
| <b>CHL &lt;=&gt; WIND</b><br><i>Winter (m02+m03)</i> | <i>ns</i>                                          | <i>ns</i>                                                         | <i>ns</i>                                                         | <i>ns</i> | <i>ns</i>                                          |  | <i>ns</i>                                          | <i>ns</i>                                          | <i>ns</i> |  | <i>ns</i>    | <i>ns</i> | <i>ns</i>                                                         |
| <b>CHL &lt;=&gt; WIND</b><br><i>Spring (m04+m05)</i> | <i>ns</i>                                          | <i>ns</i>                                                         | <i>ns</i>                                                         | <i>ns</i> | <i>ns</i>                                          |  | <i>ns</i>                                          | <i>ns</i>                                          | <i>ns</i> |  | <i>ns</i>    | <i>ns</i> | <b>POS</b> <i>marg-signif</i><br>( $T_d(11) = 0.5909, p < 0.10$ ) |
| <b>CHL &lt;=&gt; WIND</b><br><i>Summer (m06+m07)</i> | <b>POS *</b><br>( $T_d(11) = 0.7818, p < 0.05 *$ ) | <i>ns</i>                                                         | <i>ns</i>                                                         | <i>ns</i> | <i>ns</i>                                          |  | <i>ns</i>                                          | <i>ns</i>                                          | <i>ns</i> |  | <i>ns</i>    | <i>ns</i> | <i>ns</i>                                                         |
| <b>CHL &lt;=&gt; WIND</b><br><i>Autumn (m10+m11)</i> | <i>ns</i>                                          | <i>ns</i>                                                         | <i>ns</i>                                                         | <i>ns</i> | <b>POS *</b><br>( $T_d(11) = 0.7364, p < 0.05 *$ ) |  | <b>POS *</b><br>( $T_d(11) = 0.6836, p < 0.05 *$ ) | <b>POS *</b><br>( $T_d(11) = 0.6818, p < 0.05 *$ ) | <i>ns</i> |  | <i>ns</i>    | <i>ns</i> | <i>ns</i>                                                         |
